# Supplementary material for: Accelerated redevelopment of vocal skills is preceded by lasting reorganization of the song motor circuitry
Source: eLife journal article supplement (doi:10.7554/elife.43194), 2019-05-17
Supplement: supp [file elife-43194-supp-v1.zip]

Archive with 11 entries (11 files):
- elife_poa_e43194_Figure_4_figure_supplement_2.tif
- elife_poa_e43194_Figure_3_figure_supplement_2.tif
- elife_poa_e43194_Figure_4_source_data_1.xlsx
- elife_poa_e43194_Figure_2_figure_supplement_2.tif
- elife_poa_e43194_Figure_3_figure_supplement_1.tif
- elife_poa_e43194_Figure_2_source_data_1.xlsx
- elife_poa_e43194_Figure_3_source_data_1.xlsx
- elife_poa_e43194_Figure_5_source_data_1.xlsx
- elife_poa_e43194_Figure_2_figure_supplement_1.tif
- elife_poa_e43194_Figure_4_figure_supplement_1.tif
- elife_poa_e43194_Transparent_Reporting_File.pdf
