# Supplementary material for: Accelerated redevelopment of vocal skills is preceded by lasting reorganization of the song motor circuitry
Source: eLife journal article supplement (doi:10.7554/elife.43194), 2019-05-17
Supplement: supp [file elife-43194-supp-v1.zip › elife_poa_e43194_Figure_2_source_data_1.xlsx]

## Sheet: Syllable rate
day	B010_raw	B041_raw	B002_raw	B022_raw	B047_raw	B068_raw		MEAN	SD	SEM
0
1
2	0.0123666	0.314827	0.0871553	0.0202722	0.283677	0.065409		0.130618	0.133911	0.0546689
3	0.0172195	0.278824	0.173753	0.0268268	0.19923	0.0573575		0.125535	0.107123	0.043733
4	0.000461031	0.343839	0.170906	0.0334572	0.114783	0.0860024		0.124908	0.122893	0.0501707
5	0.00798691	0.544763	0.282508	0.0633586	0.0987832	0.0812038		0.179767	0.201549	0.0822821
6	0.0246382	0.699246	0.295507	0.0785037	0.0436611	0.0473606		0.198153	0.26518	0.108259
7	0.0594092	0.671214	0.345066	0.0903499	0.0637813	0.129736		0.226593	0.242539	0.0990161
8	0.0860199	0.455122	0.366241	0.0979273	0.0880058	0.154592		0.207985	0.161465	0.065918
9	0.118061	0.635263	0.315608	0.105505	0.0258459	0.0835248		0.213968	0.228555	0.0933073
10	0.109401	0.657821	0.333474	0.10385	0.0503892	0.0615124		0.219408	0.238399	0.097326
11	0.0848826	0.51713	0.327009	0.0936333	0.0691034	0.0642785		0.192673	0.187883	0.0767031
12	0.0474167	0.448602	0.274662	0.0852947	0.102986	0.0191049		0.163011	0.165977	0.0677598
13	0.0255345	0.384852	0.220513	0.0619952	0.0911028	0.0603979		0.140732	0.137365	0.0560791
14	0.0104057	0.491831	0.166364	0.0564503	0.118208	0		0.140543	0.183482	0.0749063
15	0	0.505099	0.172051	0.0513692	0.135942	0.0270872		0.148591	0.186603	0.0761802
16	0.00635883	0.482325	0.15202	0.0601269	0.163989	0.0541744		0.153166	0.172321	0.0703496
17	0.0127177	0.4511	0.0897794	0.0432284	0.205743	0.0761093		0.146446	0.163111	0.0665897
18	0.025932	0.176466	0.0570949	0.0510875	0.209523	0.061212		0.0968859	0.0761683	0.0310956
19	0.0114576	0.162168	0.0580204	0.0385098	0.233431	0.0633581		0.0944908	0.0851027	0.034743
20	0.0234831	0.159923	0.0339015	0.0283476	0.238158	0.0750154		0.093138	0.0876104	0.0357668
21	0.0223125	0.190918	0.0425535	0.0109817	0.187632	0.0450274		0.0832375	0.083116	0.0339319
22	0.0214233	0.17581	0.035697	0.0118995	0.153032	0.0649945		0.0771428	0.0703152	0.0287061
23	0.0158639	0.183206	0.00240541	0.00210769	0.107861	0.0556972		0.0611902	0.0722454	0.0294941
24	0.0212064	0.182136	0	0	0.0626903	0.0784602		0.0574155	0.0691812	0.0282431
25	0.0391991	0.143454	0.00161476	0.0314315	0.0885965	0.0583962		0.0604486	0.0498825	0.0203644
26	0.0401264	0.148289	0.0201225	0.00495854	0.047549	0.0781543		0.0565333	0.0514241	0.0209938
27	0.0339675	0.108431	0.0253351	0.020499	0.0688164	0.0481049		0.0508589	0.0331755	0.0135438
28	0.0320015	0.0958805	0.066199	0.0360394	0.0378128	0.081188		0.0581869	0.0268527	0.0109626
29	0.040362	0.125566	0.0692604	0.0433166	0.016405	0.110134		0.0675073	0.0427187	0.0174398
30	0.0413195	0.0722124	0.0854717	0.0505937	0	0.121379		0.0618295	0.0414313	0.0169142
31	0.0431341	0.0542991	0.0716481	0.0578709	0.000888009	0.182016		0.0683093	0.0607042	0.0247824
32	0.0565893	0.026741	0.0799983	0.0651481	0.0102153	0.22295		0.0769402	0.0759651	0.0310126
33	0.0414313	0.0193851	0.0858543	0.0724252	0.0311451	0.310781		0.0935038	0.109367	0.0446491
34	0.0406229	0	0.0762357	0.0797024	0.0267353	0.289424		0.0854534	0.104386	0.0426153
35	0.0540154	0.0324657	0.109331	0.0703262	0.0341295	0.268066		0.0947224	0.0895111	0.0365428
36	0.0674079	0.0660864	0.113433	0.058706	0.0162249	0.246709		0.0947612	0.0805917	0.0329014
37	0.0601525	0.0382733	0.124372	0.0426616	0.0301546	0.225351		0.0868276	0.0759342	0.031
38	0.0643618	0.0104602	0.137161	0.0475578	0.0437321	0.203994		0.0845444	0.072064	0.02942
39	0.059539	0.183222	0.164663	0.0453499	0.067274	0.182636		0.117114	0.0661412	0.027002
40	0.0481942	0.121517	0.192165	0.0494379	0.0775914	0.161279		0.108364	0.0600587	0.0245189
41	0.0466845	0.126301	0.219667	0.0513078	0.0879089	0.176694		0.118094	0.0696983	0.0284542
42	0.0398244	0.0983504	0.259563	0.023661	0.0848616	0.184734		0.115166	0.0904884	0.0369418
43	0.0421117	0.100268	0.228114	0.048675	0.0807349	0.164161		0.110678	0.0723912	0.0295536
44	0.0413194	0.110476	0.242129	0.0539108	0.067762	0.121067		0.106111	0.0736709	0.030076
45	0.04243	0.136629	0.267658	0.0575594	0.0836948	0.0998679		0.11464	0.08191	0.0334396
46	0.0405897	0.128697	0.309565	0.0598407	0.119977	0.103999		0.127111	0.0958002	0.0391103
47	0.0447536	0.147041	0.351721	0.0602405	0.0960419	0.115822		0.135937	0.112006	0.0457262
48	0.0418284	0.311173	0.393876	0.0795466	0.121228	0.133		0.180109	0.139853	0.0570948
49	0.0398995	0.195594	0.400987	0.0920491	0.0892489	0.112748		0.155088	0.130749	0.0533782
50	0.0458579	0.217215	0.46229	0.0867548	0.113573	0.145778		0.178578	0.150554	0.0614636
51	0.0501808	0.235046	0.422112	0.0902039	0.109444	0.187963		0.182492	0.135328	0.0552476
52	0.0600253	0.302623	0.462726	0.112377	0.138715	0.213377		0.214974	0.14793	0.0603921
53	0.0492326	0.272799	0.426249	0.108562	0.144397	0.231487		0.205454	0.135266	0.0552222
54	0.0509642	0.277543	0.469026	0.0981817	0.150719	0.270673		0.219518	0.152384	0.0622104
55	0.0494802	0.322269	0.511803	0.130623	0.169515	0.279002		0.243782	0.164505	0.0671589
56	0.0580532	0.286383	0.515604	0.126631	0.181373	0.247818		0.235977	0.159667	0.0651837
57	0.0709859	0.274576	0.526545	0.13502	0.183824	0.216633		0.234598	0.159008	0.0649146
58	0.067945	0.272842	0.547121	0.171192	0.161877	0.185449		0.234404	0.166511	0.067978
59	0.0642094	0.335968	0.514674	0.167213	0.182613	0.182001		0.241113	0.159691	0.0651934
60	0.0777336	0.294897	0.60996	0.171504	0.264565	0.189047		0.267951	0.184075	0.0751483
61	0.0904812	0.317818	0.615428	0.164787	0.278294	0.22396		0.281795	0.18235	0.0744441
62	0.0943317	0.350093	0.623669	0.18255	0.225611	0.264726		0.290164	0.184153	0.0751803
63	0.0843063	0.45709	0.678559	0.177833	0.275908	0.286541		0.326706	0.212563	0.0867784
64	0.0939707	0.411888	0.592864	0.173115	0.304198	0.296708		0.312124	0.176625	0.0721071
65	0.100183	0.419624	0.606927	0.168398	0.317326	0.294864		0.317887	0.1812	0.0739745
66	0.0951439	0.517865	0.645772	0.16368	0.330224	0.279158		0.338641	0.209744	0.0856275
67	0.105342	0.465806	0.657315	0.158963	0.307428	0.309397		0.334042	0.203046	0.0828934
68	0.137223	0.427608	0.665209	0.154246	0.282812	0.348133		0.335872	0.196109	0.0800612
69	0.137502	0.493544	0.590636	0.149528	0.261745	0.334433		0.327898	0.183823	0.0750455
70	0.137782	0.554358	0.686229	0.144811	0.270121	0.353532		0.357806	0.222701	0.0909173
71	0.11497	0.555821	0.660029	0.140093	0.280866	0.38338		0.35586	0.220666	0.0900866
72	0.239504	0.487136	0.581593	0.135376	0.205237	0.364478		0.335554	0.173567	0.0708586
73	0.226476	0.567157	0.51588	0.130658	0.334307	0.418745		0.365537	0.168265	0.068694
74	0.213447	0.483485	0.59567	0.125941	0.255872	0.398773		0.345531	0.177843	0.072604
75	0.200419	0.399813	0.662473	0.121223	0.309933	0.405095		0.349826	0.18946	0.0773466
76	0.18739	0.558537	0.710501	0.116506	0.530038	0.422658		0.420939	0.228871	0.0934362
77	0.174362	0.47464	0.758529	0.111788	0.491898	0.425953		0.406195	0.235364	0.0960871
78	0.161333	0.519799	0.683967	0.118557	0.307868	0.456758		0.374714	0.218648	0.0892626
79	0.147143	0.673313	0.692397	0.097023	0.123838	0.470508		0.367371	0.279563	0.114131
80	0.164104	0.710458	0.762643	0.107171	0.149679	0.448881		0.390489	0.29455	0.120249
81	0.154108	0.755893	0.811516	0.102675	0.39102	0.433091		0.441384	0.295219	0.120522
82	0.144113	0.754577	0.814362	0.142872	0.507583	0.430885		0.465732	0.288312	0.117703
83	0.142324	0.591474	0.811713	0.135831	0.451026	0.459472		0.431973	0.261671	0.106827
84	0.1947	0.513365	0.788808	0.119975	0.393855	0.443142		0.408974	0.239166	0.097639
85	0.181775	0.430912	0.824197	0.110965	0.492543	0.46494		0.417556	0.254163	0.103762
86	0.161331	0.504631	0.837388	0.120685	0.392427	0.482003		0.416411	0.261687	0.106833
87	0.19222	0.493244	0.832	0.14006	0.620936	0.492048		0.461751	0.260947	0.106531
88	0.169795	0.610085	0.861374	0.183662	0.590673	0.483962		0.483258	0.26781	0.109333
89	0.168431	0.536212	0.844573	0.1892	0.551214	0.487534		0.462861	0.253408	0.103454
90	0.166317	0.563234	0.889575	0.2446	0.508491	0.533004		0.484204	0.257684	0.105199
91	0.195465	0.421133	0.870742	0.278164	0.467102	0.530449		0.460509	0.235913	0.0963111
92	0.208158	0.433135	0.880612	0.302627	0.570652	0.565979		0.493527	0.237722	0.0970494
93	0.21378	0.584419	0.884546	0.293811	0.594589	0.552926		0.520678	0.240259	0.0980851
94	0.256569	0.602172	0.915572	0.339603	0.52283	0.59009		0.537806	0.231597	0.0945492
95	0.275667	0.715309	0.891693	0.39182	0.523445	0.623391		0.570221	0.22271	0.090921
96	0.312115	0.686018	0.873508	0.423082	0.537214	0.602307		0.572374	0.197864	0.0807778
97	0.333107	0.693669	0.921027	0.470452	0.546577	0.602937		0.594628	0.201264	0.0821657
98	0.344038	0.638826	0.907642	0.527786	0.512039	0.632575		0.593818	0.187324	0.0764747
99	0.331475	0.699622	0.905498	0.558642	0.601919	0.666108		0.62721	0.188149	0.0768117
100	0.362327	0.698653	0.908443	0.601729	0.590818	0.634178		0.632691	0.176749	0.0721575
101	0.409909	0.607498	0.91434	0.62423	0.702117	0.650533		0.651438	0.162907	0.0665066
102	0.38569	0.699788	0.905875	0.632242	0.648293	0.689587		0.660246	0.166773	0.0680848
103	0.369081	0.744807	0.870379	0.674936	0.65668	0.704838		0.67012	0.165961	0.0677534
104	0.385267	0.740024	0.88842	0.667739	0.525288	0.74536		0.658683	0.178629	0.0729248
105	0.416007	0.75493	0.87509	0.726459	0.761609	0.76302		0.716186	0.155706	0.0635667
106	0.409836	0.778691	0.871915	0.719619	0.758753	0.784972		0.720631	0.160278	0.0654332
107	0.407425	0.801963	0.822005	0.730177	0.719192	0.828262		0.718171	0.159142	0.0649695
108	0.427862	0.782649	0.859695	0.760121	0.802564	0.839204		0.745349	0.159728	0.0652087
109	0.439313	0.850396	0.864179	0.771421	0.781987	0.823983		0.755213	0.159019	0.0649192
110	0.418669	0.87601	0.876487	0.787342	0.81983	0.813884		0.76537	0.173547	0.0708502
111	0.432918	0.83182	0.910178	0.807615	0.795369	0.855355		0.772209	0.17112	0.0698595
112	0.462981	0.851772	0.871289	0.824894	0.794834	0.837438		0.773868	0.154464	0.0630595
113	0.482732	0.864861	0.891024	0.794924	0.813897	0.859556		0.784499	0.151971	0.0620418
114	0.480985	0.830501	0.906259	0.84692	0.817316	0.863668		0.790942	0.154955	0.0632599
115	0.491362	0.873714	0.90858	0.868201	0.70962	0.86955		0.786838	0.160685	0.0655994
116	0.509998	0.863321	0.932602	0.88217	0.813743	0.871378		0.812202	0.152863	0.0624062
117	0.570241	0.875559	0.926383	0.884743	0.829337	0.801914		0.814696	0.127453	0.0520324
118	0.557848	0.875555	0.941871	0.873551	0.803356	0.916577		0.828126	0.140526	0.0573696
119	0.574977	0.862429	0.930512	0.896811	0.762847	0.869782		0.816226	0.13085	0.0534194
120	0.578185	0.931957	0.925108	0.901783	0.74367	0.904378		0.830847	0.142116	0.0580187
121	0.59268	0.937556	0.912065	0.912831	0.734673	0.901327		0.831856	0.138303	0.056462
122	0.605016	0.952873	0.923117	0.925676	0.725677	0.927183		0.843257	0.143397	0.0585416
123	0.592692	0.929722	0.951125	0.918444	0.716681	0.894355		0.833836	0.14536	0.059343
124	0.604538	0.91226	0.927564	0.949375	0.707685	0.944396		0.84097	0.147441	0.0601926
125	0.622712	0.899839	0.932003	0.963284	0.872448	0.925266		0.869259	0.124615	0.050874
126	0.629969	0.891931	0.933154	0.963964	0.932462	0.943755		0.882539	0.125946	0.0514171
127	0.660513	0.89308	0.945715	0.968671	0.890364	0.929436		0.881297	0.11231	0.0458505
128	0.66051	0.944774	0.936112	0.974591	0.903624	0.935916		0.892588	0.115932	0.0473292
129	0.677931	0.951323	0.900544	0.971457	0.929537	0.972852		0.900607	0.112457	0.0459103
130	0.67948	0.939318	0.909008	0.982455	0.937759	0.879728		0.887958	0.107723	0.0439778
131	0.715796	0.934415	0.9343	0.97946	0.936654	0.915252		0.902646	0.0939574	0.0383579
132	0.716033	0.947694	0.931782	0.983261	0.944896	0.918047		0.906952	0.0960339	0.0392057
133	0.749188	0.942023	0.94611	0.984275	0.882911	0.954447		0.909826	0.0853414	0.0348405
134	0.748539	0.954273	0.944691	0.98847	0.948371	0.938496		0.920474	0.086043	0.0351269
135	0.785977	0.949967	0.93846	0.99026	0.741198	0.798364		0.867371	0.104196	0.0425378
136	0.787598	0.960681	0.945056	0.992416	0.755159	0.936303		0.896202	0.0990933	0.0404547
137	0.816164	0.975893	0.953817	0.987628	0.76912	0.936904		0.906588	0.0912076	0.0372353
138	0.822926	0.949453	0.958714	0.994792	0.783081	0.930081		0.906508	0.0838327	0.0342246
139	0.799289	0.954509	0.938783	0.994176	0.797042	0.959688		0.907248	0.0864118	0.0352775
140	0.842995	0.952384	0.92331	0.99347	0.811003	0.899272		0.903739	0.0679865	0.0277554
141	0.814408	0.97609	0.917886	0.992137	0.939324	0.94096		0.930134	0.0627704	0.0256259
142	0.83376	0.966266	0.925663	0.993617	1	0.929917		0.941537	0.0612286	0.0249965
143	0.850486	0.967349	0.924071	0.988537	0.998214	0.942356		0.945169	0.0540449	0.0220637
144	0.852717	0.959429	0.945968	0.989501	0.982263	0.935623		0.94425	0.0493533	0.0201484
145	0.87149	0.967485	0.957174	0.990637	0.993031	0.928889		0.951451	0.0457319	0.01867
146	0.860826	0.943817	0.963265	0.993766	0.99726	0.96974		0.954779	0.0501354	0.0204677
147	0.871251	0.958816	0.976092	0.991937	0.979717	0.955509		0.955554	0.0434674	0.0177455
148	0.87602	0.954556	0.971364	0.993224	0.977949	0.921566		0.949113	0.0433668	0.0177044
149	0.876759	0.977477	0.957868	0.991335	0.97237	0.931225		0.951172	0.0417957	0.017063
150	0.876192	0.977364	0.953842	0.985705	0.973991	0.954544		0.953606	0.0400103	0.0163341
151	0.881259	0.986641	0.97642	0.99418	0.945535	0.987664		0.96195	0.0431266	0.0176064
152	0.917345	0.969574	0.976975	0.991164	0.917079	0.948443		0.95343	0.0312643	0.0127636
153	0.92813	0.976426	0.972161	0.992962	0.888623	0.945716		0.95067	0.0382003	0.0155952
154	0.928258	0.96473	0.959276	0.982779	0.860167	0.922948		0.93636	0.0436704	0.0178284
155	0.925096	0.958577	0.946748	0.995458	0.831711	0.968383		0.937662	0.0568994	0.0232291
156	0.923396	0.968271	0.955608	0.991391	0.874312	0.918499		0.938579	0.0417725	0.0170536
157	0.924692	0.97279	0.973181	0.990963	0.916912	0.955618		0.955693	0.0293503	0.0119822
158	0.929541	0.975939	0.969879	0.991527	0.959512	0.932592		0.959832	0.0245952	0.010041
159	0.941498	0.970608	0.966086	0.997126	0.957584	0.959587		0.965415	0.018441	0.00752852
160	0.955702	0.982497	0.972113	0.994946		0.906253		0.962302	0.0344775	0.0154188
161	0.960018	0.978976	0.981652	0.993345		0.94315		0.971428	0.0198225	0.00886489
162	0.94822	0.970772	0.993601	0.995441		0.959157		0.973438	0.0208425	0.00932106
163	0.963083	0.985663	0.977653	0.995615		0.907557		0.965914	0.0347258	0.0155299
164	0.971688	0.992331	0.984247	0.996001		0.959233		0.9807	0.0151989	0.00679714
165	0.972813	0.993109	0.989807	0.99845		0.999523		0.99074	0.0107755	0.00481895
166	0.972643	0.978937	0.994716	0.994686		0.99775		0.987746	0.0112084	0.00501257
167	0.964387	0.990789	0.980817	0.999079		0.993237		0.985662	0.0135996	0.00608191
168	0.970715	0.982842	0.996724	0.99805		0.993712		0.988409	0.0115573	0.00516858
169	0.973622	0.986727	0.985611	0.999455		0.987425		0.986568	0.00915652	0.00409492
170	0.975546	0.986006	0.989942	0.999195		0.980869		0.986312	0.00901067	0.00402969
171	0.982726	0.97325	0.992278	1		1		0.989651	0.0115979	0.00518676
172	0.976818	0.993679	0.975304	0.999388		0.921673		0.973372	0.0307313	0.0137434
173	0.982064	0.984715	0.999675	0.999588		0.962854		0.985779	0.015201	0.00679811
174	0.978345	0.969237	0.991909	0.998138		0.946179		0.976762	0.0204988	0.00916732
175	0.975417	0.969407	1	0.999426		0.929505		0.974751	0.028821	0.0128891
176	0.98394	0.97039	0.9793	0.997431		0.91283		0.968778	0.0327654	0.0146532
177	0.978197	0.991593	0.977241	0.995435		0.896156		0.967724	0.040804	0.0182481
178	0.97841	0.990435	0.996738	0.993439		0.879482		0.967701	0.049799	0.0222708
179	0.984582	0.993544	0.987098	0.991444				0.989167	0.00406786	0.00203393
180	0.981213	0.988224	0.991954	0.988415				0.987451	0.00449888	0.00224944
181	0.981149	0.982295	0.987265	0.985385				0.984024	0.00280568	0.00140284
182	0.983148	0.98957	0.969743	0.982356				0.981204	0.00829565	0.00414783
183	0.980892	0.986808	0.981911	0.979327				0.982234	0.00322888	0.00161444
184	0.986162	0.987746	0.981257	0.976298				0.982866	0.00517712	0.00258856
185	0.98567	0.994696	0.980603	0.978742				0.984928	0.00713986	0.00356993
186	0.986849	0.866663	0.979949	0.980781				0.95356	0.0580132	0.0290066
187	0.983486	0.903165	0.979296	0.971357				0.959326	0.0377768	0.0188884
188	0.939636	0.939667	0.978642	0.971674				0.957405	0.0206961	0.010348
189
190
191
192
193
194
195
196
197
198
199
200
201
202
203
204
205
206
207
208
209
210
211
212
213
214
215
216
217
218
219
220
221
222
223
224
225
226
227
228
229
230
231
232
233
234
235
236
237
238
239
240
241
242
243
244
245
246
247
248
249
250
251
252
253
254
255
256
257
258
259
260
261
262
263
264
265
266
267
268
269
270
271
272
273
274
275
276
277
278
279
280
281
282
283
284
285
286
287
288
289	0.266107	0.481111	0.654704	0.644738	0.118855	0.493265		0.44313	0.212536	0.0867673
290	0.343686	0.627889	0.624785	0.651758	0.265913	0.490997		0.500838	0.163869	0.0668991
291	0.421264	0.686856	0.712833	0.63988	0.412971	0.561683		0.572581	0.130958	0.0534633
292	0.51063	0.754085	0.768015	0.628002	0.568235	0.631879		0.643474	0.101417	0.0414035
293	0.586399	0.813271	0.801792	0.80459	0.668824	0.66503		0.723318	0.0958838	0.0391444
294	0.60467	0.866331	0.843021	0.825526	0.742154	0.61218		0.74898	0.116671	0.0476308
295	0.664548	0.878876	0.877832	0.846462	0.740428	0.742511		0.791776	0.0885811	0.0361631
296	0.724426	0.862596	0.884148	0.854305	0.818375	0.701577		0.807571	0.0766033	0.0312732
297	0.773177	0.931952	0.892081	0.888579	0.82762	0.665027		0.829739	0.0981123	0.0400542
298	0.800234	0.962079	0.895559	0.905307	0.78639	0.575166		0.820789	0.137574	0.0561644
299	0.817035	0.978697	0.915379	0.918529	0.813166	0.674437		0.852874	0.108397	0.0442529
300	0.881041	0.975885	0.919052	0.93293	0.801405	0.830057		0.890062	0.0657048	0.0268239
301	0.895621	0.976069	0.918697	0.936906	0.827096	0.808821		0.893868	0.0646842	0.0264072
302	0.935008	0.978316	0.93332	0.949462	0.802184	0.852841		0.908522	0.066741	0.0272469
303	0.948623	0.981588	0.936487	0.912948	0.779226	0.950389		0.91821	0.0716319	0.0292436
304	0.945198	0.976523	0.961004	0.902611	0.714097	0.926737		0.904362	0.0967342	0.0394916
305	0.970765	0.986567	0.957914	0.892922	0.696957	0.899813		0.900823	0.106891	0.0436379
306	0.983013	0.989069	0.960644	0.781638	0.687526	0.92084		0.887122	0.124174	0.0506939
307	0.963486	0.987333	0.952423	0.903751	0.625856	0.966611		0.89991	0.137121	0.0559796
308	0.961281	0.980032	0.945492	0.854065	0.670247	0.949245		0.893394	0.11772	0.0480588
309	0.987115	0.97564	0.944628	0.936768	0.602557	0.949347		0.899343	0.146669	0.0598773
310	0.945513	0.98588	0.949484	0.932306	0.618675	0.95417		0.897671	0.13783	0.0562687
311	0.955332	0.978379	0.936361	0.955772	0.587444	0.949719		0.893834	0.150714	0.0615286
312	0.941642	0.976008	0.935265	0.97172		0.847827		0.934492	0.051653	0.0230999
313	0.96633	0.974255	0.928708	0.93497		0.862902		0.933433	0.0440113	0.0196824
314	0.951851	0.965642	0.928599	0.951921		0.830071		0.925617	0.0550453	0.024617
315	0.938893	0.963482	0.92299	0.946037				0.94285	0.0167918	0.00839589

## Sheet: syllable duration
day	B010_raw	B041_raw	B002_raw	B022_raw	B047_raw	B068_raw		MEAN	SD	SEM
0
1
2	0.395108	0.974966	0.84925	0.520485	0.830662	0.363427		0.65565	0.261388	0.106711
3	0.383353	0.938164	0.721973	0.488022	0.801609	0.346336		0.613243	0.241928	0.0987669
4	0.416308	0.890765	0.798068	0.458626	0.772556	0.364966		0.616882	0.22839	0.09324
5	0.363932	0.911052	0.550589	0.46724	0.772367	0.42197		0.581192	0.215328	0.0879072
6	0.273405	0.828967	0.296669	0.512371	0.31523	0.250859		0.412917	0.224397	0.0916099
7	0.150418	0.450061	0.228306	0.498932	0.593424	0.131091		0.342039	0.19679	0.0803392
8	0.0443555	0.391984	0.152256	0.377406	0.689758	0.109924		0.29428	0.240615	0.0982308
9	0	0.0199354	0.62205	0.255879	0.407105	0.0354619		0.223405	0.253121	0.103336
10	0.0332566	0.230715	0.583291	0.379517	0.486787	0		0.285595	0.239238	0.0976684
11	0.0512007	0.358819	0.386077	0.393085	0.533019	0.102032		0.304039	0.18699	0.0763383
12	0.0659532	0.53489	0.539036	0.423892	0.199063	0.216827		0.329944	0.197061	0.0804498
13	0.0671392	0.52345	0.360258	0.422336	0.00917703	0.549283		0.321941	0.230904	0.0942661
14	0.0947421	0.353678	0.181479	0.348354	0.0173438	0.353685		0.22488	0.148537	0.06064
15	0.118613	0.35863	0.147018	0.33715	0.051543	0.362544		0.22925	0.139091	0.0567835
16	0.0934165	0.389898	0.602454	0.263601	0.0056491	0.371402		0.287737	0.216518	0.088393
17	0.0682196	0	0.42829	0.30978	0	0.430381		0.206112	0.207068	0.0845351
18	0.0784594	0.735293	0	0.233243	0.0999817	0.363093		0.251678	0.269442	0.109999
19	0.07269	0.612312	0.191785	0.262909	0.0714906	0.353354		0.260757	0.204019	0.0832903
20	0.0434141	0.662795	0.236197	0.249885	0.0433248	0.444939		0.280092	0.240229	0.0980732
21	0.0353318	0.485261	0.2427	0.276422	0.148566	0.250934		0.239869	0.14957	0.0610615
22	0.0421267	0.564662	0.291751	0.255171	0.428633	0.321168		0.317252	0.175403	0.071608
23	0.062794	0.613794	0.295603	0.29047	0.31919	0.363968		0.324303	0.176499	0.0720555
24	0.0848175	0.593231	0.331128	0.287896	0.209747	0.402716		0.318256	0.173263	0.0707341
25	0.0568146	0.646015	0.284642	0.319092	0.605605	0.419928		0.388683	0.219114	0.0894529
26	0.105681	0.616964	0.486828	0.312812	0.272097	0.397056		0.36524	0.177739	0.0725617
27	0.143963	0.5463	0.511207	0.50933	0.630703	0.44416		0.464277	0.168323	0.0687176
28	0.142862	0.57303	0.610317	0.705849	0.280944	0.411302		0.454051	0.21476	0.0876753
29	0.135206	0.592912	0.712684	0.606456	0.124808	0.402665		0.429122	0.252339	0.103017
30	0.132151	0.520119	0.623336	0.507064	0.00206938	0.446047		0.371798	0.246256	0.100534
31	0.0916935	0.503789	0.674042	0.407671	0.0110666	0.452539		0.3568	0.254486	0.103893
32	0.138685	0.540362	0.727674	0.308279	0.152427	0.529573		0.3995	0.237424	0.0969278
33	0.121638	0.465538	0.625866	0.208887	0.249729	0.633079		0.384123	0.221231	0.0903171
34	0.107696	0.474337	0.566487	0.109494	0.251105	0.66519		0.362385	0.239619	0.0978239
35	0.172271	0.564695	0.666494	0.059614	0.1659	0.697302		0.387713	0.28571	0.116641
36	0.236846	0.586165	0.68589	0.0850256	0.234897	0.729413		0.426373	0.273429	0.111627
37	0.214514	0.521995	0.552597	0.0554743	0.230161	0.761524		0.389377	0.264628	0.108034
38	0.151768	0.457824	0.56994	0.0306912	0.0856203	0.793635		0.348247	0.305923	0.124893
39	0.118186	0.661716	0.572505	0	0.292688	0.825747		0.411807	0.325457	0.132867
40	0.100321	0.632274	0.57507	0.0699259	0.186489	0.857858		0.403656	0.328176	0.133977
41	0.121581	0.626619	0.577636	0.0181346	0.0802901	0.830847		0.375851	0.343684	0.140308
42	0.102262	0.57219	0.656593	0.0779428	0.0715337	0.869382		0.391651	0.350899	0.143254
43	0.10277	0.591476	0.652702	0.0213907	0.104832	0.861777		0.389158	0.355491	0.145128
44	0.0654578	0.576032	0.654155	0.0314429	0.0448563	0.827454		0.366566	0.359297	0.146682
45	0.0806239	0.538296	0.631871	0.0513873	0.131911	0.785831		0.369987	0.319923	0.130608
46	0.0647023	0.446307	0.8422	0.0542086	0.327775	0.697966		0.405527	0.323573	0.132098
47	0.0590739	0.52571	0.853329	0.0802671	0.828507	0.776573		0.520577	0.368229	0.150329
48	0.0758289	0.69844	0.864458	0.0805928	0.755023	0.672952		0.524549	0.351956	0.143685
49	0.0400278	0.652745	0.834612	0.0777626	0.666258	0.726028		0.499572	0.34753	0.141878
50	0.06835	0.63377	0.763516	0.102963	0.243716	0.575528		0.397974	0.296724	0.121137
51	0.0707655	0.639708	0.766208	0.148281	0.0800127	0.582814		0.381298	0.31529	0.128717
52	0.0397829	0.545808	0.578977	0.161	0.127881	0.551526		0.334163	0.249468	0.101845
53	0.0539143	0.532352	0.654999	0.201785	0.108913	0.59243		0.357399	0.26551	0.108394
54	0.0537878	0.600752	0.698656	0.222904	0.0742534	0.675318		0.387612	0.303879	0.124058
55	0.0615371	0.652641	0.742313	0.209627	0.189343	0.569696		0.404193	0.28456	0.116171
56	0.0493511	0.767456	0.640748	0.240156	0.300791	0.657063		0.442594	0.285141	0.116408
57	0.0924279	0.716035	0.648026	0.197208	0.851583	0.744429		0.541618	0.31602	0.129015
58	0.119216	0.66184	0.641022	0.255036	0.86397	0.831796		0.562147	0.306748	0.125229
59	0.0915723	0.451715	0.743889	0.265449	0.867967	0.819936		0.540088	0.319924	0.130608
60	0.0976842	0.489131	0.656261	0.240248	0.899768	0.772033		0.525854	0.311021	0.126974
61	0.118913	0.514125	0.648632	0.260752	0.786982	0.646725		0.496022	0.25634	0.10465
62	0.122034	0.609916	0.832005	0.234795	0.512605	0.65232		0.493946	0.267821	0.109338
63	0.170304	0.726201	0.857336	0.252477	0.492845	0.605033		0.517366	0.267618	0.109255
64	0.179068	0.661045	0.870565	0.27016	0.474958	0.603752		0.509925	0.256857	0.104862
65	0.155483	0.642927	0.77491	0.287842	0.586035	0.734828		0.530338	0.251687	0.102751
66	0.182356	0.536547	0.831575	0.305525	0.38256	0.648365		0.481155	0.238189	0.0972402
67	0.198409	0.563956	0.780341	0.323207	0.559811	0.680051		0.517629	0.218644	0.0892609
68	0.152155	0.531817	0.75536	0.34089	0.60703	0.638141		0.504232	0.220438	0.0899934
69	0.232097	0.610891	0.782988	0.358572	0.458116	0.502181		0.490808	0.192564	0.0786141
70	0.312039	0.787767	0.748585	0.376255	0.870714	0.473483		0.594807	0.23641	0.096514
71	0.259617	0.691796	0.682442	0.393937	0.879342	0.391929		0.549844	0.236549	0.0965708
72	0.684744	0.745188	0.764983	0.41162	0.85409	0.62699		0.681269	0.152729	0.0623512
73	0.688839	0.554194	0.398571	0.429302	0.851894	0.480134		0.567156	0.173809	0.0709573
74	0.692934	0.720351	0.447526	0.446985	0.875937	0.651042		0.639129	0.166939	0.0681525
75	0.697029	0.886507	0.554909	0.464667	0.840802	0.732517		0.696072	0.162491	0.0663367
76	0.701124	0.795889	0.672187	0.48235	0.803371	0.525304		0.663371	0.134533	0.0549228
77	0.705219	0.921898	0.789465	0.500032	0.768632	0.681766		0.727835	0.13975	0.0570528
78	0.709314	0.966215	0.740636	0.416367	0.770078	0.629601		0.705368	0.180416	0.0736547
79	0.622133	0.800937	0.686151	0.405201	0.771525	0.699896		0.664307	0.142001	0.0579718
80	0.522334	0.887836	0.617771	0.363529	0.808272	0.662401		0.643691	0.190228	0.0776603
81	0.515872	0.979995	0.635331	0.394497	0.868092	0.612453		0.667707	0.21885	0.0893453
82	0.509409	0.889315	0.700116	0.381052	0.715813	0.635766		0.638579	0.176428	0.0720263
83	0.46102	0.825625	0.788461	0.329548	0.741905	0.533014		0.613262	0.201223	0.0821488
84	0.508741	0.89292	0.870957	0.303176	0.813275	0.616025		0.667515	0.234113	0.0955764
85	0.40708	0.842801	0.83296	0.276883	0.831861	0.665513		0.64285	0.245715	0.100313
86	0.396452	0.766666	0.941504	0.277559	0.75874	0.718358		0.643213	0.252113	0.102925
87	0.345908	0.893393	0.821748	0.27316	0.753182	0.721932		0.634887	0.259872	0.106092
88	0.294077	0.841209	0.940585	0.290897	0.785225	0.69606		0.641342	0.281636	0.114977
89	0.294451	0.812653	0.842804	0.29548	0.785399	0.633688		0.610746	0.254983	0.104096
90	0.285036	0.691811	0.797025	0.357424	0.728595	0.687248		0.59119	0.213999	0.0873645
91	0.310122	0.699426	0.867435	0.333579	0.771905	0.758562		0.623505	0.239914	0.0979446
92	0.32423	0.722614	0.893141	0.362004	0.880916	0.586754		0.628277	0.248173	0.101316
93	0.304648	0.66364	0.835115	0.351953	0.889151	0.653516		0.616337	0.242058	0.0988197
94	0.316742	0.654925	0.875848	0.364736	0.834109	0.638394		0.614126	0.232283	0.0948292
95	0.332721	0.629083	0.830177	0.338276	0.854925	0.450823		0.572667	0.235169	0.0960074
96	0.362426	0.783866	0.88113	0.376656	0.911154	0.506594		0.636971	0.251597	0.102714
97	0.462627	0.585129	0.805979	0.407786	0.912045	0.650147		0.637285	0.194942	0.0795847
98	0.40362	0.629596	0.902805	0.432639	0.903838	0.747572		0.670012	0.220829	0.090153
99	0.378736	0.778953	0.813056	0.488543	0.91901	0.633882		0.668697	0.20659	0.0843401
100	0.522245	0.747015	0.827207	0.542246	0.958701	0.376997		0.662402	0.218014	0.0890038
101	0.513298	0.625006	0.783279	0.538567	0.966036	0.455807		0.646999	0.193405	0.0789575
102	0.459092	0.539748	0.822909	0.550787	0.916296	0.634243		0.653846	0.178558	0.0728961
103	0.417266	0.572191	0.781044	0.536198	0.813582	0.610637		0.62182	0.150921	0.0616134
104	0.681201	0.568247	0.805814	0.553712	0.795836	0.607088		0.66865	0.111561	0.0455445
105	0.657901	0.782523	0.748687	0.615781	0.918167	0.667843		0.731817	0.110093	0.0449455
106	0.636184	0.747476	0.773136	0.675483	0.782361	0.568127		0.697128	0.0853239	0.0348333
107	0.604832	0.53938	0.784211	0.626892	0.843496	0.56673		0.660924	0.123679	0.0504917
108	0.665391	0.72538	0.777369	0.673945	0.902075	0.745194		0.748226	0.0865207	0.0353219
109	0.64939	0.512936	0.758891	0.669115	0.846846	0.782384		0.70326	0.118544	0.0483955
110	0.591088	0.621951	0.82713	0.71734	0.83262	0.795173		0.730884	0.105204	0.0429494
111	0.625941	0.692628	0.665247	0.736549	0.987351	0.56977		0.712914	0.146022	0.0596133
112	0.6673	0.775607	0.732083	0.813502	0.989552	0.572421		0.758411	0.141664	0.0578342
113	0.738404	0.685129	0.748099	0.789574	0.977476	0.713916		0.775433	0.104956	0.0428481
114	0.724958	0.62091	0.765181	0.755277	0.820753	0.704826		0.731984	0.0673038	0.0274767
115	0.675529	0.630255	0.732871	0.777227	0.93419	0.62191		0.728664	0.117065	0.0477916
116	0.700371	0.708479	0.788548	0.80724	0.982455	0.855231		0.807054	0.104429	0.0426331
117	0.756637	0.603454	0.826039	0.80364	0.9631	0.767386		0.786709	0.116454	0.047542
118	0.713014	0.808354	0.878373	0.824898	0.900771	0.854604		0.830002	0.0665344	0.0271626
119	0.721145	0.807154	0.891385	0.827653	0.751267	0.62011		0.769786	0.0944914	0.0385759
120	0.771658	0.659239	0.894847	0.857115	0.709737	0.800394		0.782165	0.0884467	0.0361082
121	0.798803	0.754333	0.908964	0.878254	0.719824	0.559161		0.76989	0.125758	0.0513405
122	0.78794	0.707999	0.813569	0.896466	0.729911	0.820701		0.792765	0.0680093	0.0277647
123	0.785995	0.788899	0.862223	0.890884	0.739998	0.836819		0.81747	0.0558134	0.0227857
124	0.762798	0.813995	0.840854	0.890397	0.750085	0.79437		0.80875	0.0519315	0.0212009
125	0.76607	0.69992	0.827383	0.931394	0.967232	0.860318		0.842053	0.100175	0.0408965
126	0.770544	0.773292	0.837121	0.890817	0.990146	0.747943		0.834977	0.0924464	0.0377411
127	0.764879	0.704199	0.885223	0.911217	0.934099	0.848606		0.841371	0.0895762	0.0365693
128	0.772792	0.85804	0.868789	0.924839	0.973302	0.742981		0.856791	0.087589	0.0357581
129	0.794067	0.762321	0.844651	0.896926	0.983374	0.748031		0.838228	0.0898907	0.0366977
130	0.792945	0.711309	0.634981	0.927411	0.966854	0.741133		0.795772	0.128514	0.0524655
131	0.825375	0.86736	0.70211	0.93491	0.94602	0.779285		0.84251	0.0936725	0.0382417
132	0.842463	0.756932	0.723975	0.954598	0.967279	0.687492		0.822123	0.119199	0.0486628
133	0.849966	0.679518	0.828131	0.961956	0.960845	0.722591		0.833834	0.117498	0.0479682
134	0.851742	0.794781	0.903251	0.93053	0.876793	0.864458		0.870259	0.0465557	0.0190063
135	0.882545	0.642665	0.901346	0.964483	0.767771	0.845771		0.834097	0.114063	0.046566
136	0.900307	0.754613	0.907696	0.976859	0.759905	0.84735		0.857788	0.0881041	0.0359683
137	0.906208	0.782215	0.879849	0.980432	0.752039	0.852163		0.858818	0.0834171	0.0340549
138	0.879712	0.751351	0.845828	0.9812	0.744173	0.86317		0.844239	0.0883391	0.0360643
139	0.872384	0.931452	0.832562	0.995213	0.736307	0.888916		0.876139	0.0881675	0.0359942
140	0.879329	0.833498	0.78669	0.996009	0.728441	0.932368		0.859389	0.0974593	0.0397876
141	0.880761	0.740574	0.817839	0.991749	0.908914	0.940693		0.880088	0.0897905	0.0366568
142	0.887081	0.855101	0.787952	0.992884	0.993565	0.907846		0.904072	0.0801018	0.0327014
143	0.893192	0.924157	0.866964	0.995274	1	0.93368		0.935544	0.0535767	0.0218726
144	0.89444	0.932077	0.872041	0.993711	0.951026	0.949519		0.932136	0.0435497	0.0177791
145	0.887719	0.845945	0.886909	0.995808	0.9922	0.965359		0.92899	0.0634879	0.0259188
146	0.880843	0.81745	0.851854	0.990276	0.999283	0.924704		0.910735	0.0740613	0.0302354
147	0.880767	0.948774	0.834816	0.990941	0.9785	0.896391		0.921698	0.0610219	0.0249121
148	0.875128	0.889457	0.794531	0.993476	0.952137	0.91104		0.902628	0.0683959	0.0279225
149	0.897465	0.884537	0.774603	0.99312	0.998434	0.887501		0.905943	0.0827946	0.0338007
150	0.883209	0.83396	0.849972	0.99607	0.902953	0.88027		0.891072	0.057088	0.0233061
151	0.895606	0.977537	0.910092	0.986655	0.861338	0.922796		0.925671	0.0483793	0.0197508
152	0.900139	0.731851	0.915291	0.982829	0.819723	0.940147		0.881663	0.0910024	0.0371516
153	0.93567	0.967246	0.945772	0.982968	0.778109	0.928727		0.923082	0.0738366	0.0301437
154	0.929837	0.87093	0.846624	0.98605	0.736494	0.952333		0.887045	0.0899499	0.0367219
155	0.936773	0.829827	0.846023	0.994172	0.694879	0.988764		0.88174	0.114901	0.0469082
156	0.93087	0.836714	0.955618	0.99426	0.775891	0.988924		0.913713	0.0884518	0.0361103
157	0.9288	0.816206	0.8643	0.991486	0.856903	0.988838		0.907755	0.0733262	0.0299353
158	0.929276	0.890532	0.939351	0.988486	0.937914	0.988299		0.945643	0.0375751	0.01534
159	0.930188	0.688839	0.970174	0.989983	0.306091	0.980023		0.810883	0.27203	0.111056
160	0.942491	0.89604	0.847983	0.998139		0.977735		0.932478	0.0610882	0.0273195
161	0.940786	0.914729	0.929277	0.996618		0.977332		0.951748	0.0341445	0.0152699
162	0.918657	0.927304	0.876811	0.9981		0.980181		0.94021	0.0489884	0.0219083
163	0.945685	0.867427	0.844612	0.99592		0.915776		0.913884	0.0606253	0.0271124
164	0.959862	0.975696	0.914077	0.997021		0.961327		0.961596	0.0304747	0.0136287
165	0.937914	0.949026	0.931871	1		0.994263		0.962615	0.0321684	0.0143862
166	0.941339	0.75695	0.99434	0.994112		0.990969		0.935542	0.102334	0.0457649
167	0.942034	0.954426	0.971844	0.999585		0.978734		0.969325	0.0222335	0.00994311
168	0.954792	0.792065	1	0.996797		0.986842		0.946099	0.0879454	0.0393304
169	0.957043	0.852781	0.896583	0.998661		1		0.941013	0.0648433	0.0289988
170	0.949831	0.847187	0.895035	0.998976		0.997157		0.937637	0.0660488	0.0295379
171	0.970006	0.76918	0.843127	0.99997		0.989911		0.914439	0.102816	0.0459809
172	0.956292	0.855011	0.890151	0.999833		0.921677		0.924593	0.0563521	0.0252014
173	0.975676	0.871112	0.906906	0.998087		0.987459		0.947848	0.0557495	0.0249319
174	0.958986	0.971363	0.868169	0.997927		0.956875		0.950664	0.0489273	0.021881
175	0.955329	0.94999	0.882762	0.991949		0.92629		0.941264	0.040279	0.0180133
176	0.963021	0.863393	0.839611	0.919945		0.895706		0.896335	0.048238	0.0215727
177	0.94596	0.957286	0.899443	0.847941		0.865121		0.90315	0.048144	0.0215307
178	0.987687	0.98919	0.997758	0.775937				0.937643	0.107895	0.0539477
179	0.984504	0.936843	0.941621	0.703933				0.891725	0.127016	0.0635079
180	0.989651	0.981979	0.901752	0.72757				0.900238	0.121782	0.060891
181	0.990446	0.926155	0.885416	0.751208				0.888306	0.10111	0.0505548
182	0.993101	0.97326	0.880529	0.774846				0.905434	0.0999326	0.0499663
183	0.981612	0.97365	0.923264	0.798483				0.919252	0.084556	0.042278
184	0.985577	0.994278	0.912397	0.822121				0.928593	0.0799173	0.0399587
185	0.994977	0.983496	0.901529	0.850996				0.93275	0.0685708	0.0342854
186	0.989731	0.967459	0.890662	0.882061				0.932478	0.0541359	0.027068
187	0.986292	0.969359	0.879795	0.84947				0.921229	0.0668724	0.0334362
188
189
190
191
192
193
194
195
196
197
198
199
200
201
202
203
204
205
206
207
208
209
210
211
212
213
214
215
216
217
218
219
220
221
222
223
224
225
226
227
228
229
230
231
232
233
234
235
236
237
238
239
240
241
242
243
244
245
246
247
248
249
250
251
252
253
254
255
256
257
258
259
260
261
262
263
264
265
266
267
268
269
270
271
272
273
274
275
276
277
278
279
280
281
282
283
284
285
286
287
288
289	0.740226	0.867874	0.771652	0.77182	1.04652	0.8953		0.848899	0.114268	0.0466495
290	0.819281	0.861018	0.746143	0.92107	0.983094	0.833697		0.860717	0.0826957	0.0337604
291	0.898336	0.90659	0.777234	0.881081	0.919668	0.775841		0.859792	0.0656929	0.026819
292	0.908132	0.988926	0.745484	0.841092	0.886669	0.8452		0.86925	0.0810271	0.0330792
293	0.938807	0.949196	0.735257	0.959269	0.824963	0.874327		0.880303	0.0877963	0.0358427
294	0.853968	0.968628	0.664147	0.970684	0.849245	0.861029		0.861284	0.11185	0.0456627
295	0.844435	0.94547	0.622784	0.982099	0.852633	0.856062		0.85058	0.125111	0.0510765
296	0.834902	0.919671	0.613208	0.96411	0.862259	0.832158		0.837718	0.121439	0.0495772
297	0.821366	0.927968	0.511125	0.946071	0.933657	0.842565		0.830459	0.164759	0.0672624
298	0.839481	0.924334	0.515641	0.957127	0.89581	0.820489		0.825481	0.160169	0.0653887
299	0.822345	0.933929	0.470087	0.975185	0.893581	0.743191		0.806386	0.184233	0.0752128
300	0.886103	0.954538	0.54906	0.972206	0.832012	0.727197		0.820186	0.159876	0.0652691
301	0.886587	0.82772	0.470725	0.970904	0.862808	0.791678		0.801737	0.173143	0.0706853
302	0.922187	0.921319	0.482728	0.954457	0.846692	0.677389		0.800796	0.185136	0.0755813
303	0.934913	0.842289	0.599978	0.958991	0.853757	0.604354		0.799047	0.159021	0.0649201
304	0.897223	0.901797	0.632065	0.94367	0.817893	0.751306		0.823992	0.116529	0.047573
305	0.950324	0.846424	0.640739	0.915755	0.78971	0.53642		0.779895	0.161661	0.0659978
306	0.952281	0.898626	0.727848	0.791946	0.746972	0.769578		0.814542	0.0901734	0.0368131
307	0.969823	0.873164	0.445658	0.932394	0.800898	0.695428		0.786228	0.193431	0.0789678
308	0.963847	0.887112	0.49001	0.872628	0.759596	0.780681		0.792312	0.165804	0.067689
309	0.973099	0.835228	0.511867	0.950479	0.675572	0.791362		0.789601	0.174228	0.0711283
310	0.980088	0.878679	0.492458	0.94213	0.744551	0.909398		0.82455	0.181566	0.0741241
311	0.971137	0.75376	0.646227	0.965894		0.921635		0.851731	0.144921	0.0648105
312	0.952454	0.759207	0.534247	0.979162		0.8716		0.819334	0.180892	0.0808973
313	0.960718	0.754911	0.551607	0.963182		0.620265		0.770137	0.189761	0.0848635
314	0.963239	0.857694	0.531137	0.974567				0.831659	0.207145	0.103573

## Sheet: pause duration
day	B010_raw	B041_raw	B002_raw	B022_raw	B047_raw	B068_raw		MEAN	SD	SEM
0
1
2	0.467935	0.640785	0.912087	0.733395	0.477774	0.365637		0.599602	0.20207	0.0824947
3	0.488969	0.501117	0.761575	0.561121	0.351396	0.351314		0.502582	0.152598	0.0622978
4	0.501889	0.863439	0.774149	0.445704	0.225018	0.694073		0.584045	0.237105	0.0967978
5	0.564501	0.791733	0.906969	0.213565	0.173879	0.418805		0.511575	0.299694	0.122349
6	0.511495	0.90859	0.845954	0.0939078	0.0600603	0.0863111		0.41772	0.393888	0.160804
7	0.259485	0.813654	0.800218	0.100196	0.234791	0		0.368057	0.352728	0.144
8	0.0943036	0.723611	0.712191	0.0652696	0.28728	0.0825666		0.327537	0.312937	0.127756
9	0.0330275	0.567179	0.677574	0.0303433	0.592736	0.271762		0.362104	0.290271	0.118503
10	0	0.860473	0.410348	0.0477142	0.572451	0.338405		0.371565	0.324015	0.132279
11	0.178497	0.895889	0.422062	0	0.589839	0.502402		0.431448	0.314975	0.128588
12	0.295917	0.990092	0.389366	0.0383256	0.376883	0.492995		0.430597	0.314175	0.128261
13	0.526535	0.90839	0.533951	0.157932	0.763095	0.0367171		0.48777	0.337225	0.137671
14	0.473872	0.813893	0.678536	0.270118	0.718269	0.540854		0.582591	0.19612	0.0800657
15	0.499114	0.702768	0.503617	0.402523	0.788891	0.46357		0.560081	0.150836	0.0615786
16	0.579719	0.318983	0.465552	0.54672	0.966679	0.386286		0.54399	0.228736	0.0933812
17	0.660323	0.271673	0.489736	0.664254	0.972577	0.435005		0.582261	0.241609	0.0986363
18	0.733673	0.300165	0.46854	0.648081	0.927716	0.434179		0.585392	0.228463	0.0932697
19	0.678016	0.422726	0.62487	0.726346	0.932134	0.509035		0.648854	0.177967	0.0726548
20	0.76998	0.369214	0.271944	0.82325	0.913959	0.52309		0.611906	0.262012	0.106966
21	0.768354	0.424547	0.0606082	0.85795	0.424481	0.668728		0.534111	0.291922	0.119177
22	0.820052	0.56311	0	0.927692	0.381912	0.712989		0.567626	0.337996	0.137986
23	0.871474	0.545105	0.0490279	0.951156	0.377105	0.822803		0.602779	0.347238	0.141759
24	0.824445	0.520855	0.256292	0.965734	0.372299	0.752814		0.615407	0.276518	0.112888
25	0.873039	0.162546	0.20629	0.964306	0.260696	0.776579		0.540576	0.368446	0.150417
26	0.779842	0.342534	0.327537	0.991564	0.0820908	0.793238		0.552801	0.35168	0.143573
27	0.786697	0.445631	0.394328	0.915671	0.246721	0.814388		0.600573	0.272544	0.111265
28	0.873878	0.324027	0.313523	0.839779	0.542692	0.758828		0.608788	0.2525	0.103083
29	0.862103	0.334613	0.44507	0.736451	0.485106	0.718089		0.596906	0.204372	0.0834343
30	0.879882	0.373578	0.380062	0.633124	0.394266	0.638092		0.549834	0.203837	0.0832163
31	0.894633	0.330308	0.535431	0.529797	0.619133	0.737858		0.60786	0.193721	0.0790864
32	0.818978	0.139325	0.521613	0.426469	0.737702	0.824914		0.578167	0.269488	0.110018
33	0.8516	0.144942	0.440341	0.323142	0.805279	0.806634		0.56199	0.299563	0.122296
34	0.878326	0.0737209	0.374875	0.219815	0.877602	0.725653		0.524999	0.348929	0.14245
35	0.834748	0	0.246409	0.25753	0.851402	0.644672		0.47246	0.353559	0.14434
36	0.79117	0.0629919	0.540631	0.206432	0.71194	0.563691		0.479476	0.286369	0.11691
37	0.790867	0.122749	0.564929	0.254307	0.753929	0.48271		0.494915	0.266881	0.108954
38	0.846116	0.182506	0.54952	0.369579	0.56329	0.401729		0.485456	0.224702	0.091734
39	0.872179	0.855323	0.488857	0.46078	0.966125	0.320747		0.660669	0.268682	0.109689
40	0.928742	0.214238	0.428194	0.524636	0.910091	0.239766		0.540945	0.315303	0.128722
41	0.894653	0.223048	0.367531	0.610409	0.854057	0.0473307		0.499505	0.344225	0.140529
42	0.869188	0.156728	0.599337	0.574748	0.925892	0.0700258		0.532653	0.354811	0.144851
43	0.907507	0.0994678	0.777831	0.657815	0.95727	0.067589		0.577913	0.397048	0.162094
44	0.964371	0.121475	0.809361	0.702184	0.945158	0.124671		0.611203	0.38996	0.159201
45	0.964024	0.297922	0.882849	0.748416	0.951072	0.270704		0.685831	0.3204	0.130803
46	0.985575	0.328026	0.878277	0.778664	0.942302	0.450553		0.727233	0.273632	0.11171
47	0.971108	0.359531	0.825061	0.804896	0.290453	0.325479		0.596088	0.303075	0.12373
48	0.954441	0.621398	0.771844	0.827116	0.578345	0.636011		0.731526	0.145031	0.0592086
49	0.977361	0.377483	0.867743	0.806044	0.831376	0.652632		0.752107	0.211443	0.0863214
50	0.978771	0.323428	0.902301	0.862599	0.767123	0.80347		0.772949	0.232451	0.0948975
51	0.987226	0.394659	0.941567	0.859305	0.927868	0.785445		0.816012	0.218145	0.0890574
52	0.993312	0.697997	0.945447	0.841092	0.924202	0.795202		0.866209	0.10933	0.0446338
53	0.991581	0.550245	0.921315	0.844612	0.952098	0.823119		0.847162	0.158815	0.064836
54	0.994897	0.516984	0.943463	0.854762	0.94952	0.846355		0.850997	0.17353	0.0708435
55	0.994948	0.625129	0.96561	0.858571	0.952838	0.844207		0.873551	0.135866	0.0554669
56	0.978947	0.678459	0.971124	0.877062	0.953583	0.889681		0.891476	0.112641	0.0459853
57	0.969733	0.498754	0.937957	0.920149	0.817148	0.935154		0.846483	0.178114	0.0727148
58	0.979686	0.490759	0.960696	0.897867	0.228799	0.980628		0.756406	0.319629	0.130488
59	0.989146	0.536495	0.951859	0.909345	0.171125	0.977933		0.755984	0.333391	0.136106
60	0.981909	0.534285	0.974905	0.928135	0.287638	0.917563		0.770739	0.290484	0.118589
61	0.987763	0.585674	0.978231	0.87743	0.919324	0.937757		0.88103	0.150181	0.0613113
62	0.972376	0.536896	0.932559	0.916566	0.870184	0.923469		0.858675	0.161003	0.0657294
63	0.961998	0.581994	0.805757	0.904688	0.908222	0.93913		0.850298	0.141882	0.057923
64	0.96733	0.524428	0.97431	0.892809	0.970008	0.942525		0.878569	0.176133	0.0719062
65	0.979136	0.497511	0.959271	0.880931	0.978857	0.928028		0.870622	0.186527	0.0761495
66	0.951324	0.706651	0.922028	0.869052	0.98445	0.940406		0.895652	0.100112	0.0408706
67	0.990371	0.617279	0.968641	0.857174	0.985753	0.937044		0.89271	0.143563	0.0586092
68	0.995685	0.4849	0.958668	0.845295	0.985419	0.944007		0.868996	0.195634	0.0798673
69	0.994417	0.552644	0.909475	0.833417	0.98141	0.859438		0.855133	0.161424	0.065901
70	0.993149	0.683033	0.975585	0.821538	0.926014	0.905194		0.884086	0.11559	0.0471892
71	0.986775	0.700251	0.965819	0.80966	0.688733	0.89063		0.840311	0.129049	0.052684
72	0.490554	0.618847	0.820211	0.797781	0.561802	0.85539		0.690764	0.1531	0.0625029
73	0.480197	0.538371	0.940091	0.785903	0.164523	0.863763		0.628808	0.290725	0.118688
74	0.46984	0.460104	0.945584	0.774024	0.0941922	0.835572		0.596553	0.315433	0.128775
75	0.459482	0.381837	0.962588	0.762146	0.254444	0.787356		0.601309	0.275537	0.112487
76	0.449125	0.737596	0.810575	0.750267	0.320924	0.875675		0.657361	0.220344	0.089955
77	0.438768	0.623041	0.658562	0.738389	0.289826	0.896359		0.607491	0.215781	0.0880923
78	0.428411	0.355303	0.868489	0.82061	0.144913	0.951056		0.594797	0.328711	0.134196
79	0.552082	0.8201	0.867808	0.79161	0	0.932761		0.660727	0.348649	0.142335
80	0.745327	0.961114	0.934751	0.868391	0.0235791	0.937803		0.745161	0.362093	0.147824
81	0.71196	0.874428	0.981854	0.809712	0.59192	0.939901		0.818296	0.146504	0.0598098
82	0.678594	0.85011	0.980959	0.85665	0.902797	0.932178		0.866881	0.104312	0.0425853
83	0.709816	0.909831	0.983086	0.886525	0.888422	0.909586		0.881211	0.0910599	0.037175
84	0.817331	0.759779	0.991329	0.897553	0.905756	0.932645		0.884065	0.082968	0.0338716
85	0.921905	0.738126	0.987318	0.916893	0.556464	0.930883		0.841931	0.163299	0.0666664
86	0.903498	0.693075	0.922895	0.930463	0.129742	0.926189		0.750977	0.317811	0.129746
87	0.971232	0.749102	0.87101	0.950094	0.29132	0.908153		0.790152	0.256652	0.104778
88	0.961267	0.760905	0.88218	0.967806	0.272416	0.902386		0.79116	0.26488	0.108137
89	0.968762	0.854413	0.846195	0.971602	0.339312	0.930061		0.818391	0.240891	0.0983435
90	0.94348	0.799333	0.830233	0.965025	0.253371	0.937058		0.788083	0.270359	0.110374
91	0.948561	0.544188	0.775985	0.989821	0.158016	0.9341		0.725112	0.322675	0.131732
92	0.931009	0.580754	0.828582	0.986396	0.605641	0.948967		0.813558	0.178693	0.0729512
93	0.917003	0.691673	0.902541	0.985564	0.928439	0.942068		0.894548	0.10336	0.0421967
94	0.853688	0.635726	0.837116	0.989699	0.824009	0.942129		0.847061	0.122246	0.0499066
95	0.852558	0.823751	0.704389	0.975517	0.835888	0.938908		0.855168	0.0954946	0.0389855
96	0.852686	0.845672	0.863381	0.977418	0.875969	0.962765		0.896315	0.0582411	0.0237768
97	0.906191	0.722781	0.746378	0.969471	0.852144	0.961606		0.859762	0.106058	0.0432981
98	0.877615	0.702107	0.829317	0.967918	0.886253	0.984808		0.87467	0.102765	0.0419536
99	0.848455	0.931455	0.830071	0.950413	0.898566	0.972201		0.905194	0.0567999	0.0231884
100	0.922403	0.798606	0.851602	0.954809	0.973187	0.924131		0.904123	0.0662809	0.027059
101	0.846128	0.681578	0.777687	0.956662	0.984001	0.914738		0.860133	0.115342	0.047088
102	0.85419	0.779879	0.848598	0.95451	0.76792	0.973885		0.863164	0.0859113	0.0350731
103	0.883129	0.72527	0.814484	0.953924	0.380061	0.907619		0.777414	0.210365	0.0858812
104	0.962488	0.815002	0.729357	0.949765	0.260541	0.939204		0.776059	0.268701	0.109697
105	0.984125	0.839889	0.762708	0.954803	0.771543	0.964834		0.87965	0.10076	0.041135
106	0.981077	0.80065	0.754942	0.982597	0.491717	0.91101		0.820332	0.186033	0.0759478
107	0.980549	0.857195	0.821458	0.977394	0.666499	0.886838		0.864989	0.116465	0.0475466
108	0.984335	0.6165	0.861654	0.987283	0.997408	0.952784		0.899994	0.147545	0.0602349
109	0.975214	0.70981	0.791587	0.972574	0.995861	0.922661		0.894618	0.116943	0.047742
110	0.948245	0.835532	0.832284	0.996105	0.981131	0.985061		0.929726	0.0759224	0.0309952
111	0.969987	0.702333	0.622449	0.98479	0.951062	0.939795		0.861736	0.157226	0.0641874
112	0.958993	0.802159	0.694736	0.997795	0.944305	0.844477		0.873744	0.114595	0.0467831
113	0.96133	0.638914	0.712698	0.986991	0.975499	0.96036		0.872632	0.154548	0.0630941
114	0.958138	0.880618	0.783019	0.954254	0.935267	0.928109		0.906568	0.0665715	0.0271777
115	0.950524	0.782205	0.721069	0.96358	0.959633	0.880321		0.876222	0.102993	0.0420468
116	0.952177	0.528901	0.831359	0.954763	0.912166	0.955554		0.85582	0.167135	0.0682325
117	0.949146	0.758519	0.872015	0.950883	0.863713	0.888634		0.880485	0.0706616	0.0288475
118	0.928658	0.626159	0.777494	0.948928	0.730745	0.969529		0.830252	0.139646	0.0570101
119	0.936922	0.570672	0.954515	0.96816	0.448932	0.879519		0.79312	0.224847	0.0917932
120	0.983383	0.616683	0.92936	0.968655	0.388145	0.902391		0.798103	0.241868	0.0987421
121	0.976616	0.841102	0.953853	0.977879	0.373417	0.897736		0.836767	0.23307	0.0951506
122	0.977623	0.608025	0.920069	0.968459	0.358689	0.868613		0.78358	0.248614	0.101496
123	0.972526	0.63944	0.916943	0.96135	0.343961	0.844827		0.779841	0.246088	0.100465
124	0.970922	0.783929	0.942088	0.949628	0.329233	0.923395		0.816533	0.247894	0.101202
125	0.968348	0.679625	0.942446	0.962604	0.968623	0.889253		0.901817	0.112927	0.0461023
126	0.962591	0.72794	0.904918	0.927822	0.986018	0.909802		0.903182	0.0913839	0.0373073
127	0.933559	0.680103	0.933599	0.936514	0.826889	0.864464		0.862521	0.100123	0.040875
128	0.951797	0.959449	0.937916	0.931216	0.911763	0.849065		0.923534	0.0400968	0.0163695
129	0.941078	0.858774	0.898128	0.920668	0.982354	0.900656		0.916943	0.0421376	0.0172026
130	0.943871	0.877782	0.858183	0.939668	0.956148	0.884095		0.909958	0.0413547	0.016883
131	0.957248	0.861465	0.885728	0.950433	0.93485	0.885608		0.912555	0.0399633	0.016315
132	0.970279	0.835952	0.87794	0.949522	0.921653	0.864231		0.903263	0.0522777	0.0213423
133	0.943756	0.829226	0.950799	0.954298	0.858513	0.90288		0.906579	0.0527678	0.0215424
134	0.962019	0.900037	0.961349	0.91639	0.711931	0.897199		0.891488	0.0925436	0.0377808
135	0.941767	0.704837	0.914368	0.960362	0.500966	0.84097		0.810545	0.177979	0.0726596
136	0.972439	0.821119	0.931328	0.961726	0.465882	0.860796		0.835548	0.190438	0.0777459
137	0.981168	0.843965	0.964678	0.952676	0.430797	0.899157		0.845407	0.209263	0.0854314
138	0.952877	0.79652	0.95762	0.959111	0.395713	0.890728		0.825428	0.219701	0.0896927
139	0.974469	0.789091	0.933666	0.972125	0.360629	0.907312		0.822882	0.23642	0.0965182
140	0.961048	0.735456	0.896946	0.991226	0.325545	0.855695		0.794319	0.246611	0.100678
141	0.974174	0.711775	0.861885	0.985614	0.902584	0.950214		0.897708	0.102186	0.0417172
142	0.975156	0.899932	0.881312	0.978883	0.97468	0.932928		0.940482	0.0425416	0.0173675
143	0.979463	0.763802	0.951534	0.993829	1	0.962802		0.941905	0.0891424	0.0363922
144	0.987026	0.823228	0.946037	0.994533	0.932822	0.956813		0.940077	0.0619541	0.0252926
145	0.975947	0.876825	0.968591	0.991558	0.994764	0.950825		0.959752	0.0436678	0.0178273
146	0.976428	0.774489	0.968202	0.991603	0.995704	0.965353		0.945297	0.0845656	0.0345238
147	0.979821	0.860479	0.942891	0.981898	0.985023	0.966106		0.952703	0.0477776	0.0195051
148	0.981142	0.887642	0.915042	0.97754	0.988561	0.906272		0.9427	0.0445382	0.0181826
149	0.988189	0.842236	0.830398	0.977849	0.99356	0.948752		0.930164	0.0744175	0.0303808
150	0.983507	0.767872	0.937139	0.989097	0.859783	0.981806		0.919867	0.0890955	0.0363731
151	0.978778	0.914967	0.945769	0.979596	0.781311	0.992967		0.932231	0.0791922	0.0323301
152	0.986746	0.700742	0.930979	0.976938	0.702839	0.972869		0.878519	0.138218	0.0564274
153	0.989515	0.854308	0.953718	0.974241	0.624366	0.982013		0.89636	0.14221	0.058057
154	0.989422	0.882166	0.907295	0.990608	0.545894	0.951684		0.877845	0.168342	0.0687252
155	0.992223	0.780533	0.802905	0.989849	0.467422	0.988911		0.836974	0.205657	0.0839589
156	0.981289	0.686568	0.923597	0.984697	0.6396	0.99343		0.868197	0.161468	0.0659192
157	0.988897	0.783051	0.837426	0.990447	0.811779	0.987532		0.899855	0.0991166	0.0404642
158	0.991196	0.839126	0.926883	0.990129	0.983957	0.991775		0.953844	0.0615538	0.0251292
159	0.987087	0.657539	0.974547	0.993809		0.984728		0.919542	0.146627	0.0655737
160	0.990215	0.916212	0.891478	0.997217		0.976249		0.954274	0.0474626	0.0212259
161	0.984019	0.848131	0.966385	0.996484		0.979057		0.954815	0.0606056	0.0271036
162	0.988001	0.950212	0.88341	0.9973		0.997172		0.963219	0.0486494	0.0217567
163	0.989194	0.864995	0.787912	0.995069		0.97788		0.92301	0.092467	0.0413525
164	0.984223	0.991662	0.79588	0.998563		0.997549		0.953575	0.0883392	0.0395065
165	0.983688	0.985422	0.950295	0.999352		0.999384		0.983628	0.0200611	0.00897162
166	0.97913	0.790828	0.992369	0.998282		0.997389		0.9516	0.0901991	0.0403383
167	0.983693	0.967004	1	0.99831		0.9993		0.989661	0.0143489	0.00641703
168	0.987291	0.788533	0.974414	0.997903		0.992284		0.948085	0.0896138	0.0400765
169	0.995044	0.812259	0.892138	0.997767		0.993103		0.938062	0.0833317	0.037267
170	0.995541	0.936408	0.887933	0.999743		0.987232		0.961371	0.0482834	0.021593
171	0.994573	0.90076	0.8811	0.999852		1		0.955257	0.0591727	0.0264628
172	0.977458	0.77691	0.900344	1		0.992257		0.929394	0.0939976	0.042037
173	0.9957	0.930813	0.948949	0.999065		0.953729		0.965651	0.030225	0.013517
174	0.995672	0.591548	0.93944	0.999212		0.956942		0.896563	0.172393	0.0770965
175	0.989127	0.852178	0.938452	0.995225		0.960156		0.947028	0.0577443	0.025824
176	0.997045	0.768986	0.871372	0.92937		0.963369		0.906029	0.0895802	0.0400615
177	0.991946	0.970948	0.790253	0.863515		0.966583		0.916649	0.0864736	0.0386722
178	0.985559	0.802	0.957611	0.79766				0.885708	0.0998328	0.0499164
179	0.997067	1	0.845898	0.731805				0.893692	0.129717	0.0648586
180	0.998307	0.786503	0.906921	0.756403				0.862034	0.111726	0.055863
181	0.999512	0.680496	0.904912	0.781001				0.84148	0.139727	0.0698636
182	1	0.965641	0.927505	0.8056				0.924687	0.084733	0.0423665
183	0.999405	0.720502	0.883692	0.830198				0.858449	0.11595	0.057975
184	0.997459	0.85249	0.856448	0.854796				0.890298	0.0714591	0.0357296
185	0.994318	0.820366	0.829205	0.866975				0.877716	0.0803196	0.0401598
186	0.990676	0.530779	0.801962	0.895056				0.804618	0.198151	0.0990756
187	0.989846	0.619932	0.774718	0.834429				0.804731	0.152972	0.0764858
188
189
190
191
192
193
194
195
196
197
198
199
200
201
202
203
204
205
206
207
208
209
210
211
212
213
214
215
216
217
218
219
220
221
222
223
224
225
226
227
228
229
230
231
232
233
234
235
236
237
238
239
240
241
242
243
244
245
246
247
248
249
250
251
252
253
254
255
256
257
258
259
260
261
262
263
264
265
266
267
268
269
270
271
272
273
274
275
276
277
278
279
280
281
282
283
284
285
286
287
288
289	0.690859	0.238234	0.707308	0.537857	0.765866	0.691523		0.605274	0.195053	0.07963
290	0.614437	0.397105	0.825432	0.68087	0.86219	0.759954		0.689998	0.16998	0.0693939
291	0.538016	0.590914	0.758726	0.759357	0.958514	0.93495		0.756746	0.171942	0.0701952
292	0.622348	0.750958	0.818533	0.837843	0.959027	0.950582		0.823215	0.126864	0.0517918
293	0.71602	0.882152	0.787735	0.857894	0.954308	0.947007		0.857519	0.0926011	0.0378043
294	0.889265	0.763882	0.781872	0.867219	0.97414	0.963843		0.87337	0.0883061	0.0360508
295	0.924269	0.722632	0.869699	0.876543	0.945593	0.982658		0.886899	0.0909923	0.0371475
296	0.959273	0.634798	0.818737	0.913235	0.915973	0.99574		0.872959	0.130888	0.0534348
297	0.992259	0.649801	0.798326	0.952988	0.953118	0.97433		0.886804	0.135321	0.0552444
298	0.993636	0.76505	0.785142	0.969307	0.936444	0.964156		0.902289	0.100387	0.0409829
299	0.988393	0.866423	0.744457	0.95054	0.902241	0.904345		0.892733	0.0841377	0.0343491
300	0.995517	0.896483	0.786427	0.969237	0.868568	0.940132		0.909394	0.076023	0.0310363
301	0.99923	0.903544	0.761643	0.982826	0.849981	0.970529		0.911292	0.0922747	0.037671
302	0.999397	0.893521	0.765334	0.985867	0.864197	0.829317		0.889605	0.0906194	0.0369952
303	0.999531	0.932275	0.800563	0.973023	0.872322	0.853255		0.905162	0.0761045	0.0310695
304	0.990564	0.905246	0.774527	0.987254	0.867344	0.933107		0.909674	0.0814706	0.0332602
305	0.993602	0.935436	0.732094	0.994743	0.887677	0.881093		0.904108	0.0975641	0.0398304
306	0.973817	0.946339	0.79601	0.98789	0.865046	0.768023		0.889521	0.0939314	0.0383473
307	0.952118	0.945135	0.723602	0.988264	0.927292	0.812099		0.891418	0.101676	0.041509
308	0.971864	0.867585	0.743762	0.995762	0.946137	0.825469		0.891763	0.0970281	0.0396116
309	0.97744	0.833829	0.715016	0.987915	0.87157	0.922649		0.884737	0.102223	0.0417322
310	0.961563	0.925847	0.658762	0.988687	0.870767	0.918769		0.887399	0.118974	0.0485708
311	0.957704	0.871121	0.67465	0.993733		0.918756		0.883193	0.125172	0.0559785
312	0.976933	0.844555	0.611647	0.988875		0.83611		0.851624	0.152003	0.0679779
313	0.969963	0.83328	0.624025	0.977189		0.805179		0.841927	0.144564	0.0646511
314	0.945479	0.938772	0.575355	0.993273				0.86322	0.193438	0.096719

## Sheet: Syllable B
Summary
							T1							T1							T1							T2
	time	duration	pause_duration	rep_rate			time	recnum	syllable	duration	pause_duration	rep_rate		time	recnum	syllable	duration	pause_duration	rep_rate		time	recnum	syllable	duration	pause_duration	rep_rate		time	recnum	syllable	duration	pause_duration	rep_rate
AVG	T1 + 15	225.783	75.1869	3.36802
SD	T1 + 15	33.1849	24.6935	0.395319			15	1	B	186	72	3.87597		70	1	B	163	49	4.71698		200	1	B	108.753	35.918	6.91224		30	1	B	133	34	5.98802
SEM	T1 + 15	2.35835	1.75489	0.0280941			15	2	B	198	35	4.29185		70	2	B	176	50	4.42478		200	2	B	128.707	26.9395	6.42482		30	2	B	127	39	6.0241
							15	3	B	230	54	3.52113		70	3	B	170	51	4.52489		200	3	B	124.717	33.9229	6.30359		30	3	B	126	39	6.06061
AVG	T1 + 30	194.5	47.7841	4.14711			15	4	B	220	95	3.1746		70	4	B	168	38	4.85437		200	4	B	126.712	32.9248	6.26422		30	4	B	125	39	6.09756
SD	T1 + 30	15.0428	11.9923	0.291439			15	5	B	183	92	3.63636		70	5	B	179	71	4		200	5	B	149.66	29.9316	5.56818		30	5	B	124	33	6.36943
SEM	T1 + 30	1.13389	0.903956	0.0219681			15	6	B	175	84	3.861		70	6	B	172	63	4.25532		200	6	B	138.685	34.9209	5.76019		30	7	B	140	30	5.88235
							15	7	B	212	109	3.11526		70	8	B	188	47	4.25532		200	7	B	146.667	24.9434	5.82715		30	8	B	145	34	5.58659
AVG	T1 + 200	147.522	38.1873	5.41046			15	8	B	200	97	3.367		70	9	B	180	66	4.06504		200	8	B	139.683	31.9277	5.82715		30	9	B	146	35	5.52486
SD	T1 + 200	11.3694	6.72379	0.381868			15	9	B	209	98	3.25733		70	10	B	180	62	4.13223		200	9	B	140.68	29.9316	5.86124		30	10	B	144	34	5.61798
SEM	T1 + 200	0.706461	0.417796	0.0237281			15	10	B	210	90	3.33333		70	11	B	170	43	4.69484		200	10	B	139.683	28.9346	5.93059		30	11	B	145	37	5.49451
							15	11	B	198	85	3.53357		70	12	B	203	66	3.71747		200	11	B	151.655	19.9551	5.82712		30	12	B	144	37	5.52486
AVG	T2 + 30	147.901	36.7917	5.44436			15	12	B	185	109	3.40136		70	14	B	194	43	4.21941		200	12	B	146.667	26.9395	5.76019		30	13	B	144	32	5.68182
SD	T2 + 30	13.258	6.7147	0.418503			15	13	B	200	81	3.55872		70	15	B	193	54	4.04858		200	13	B	160.635	23.9453	5.4177		30	14	B	151	34	5.40541
SEM	T2 + 30	0.956816	0.484592	0.0302029			15	14	B	208	98	3.26797		70	16	B	193	49	4.13223		200	14	B	150.658	24.9434	5.69471		30	15	B	152	38	5.26316
							15	15	B	207	90	3.367		70	17	B	195	70	3.77358		200	15	B	148.662	35.918	5.4177		30	16	B	153	43	5.10204
							15	16	B	179	74	3.95257		70	18	B	180	59	4.1841		200	16	B	145.669	32.9258	5.5993		30	18	B	149	30	5.58659
							15	17	B	240	99	2.94985		70	19	B	188	63	3.98406		200	17	B	153.651	24.9453	5.59924		30	19	B	151	31	5.49451
							15	18	B	213	85	3.3557		70	21	B	193	36	4.36681		200	18	B	159.637	22.9473	5.47693		30	20	B	147	34	5.52486
							15	19	B	270	92	2.76243		70	22	B	194	33	4.40529		200	19	B	150.658	27.9355	5.5993		30	21	B	151	36	5.34759
							15	20	B	256	103	2.78552		70	23	B	204	47	3.98406		200	20	B	150.658	23.9453	5.72726		30	22	B	147	34	5.52486
							15	22	B	104	131	4.25532		70	24	B	207	45	3.96825		200	21	B	151.655	29.9316	5.50698		30	23	B	150	31	5.52486
							15	23	B	175	130	3.27869		70	26	B	165	46	4.73934		200	22	B	149.66	34.9199	5.4177		30	25	B	147	27	5.74713
							15	24	B	190	122	3.20513		70	27	B	181	44	4.44444		200	23	B	145.669	35.918	5.50703		30	26	B	153	24	5.64972
							15	25	B	125	119	4.09836		70	28	B	181	57	4.20168		200	24	B	153.651	27.9355	5.50703		30	27	B	146	32	5.61798
							15	26	B	223	78	3.32226		70	30	B	187	47	4.2735		200	25	B	146.667	32.9277	5.56812		30	29	B	148	26	5.74713
							15	27	B	205	141	2.89017		70	31	B	187	73	3.84615		200	26	B	115.737	37.9141	6.50826		30	30	B	143	28	5.84795
							15	28	B	141	179	3.125		70	33	B	193	53	4.06504		200	27	B	117.732	41.9048	6.2642		30	33	B	109	48	6.36943
							15	29	B	146	96	4.13223		70	35	B	191	50	4.14938		200	28	B	120.726	40.9072	6.18686		30	34	B	118	47	6.06061
							15	31	B	218	82	3.33333		70	37	B	189	48	4.21941		200	29	B	116.735	50.8838	5.96592		30	35	B	112	46	6.32911
							15	32	B	189	81	3.7037		70	38	B	187	50	4.21941		200	30	B	114.739	45.896	6.22528		30	36	B	120	37	6.36943
							15	33	B	192	80	3.67647		70	39	B	192	55	4.04858		200	31	B	126.712	27.9365	6.46628		30	37	B	116	42	6.32911
							15	34	B	212	93	3.27869		70	41	B	196	52	4.03226		200	32	B	144.671	24.9434	5.89571		30	39	B	131	59	5.26316
							15	35	B	191	88	3.58423		70	42	B	191	62	3.95257		200	33	B	143.673	29.9321	5.76019		30	40	B	126	26	6.57895
							15	36	B	198	83	3.55872		70	44	B	194	39	4.29185		200	34	B	146.667	41.9048	5.30303		30	41	B	141	37	5.61798
							15	37	B	198	113	3.21543		70	46	B	187	41	4.38596		200	35	B	127.71	31.9272	6.2642		30	42	B	145	47	5.20833
							15	38	B	222	100	3.10559		70	47	B	189	40	4.36681		200	36	B	140.68	39.9097	5.53741		30	43	B	131	30	6.21118
							15	39	B	176	108	3.52113		70	53	B	174	46	4.54545		200	37	B	134.694	48.8892	5.44713		30	45	B	142	50	5.20833
							15	40	B	212	87	3.34448		70	54	B	168	37	4.87805		200	38	B	135.692	37.9131	5.76022		30	46	B	132	30	6.17284
							15	41	B	232	99	3.02115		70	55	B	177	11	5.31915		200	39	B	146.667	31.9268	5.5993		30	47	B	143	37	5.55556
							15	42	B	201	86	3.48432		70	56	B	201	43	4.09836		200	40	B	143.673	26.9385	5.86124		30	48	B	148	29	5.64972
							15	43	B	226	101	3.0581		70	58	B	180	42	4.5045		200	41	B	138.685	33.9229	5.79349		30	49	B	147	40	5.34759
							15	44	B	189	85	3.64964		70	59	B	182	33	4.65116		200	42	B	150.658	21.9512	5.79346		30	50	B	150	29	5.58659
							15	45	B	192	109	3.32226		70	60	B	181	71	3.96825		200	43	B	144.671	31.9277	5.66256		30	52	B	148	20	5.95238
							15	46	B	229	91	3.125		70	61	B	185	47	4.31034		200	44	B	143.673	29.9316	5.76019		30	53	B	147	23	5.88235
							15	47	B	198	93	3.43643		70	62	B	186	41	4.40529		200	45	B	142.676	29.9316	5.79349		30	54	B	152	26	5.61798
							15	48	B	223	51	3.64964		70	63	B	191	43	4.2735		200	46	B	147.664	30.9297	5.5993		30	55	B	143	30	5.78035
							15	49	B	257	69	3.06748		70	64	B	171	36	4.83092		200	47	B	144.671	25.9395	5.86128		30	57	B	149	20	5.91716
							15	50	B	257	85	2.92398		70	65	B	193	41	4.2735		200	48	B	150.658	25.9414	5.66253		30	58	B	156	21	5.64972
							15	51	B	245	48	3.41297		70	66	B	199	52	3.98406		200	49	B	146.667	34.9199	5.50703		30	59	B	146	31	5.64972
							15	52	B	251	61	3.20513		70	67	B	184	32	4.62963		200	50	B	133.696	37.916	5.82712		30	61	B	152	30	5.49451
							15	53	B	273	103	2.65957		70	68	B	209	53	3.81679		200	51	B	146.667	36.916	5.44716		30	64	B	115	51	6.0241
							15	54	B	249	86	2.98507		70	69	B	176	50	4.42478		200	52	B	121.723	39.9082	6.1869		30	65	B	113	37	6.66667
							15	55	B	259	92	2.849		70	70	B	186	72	3.87597		200	53	B	118.73	43.9004	6.14889		30	66	B	117	43	6.25
							15	56	B	221	38	3.861		70	71	B	176	49	4.44444		200	54	B	117.732	36.916	6.46628		30	67	B	108	39	6.80272
							15	57	B	227	98	3.07692		70	72	B	187	62	4.01606		200	55	B	116.735	40.9062	6.3435		30	68	B	119	33	6.57895
							15	58	B	240	97	2.96736		70	73	B	172	40	4.71698		200	56	B	124.717	44.8965	5.89576		30	69	B	117	42	6.28931
							15	59	B	192	85	3.61011		70	74	B	204	42	4.06504		200	57	B	132.698	25.9414	6.30356		30	70	B	116	36	6.57895
							15	61	B	246	91	2.96736		70	75	B	195	41	4.23729		200	58	B	141.678	42.9023	5.4177		30	71	B	115	42	6.36943
							15	62	B	225	46	3.69004		70	76	B	205	42	4.04858		200	59	B	132.698	41.9043	5.72726		30	72	B	122	36	6.32911
							15	63	B	240	33	3.663		70	77	B	203	42	4.08163		200	60	B	134.694	38.9121	5.76019		30	73	B	125	47	5.81395
							15	64	B	345	102	2.23714		70	78	B	195	42	4.21941		200	61	B	137.687	41.9043	5.56818		30	74	B	117	40	6.36943
							15	65	B	198	75	3.663		70	79	B	207	45	3.96825		200	62	B	133.696	45.8965	5.56818		30	75	B	126	39	6.06061
							15	67	B	188	102	3.44828		70	80	B	202	37	4.1841		200	63	B	127.71	42.9023	5.86128		30	76	B	139	45	5.43478
							15	68	B	209	49	3.87597		70	81	B	206	14	4.54545		200	64	B	132.698	36.916	5.8957		30	77	B	135	29	6.09756
							15	69	B	244	45	3.46021		70	82	B	221	57	3.59712		200	65	B	138.685	35.918	5.72726		30	78	B	151	35	5.37634
							15	70	B	227	81	3.24675		70	83	B	197	25	4.5045		200	66	B	163.628	45.8945	4.77274		30	79	B	140	51	5.2356
							15	71	B	219	79	3.3557		70	84	B	190	48	4.20168		200	67	B	139.683	44.8984	5.4177		30	80	B	141	43	5.43478
							15	72	B	206	81	3.48432		70	85	B	202	43	4.08163		200	68	B	145.669	39.9102	5.38857		30	81	B	145	40	5.40541
							15	73	B	198	96	3.40136		70	86	B	202	38	4.16667		200	69	B	143.673	48.8887	5.19312		30	82	B	137	45	5.49451
							15	74	B	184	94	3.59712		70	87	B	196	39	4.25532		200	70	B	142.676	35.918	5.5993		30	83	B	139	37	5.68182
							15	76	B	213	93	3.26797		70	88	B	201	47	4.03226		200	71	B	132.698	44.8984	5.6307		30	84	B	138	58	5.10204
							15	77	B	223	50	3.663		70	89	B	206	36	4.13223		200	72	B	156.644	34.9199	5.22018		30	85	B	133	46	5.58659
							15	78	B	276	52	3.04878		70	90	B	197	53	4		200	73	B	180.59	32.9238	4.68354		30	86	B	141	49	5.26316
							15	79	B	245	46	3.43643		70	91	B	210	29	4.1841		200	74	B	170.612	39.9102	4.75011		30	87	B	138	43	5.52486
							15	80	B	239	55	3.40136		70	92	B	204	51	3.92157		200	75	B	169.615	32.9238	4.93732		30	88	B	135	48	5.46448
							15	81	B	216	89	3.27869		70	93	B	221	31	3.96825		200	76	B	143.673	29.9316	5.76019		30	89	B	138	38	5.68182
							15	82	B	225	52	3.61011		70	94	B	200	51	3.98406		200	77	B	158.639	27.9375	5.35974		30	90	B	143	38	5.52486
							15	83	B	233	94	3.0581		70	95	B	210	40	4		200	78	B	151.655	30.9297	5.47687		30	91	B	146	48	5.15464
							15	84	B	202	61	3.80228		70	96	B	213	40	3.95257		200	79	B	147.664	37.9141	5.38857		30	92	B	147	30	5.64972
							15	85	B	240	89	3.03951		70	97	B	192	46	4.20168		200	80	B	139.683	40.9082	5.53741		30	93	B	155	32	5.34759
							15	87	B	266	88	2.82486		70	98	B	226	24	4		200	81	B	161.633	37.9141	5.01135		30	94	B	146	50	5.10204
							15	88	B	215	38	3.95257		70	99	B	229	22	3.98406		200	82	B	144.671	31.9277	5.66253		30	95	B	142	35	5.64972
							15	89	B	281	88	2.71003		70	100	B	195	88	3.53357		200	83	B	141.678	38.9102	5.53747		30	96	B	156	35	5.2356
							15	90	B	256	96	2.84091		70	101	B	188	30	4.58716		200	84	B	144.671	34.9199	5.56818		30	97	B	145	39	5.43478
							15	91	B	224	50	3.64964		70	102	B	215	33	4.03226		200	85	B	168.617	30.9297	5.01135		30	98	B	152	35	5.34759
							15	93	B	235	36	3.69004		70	103	B	213	30	4.11523		200	86	B	160.635	35.9199	5.08764		30	99	B	155	42	5.07614
							15	94	B	306	39	2.89855		70	104	B	211	58	3.71747		200	87	B	152.653	29.9316	5.47693		30	100	B	148	37	5.40541
							15	95	B	250	48	3.3557		70	105	B	188	40	4.38596		200	88	B	149.66	36.916	5.35974		30	101	B	149	42	5.2356
							15	96	B	236	83	3.1348		70	106	B	223	52	3.63636		200	89	B	154.649	36.916	5.22018		30	102	B	140	39	5.58659
							15	97	B	248	100	2.87356		70	107	B	183	54	4.21941		200	90	B	152.653	32.9258	5.38857		30	103	B	150	33	5.46448
							15	98	B	202	40	4.13223		70	108	B	208	61	3.71747		200	91	B	147.664	38.9121	5.35974		30	104	B	152	31	5.46448
							15	99	B	281	95	2.65957		70	109	B	218	20	4.20168		200	92	B	140.68	40.9082	5.50698		30	105	B	156	33	5.29101
							15	101	B	269	91	2.77778		70	110	B	192	58	4		200	93	B	136.689	38.9102	5.69477		30	106	B	152	32	5.43478
							15	102	B	223	80	3.30033		70	111	B	198	65	3.80228		200	94	B	144.671	34.9199	5.56818		30	107	B	158	37	5.12821
							15	103	B	252	107	2.78552		70	112	B	189	66	3.92157		200	95	B	156.644	37.9141	5.13984		30	108	B	147	33	5.55556
							15	104	B	229	45	3.64964		70	113	B	220	42	3.81679		200	96	B	140.68	44.8984	5.38857		30	109	B	147	30	5.64972
							15	105	B	233	88	3.11526		70	114	B	180	52	4.31034		200	97	B	160.635	5.98633	6.00164		30	110	B	145	34	5.58659
							15	106	B	191	77	3.73134		70	115	B	213	42	3.92157		200	98	B	140.68	43.9023	5.41765		30	111	B	147	40	5.34759
							15	107	B	191	50	4.14938		70	116	B	203	45	4.03226		200	99	B	146.667	41.9043	5.30306		30	112	B	135	32	5.98802
							15	109	B	240	56	3.37838		70	117	B	211	50	3.83142		200	100	B	146.667	43.9004	5.24751		30	113	B	149	29	5.61798
							15	110	B	300	59	2.78552		70	118	B	205	57	3.81679		200	101	B	142.676	34.9219	5.6307		30	114	B	153	46	5.02513
							15	111	B	201	102	3.30033		70	119	B	188	60	4.03226		200	102	B	156.644	32.9238	5.27514		30	115	B	140	43	5.46448
							15	112	B	218	69	3.48432		70	120	B	186	14	5		200	103	B	159.637	37.9141	5.06199		30	116	B	150	44	5.15464
							15	113	B	215	97	3.20513		70	121	B	219	33	3.96825		200	104	B	139.683	36.918	5.66253		30	117	B	148	39	5.34759
							15	114	B	210	72	3.5461		70	122	B	246	53	3.34448		200	105	B	154.649	28.9336	5.44716		30	118	B	147	34	5.52486
							15	115	B	238	50	3.47222		70	123	B	200	49	4.01606		200	106	B	152.653	33.9238	5.35974		30	119	B	155	34	5.29101
							15	116	B	227	52	3.58423		70	124	B	211	38	4.01606		200	107	B	158.639	36.916	5.11366		30	120	B	158	33	5.2356
							15	117	B	276	45	3.11526		70	125	B	202	42	4.09836		200	108	B	152.653	33.9238	5.35974		30	121	B	158	30	5.31915
							15	118	B	233	54	3.48432		70	126	B	213	72	3.50877		200	109	B	156.644	40.9062	5.06199		30	122	B	156	47	4.92611
							15	119	B	289	50	2.94985		70	127	B	202	37	4.1841		200	110	B	147.664	34.9219	5.47687		30	123	B	145	32	5.64972
							15	120	B	281	38	3.1348		70	128	B	215	44	3.861		200	111	B	160.635	36.916	5.06199		30	124	B	153	33	5.37634
							15	121	B	262	44	3.26797		70	129	B	206	62	3.73134		200	112	B	158.639	35.9199	5.13984		30	125	B	160	34	5.15464
							15	122	B	265	52	3.15457		70	130	B	217	48	3.77358		200	113	B	151.655	36.9141	5.30306		30	126	B	154	36	5.26316
							15	123	B	284	68	2.84091		70	131	B	198	36	4.2735		200	114	B	159.637	34.9219	5.13984		30	127	B	151	31	5.49451
							15	124	B	254	104	2.7933		70	132	B	204	53	3.89105		200	115	B	152.653	36.916	5.27514		30	128	B	161	30	5.2356
							15	125	B	254	31	3.50877		70	133	B	206	48	3.93701		200	116	B	170.612	34.9219	4.86539		30	129	B	157	36	5.18135
							15	126	B	235	105	2.94118		70	135	B	175	40	4.65116		200	117	B	152.653	36.918	5.27509		30	130	B	154	35	5.29101
							15	127	B	217	46	3.80228		70	136	B	175	58	4.29185		200	118	B	153.651	45.8945	5.0114		30	131	B	158	27	5.40541
							15	128	B	190	63	3.95257		70	137	B	164	52	4.62963		200	119	B	169.615	37.9141	4.8186		30	132	B	164	35	5.02513
							15	130	B	220	45	3.77358		70	139	B	196	34	4.34783		200	120	B	150.658	37.9121	5.30306		30	133	B	160	33	5.18135
							15	131	B	191	59	4		70	140	B	202	51	3.95257		200	121	B	149.66	38.9141	5.30295		30	134	B	150	29	5.58659
							15	132	B	255	94	2.86533		70	141	B	174	61	4.25532		200	122	B	151.655	47.8867	5.01145		30	135	B	158	29	5.34759
							15	133	B	237	88	3.07692		70	143	B	188	53	4.14938		200	123	B	147.664	32.9258	5.53741		30	136	B	154	35	5.29101
							15	135	B	207	77	3.52113		70	144	B	193	38	4.329		200	124	B	164.626	35.9219	4.98637		30	137	B	156	34	5.26316
							15	136	B	194	42	4.23729		70	145	B	200	43	4.11523		200	125	B	143.673	41.9062	5.38857		30	138	B	160	30	5.26316
							15	137	B	254	93	2.88184		70	146	B	197	40	4.21941		200	126	B	144.671	44.8945	5.2752		30	139	B	159	31	5.26316
							15	138	B	236	40	3.62319		70	147	B	192	57	4.01606		200	127	B	140.68	41.9062	5.47687		30	140	B	157	43	5
							15	139	B	247	88	2.98507		70	148	B	187	55	4.13223		200	128	B	148.662	41.9023	5.24751		30	141	B	149	33	5.49451
							15	140	B	222	84	3.26797		70	149	B	189	52	4.14938		200	129	B	148.662	47.8906	5.08764		30	142	B	160	30	5.26316
							15	141	B	191	93	3.52113		70	150	B	200	59	3.861		200	130	B	149.66	44.8984	5.13984		30	143	B	156	36	5.20833
							15	142	B	248	92	2.94118		70	151	B	196	50	4.06504		200	131	B	147.664	38.9102	5.3598		30	144	B	155	33	5.31915
							15	143	B	191	49	4.16667		70	152	B	197	42	4.1841		200	132	B	151.655	46.8945	5.03649		30	145	B	155	36	5.2356
							15	144	B	268	98	2.73224		70	153	B	215	56	3.69004		200	133	B	146.667	49.8828	5.08774		30	146	B	152	39	5.2356
							15	145	B	208	92	3.33333		70	154	B	199	57	3.90625		200	134	B	132.698	49.8867	5.4769		30	147	B	157	42	5.02513
							15	146	B	235	88	3.09598		70	155	B	199	60	3.861		200	135	B	120.726	43.8994	6.07439		30	148	B	150	33	5.46448
							15	147	B	228	87	3.1746		70	156	B	187	43	4.34783		200	136	B	137.687	50.8838	5.30303		30	149	B	155	33	5.31915
							15	148	B	219	92	3.21543		70	157	B	198	50	4.03226		200	137	B	131.701	27.9365	6.26418		30	150	B	157	34	5.2356
							15	149	B	195	83	3.59712		70	158	B	211	49	3.84615		200	138	B	142.676	40.9062	5.44716		30	151	B	160	35	5.12821
							15	150	B	262	45	3.25733		70	159	B	187	46	4.29185		200	139	B	131.701	29.9326	6.18686		30	152	B	156	35	5.2356
							15	151	B	275	57	3.01205		70	160	B	202	58	3.84615		200	140	B	134.694	45.8955	5.53741		30	153	B	164	29	5.18135
							15	152	B	255	42	3.367		70	161	B	203	46	4.01606		200	141	B	120.726	44.8984	6.03777		30	154	B	161	32	5.18135
							15	153	B	240	85	3.07692		70	162	B	203	55	3.87597		200	142	B	126.712	46.8926	5.76022		30	155	B	160	29	5.29101
							15	154	B	251	54	3.27869		70	163	B	202	45	4.04858		200	143	B	142.676	30.9297	5.76019		30	156	B	158	37	5.12821
							15	155	B	256	59	3.1746		70	164	B	202	56	3.87597		200	144	B	160.635	33.9229	5.13987		30	157	B	157	35	5.20833
							15	156	B	242	95	2.96736		70	165	B	200	50	4		200	145	B	153.651	40.9072	5.13987		30	158	B	157	35	5.20833
							15	157	B	230	57	3.48432		70	166	B	196	66	3.81679		200	146	B	155.646	33.9229	5.27511		30	159	B	161	35	5.10204
							15	158	B	212	68	3.57143		70	167	B	189	43	4.31034		200	147	B	162.63	38.9111	4.96175		30	160	B	157	32	5.29101
							15	159	B	202	43	4.08163		70	168	B	211	54	3.77358		200	148	B	171.61	33.9229	4.86539		30	161	B	161	36	5.07614
							15	160	B	260	72	3.01205		70	169	B	201	52	3.95257		200	149	B	146.667	39.9092	5.35974		30	162	B	163	36	5.02513
							15	161	B	267	87	2.82486		70	170	B	204	44	4.03226		200	150	B	146.667	37.9131	5.4177		30	163	B	160	29	5.29101
							15	162	B	205	95	3.33333		70	171	B	194	50	4.09836		200	151	B	149.66	32.9248	5.4769		30	164	B	163	39	4.9505
							15	163	B	212	90	3.31126		70	172	B	201	53	3.93701		200	152	B	150.658	42.9033	5.16634		30	165	B	157	34	5.2356
							15	165	B	197	87	3.52113		70	173	B	206	45	3.98406		200	153	B	146.667	31.9268	5.5993		30	166	B	159	37	5.10204
							15	166	B	229	41	3.7037		70	174	B	206	47	3.95257		200	154	B	147.664	30.9297	5.5993		30	167	B	159	35	5.15464
							15	167	B	292	89	2.62467		70	176	B	209	37	4.06504		200	155	B	152.653	41.9043	5.13987		30	168	B	159	35	5.15464
							15	168	B	240	48	3.47222		70	177	B	207	39	4.06504		200	156	B	136.689	43.9004	5.53741		30	169	B	159	33	5.20833
							15	169	B	243	51	3.40136		70	178	B	205	37	4.13223		200	157	B	144.671	48.8896	5.16634		30	170	B	176	33	4.78469
							15	170	B	215	88	3.30033		70	179	B	203	40	4.11523		200	158	B	142.676	36.916	5.56818		30	171	B	156	38	5.15464
							15	171	B	251	86	2.96736		70	180	B	211	37	4.03226		200	159	B	154.649	39.9092	5.13987		30	172	B	157	36	5.18135
							15	172	B	218	49	3.74532		70	181	B	211	38	4.01606		200	160	B	146.667	44.8975	5.22018		30	173	B	166	34	5
							15	173	B	239	87	3.06748		70	182	B	207	45	3.96825		200	161	B	136.689	36.916	5.76019		30	174	B	157	41	5.05051
							15	174	B	217	85	3.31126		70	184	B	176	50	4.42478		200	162	B	154.649	35.9189	5.24749		30	175	B	147	39	5.37634
							15	176	B	224	41	3.77358		70	185	B	160	59	4.56621		200	163	B	142.676	33.9229	5.66256		30	176	B	155	38	5.18135
							15	177	B	284	52	2.97619		70	186	B	185	42	4.40529		200	164	B	156.644	42.9023	5.01138		30	177	B	165	30	5.12821
							15	178	B	283	49	3.01205		70	187	B	178	51	4.36681		200	165	B	147.664	36.917	5.41767		30	178	B	159	43	4.9505
							15	179	B	236	47	3.53357		70	189	B	179	56	4.25532		200	166	B	141.678	38.9111	5.53744		30	179	B	155	37	5.20833
							15	180	B	242	56	3.3557		70	190	B	206	40	4.06504		200	167	B	150.658	42.9023	5.16634		30	180	B	166	44	4.7619
							15	182	B	151	55	4.85437		70	192	B	183	54	4.21941		200	168	B	146.667	48.8887	5.11366		30	181	B	151	35	5.37634
							15	183	B	231	49	3.57143		70	193	B	204	32	4.23729		200	169	B	145.669	36.918	5.47687		30	182	B	163	47	4.7619
							15	184	B	222	49	3.69004		70	194	B	195	37	4.31034		200	170	B	155.646	39.9082	5.11366		30	183	B	141	52	5.18135
							15	185	B	247	72	3.1348		70	195	B	172	55	4.40529		200	171	B	161.633	35.9199	5.06194		30	184	B	152	40	5.20833
							15	186	B	195	51	4.06504		70	197	B	165	57	4.5045		200	172	B	150.658	40.9062	5.22018		30	185	B	157	43	5
							15	187	B	238	87	3.07692		70	198	B	160	64	4.46429		200	173	B	154.649	41.9043	5.08769		30	186	B	156	43	5.02513
							15	188	B	188	94	3.5461		70	199	B	161	68	4.36681		200	174	B	143.673	41.9043	5.38857		30	187	B	159	47	4.85437
							15	189	B	186	97	3.53357		70	201	B	163	62	4.44444		200	175	B	150.658	33.9219	5.4177		30	188	B	153	47	5
							15	190	B	179	100	3.58423		70	202	B	173	80	3.95257		200	176	B	157.642	35.918	5.16634		30	189	B	150	44	5.15464
							15	191	B	215	97	3.20513									200	177	B	165.624	36.916	4.93732		30	190	B	162	36	5.05051
							15	192	B	192	79	3.69004			AVG		194.5	47.7841	4.14711		200	178	B	147.664	39.9102	5.33122		30	191	B	174	37	4.73934
							15	193	B	205	47	3.96825			SD		15.0428	11.9923	0.291439		200	179	B	144.671	32.9238	5.63077		30	192	B	162	37	5.02513
							15	194	B	237	101	2.95858			SEM		1.13389	0.903956	0.0219681		200	180	B	145.669	43.9023	5.27509		30	193	B	159	42	4.97512
							15	195	B	192	46	4.20168									200	181	B	143.673	37.9121	5.50703		30	194	B	159	46	4.87805
							15	196	B	206	35	4.14938									200	182	B	173.605	44.8984	4.57658		30	195	B	151	47	5.05051
							15	197	B	236	53	3.46021									200	183	B	142.676	36.916	5.56818		30	196	B	153	39	5.20833
							15	198	B	223	62	3.50877									200	184	B	138.685	41.9043	5.53741		30	197	B	166	39	4.87805
							15	200	B	217	45	3.81679									200	185	B	162.63	35.918	5.03654		30	198	B	161	33	5.15464
							15	201	B	262	45	3.25733									200	186	B	159.637	37.9141	5.06199		30	199	B	161	36	5.07614
							15	202	B	265	54	3.1348									200	187	B	149.66	35.918	5.38857		30	200	B	163	48	4.73934
							15	203	B	293	78	2.69542									200	188	B	153.651	36.916	5.24751		30	201	B	151	37	5.31915
							15	204	B	215	48	3.80228									200	189	B	155.646	39.9102	5.11361		30	202	B	155	40	5.12821
							15	205	B	279	75	2.82486									200	190	B	153.651	45.8965	5.01135		30	203	B	165	48	4.69484
							15	206	B	211	77	3.47222									200	191	B	147.664	49.8867	5.06199		30	204	B	152	41	5.18135
							15	207	B	209	39	4.03226									200	192	B	145.669	37.9141	5.44716		30	205	B	152	43	5.12821
							15	208	B	241	43	3.52113									200	193	B	149.66	30.9297	5.53741
							15	209	B	248	44	3.42466									200	194	B	149.66	36.916	5.35974			AVG		147.901	36.7917	5.44436
							15	210	B	247	51	3.3557									200	195	B	145.669	40.9082	5.35974			SD		13.258	6.7147	0.418503
							15	211	B	231	57	3.47222									200	196	B	164.626	40.9082	4.86539			SEM		0.956816	0.484592	0.0302029
							15	212	B	229	86	3.1746									200	197	B	154.649	47.8906	4.93732
							15	213	B	215	101	3.16456									200	198	B	146.667	45.8965	5.19312
																					200	199	B	143.673	42.9023	5.35974
								AVG		225.783	75.1869	3.36802									200	200	B	144.671	46.8926	5.22018
								SD		33.1849	24.6935	0.395319									200	201	B	150.658	38.9102	5.27514
								SEM		2.35835	1.75489	0.0280941									200	202	B	158.639	38.9121	5.06199
																					200	203	B	145.669	36.918	5.47687
																					200	204	B	167.619	44.8984	4.70549
																					200	205	B	157.642	43.8984	4.96177
																					200	206	B	146.667	35.9199	5.47687
																					200	207	B	152.653	46.8926	5.0114
																					200	208	B	148.662	44.8984	5.16634
																					200	209	B	151.655	41.9043	5.16634
																					200	210	B	156.644	37.9141	5.13984
																					200	211	B	149.66	40.9062	5.24751
																					200	212	B	157.642	41.9043	5.01135
																					200	213	B	155.646	40.9062	5.08769
																					200	214	B	154.649	42.9023	5.06199
																					200	215	B	148.662	45.8965	5.13984
																					200	216	B	149.66	42.9023	5.19312
																					200	217	B	147.664	46.8926	5.13989
																					200	218	B	156.644	36.916	5.16634
																					200	219	B	155.646	30.9297	5.35974
																					200	220	B	160.635	42.9023	4.91311
																					200	221	B	155.646	41.9043	5.06199
																					200	222	B	157.642	49.8867	4.8186
																					200	223	B	148.662	46.8926	5.11366
																					200	224	B	144.671	32.9238	5.63077
																					200	225	B	148.662	41.9062	5.24746
																					200	226	B	152.653	38.9121	5.22018
																					200	227	B	152.653	49.8867	4.93732
																					200	228	B	154.649	34.9219	5.27509
																					200	229	B	147.664	44.8965	5.19317
																					200	230	B	155.646	40.9082	5.08764
																					200	231	B	151.655	46.8926	5.03654
																					200	232	B	148.662	48.8887	5.06199
																					200	233	B	152.653	50.8848	4.91311
																					200	234	B	144.671	40.9062	5.38857
																					200	235	B	145.669	39.9102	5.38857
																					200	236	B	146.667	46.8945	5.16634
																					200	237	B	143.673	45.8945	5.27514
																					200	238	B	162.63	42.9023	4.86539
																					200	239	B	157.642	49.8867	4.8186
																					200	240	B	149.66	45.8945	5.11366
																					200	241	B	146.667	31.9277	5.5993
																					200	242	B	156.644	38.9102	5.11366
																					200	243	B	138.685	28.9375	5.96584
																					200	244	B	154.649	34.918	5.2752
																					200	245	B	153.651	33.9219	5.33122
																					200	246	B	148.662	34.918	5.44716
																					200	247	B	153.651	43.9023	5.06189
																					200	248	B	156.644	39.9062	5.08774
																					200	249	B	165.624	40.9062	4.84188
																					200	250	B	151.655	39.9102	5.22012
																					200	251	B	149.66	41.9023	5.22023
																					200	252	B	154.649	40.9062	5.11366
																					200	253	B	175.601	44.8984	4.53515
																					200	254	B	156.644	36.9141	5.16639
																					200	255	B	149.66	42.9023	5.19312
																					200	256	B	141.678	47.8906	5.27509
																					200	257	B	132.698	47.8906	5.53741
																					200	258	B	151.655	42.9023	5.13984
																					200	259	B	148.662	43.8984	5.19312
																						AVG		147.522	38.1873	5.41046
																						SD		11.3694	6.72379	0.381868
																						SEM		0.706461	0.417796	0.0237281

## Sheet: Statistics SR
		Time to stabilize			Dmax
	Bird	T1	T2		T1	T2
	1	194	27		0.0182	0.0939
	2	172	17		0.012	0.107
	3	139	24		0.0206	0.0641
	4	146	21		0.0465	0.0542
	5	151	15		0.0139	0.11
	6	162	28		0.0143	0.0403
	avg	160.667	22		0.0209167	0.07825
	sd	20.0964	5.2915		0.012919	0.0293202
	se	8.20433	2.16025		0.00527418	0.0119699

## Sheet: Statistics Duration
		Time to stabilize			Dmax
	Bird	T1	T2		T1	T2
	1	184	3		0.0160871
	2	197	1		0.00396124
	3	98	3		0.00769746
	4	165	10		0.0259016
	5	94	7		0.0378676
	6	182	5		0.00231593
	avg	153.333	4.83333		0.0156385	#DIV/0!
	sd	45.5792	3.25064		0.0139755	#DIV/0!
	se	18.6076	1.32707		0.00570548	#DIV/0!

## Sheet: Statistics PD
		Time to stabilize			Dmax
	Bird	T1	T2		T1	T2
	1	39	11		0.0554967	0.13805
	2	117	16		0.0189558	0.115252
	3	65	4		0.0215697
	4	84	18		0.10479	0.157124
	5	119	8		0.019108
	6	65	7		0.118333
	avg	81.5	10.6667		0.0563755	0.136809
	sd	31.697	5.42832		0.0451309	0.0209636
	se	12.9402	2.2161		0.0184246	0.0121033
