# Supplementary material for: Accelerated redevelopment of vocal skills is preceded by lasting reorganization of the song motor circuitry
Source: eLife journal article supplement (doi:10.7554/elife.43194), 2019-05-17
Supplement: supp [file elife-43194-supp-v1.zip › elife_poa_e43194_Figure_3_source_data_1.xlsx]

## Sheet: frequency modulation
day	B010_raw	B041_raw	B002_raw	B022_raw	B047_raw	B068_raw		MEAN	SD	SEM
0
1
2	0.45783	0.524721	0.59872	-0.0238609	0.934267	0.248144		0.456637	0.324747	0.132577
3	0.310472	0.748313	0.606872	0	0.742124	0.197128		0.434152	0.310915	0.126931
4	0.257939	0.965779	0.549235	0.0206755	0.54998	0.136969		0.41343	0.345555	0.141072
5	0.322226	0.92996	0.527049	0.0579904	0.359233	0		0.366076	0.33905	0.138417
6	0.466539	0.897636	0.334125	0.0828063	0.292776	0.0841836		0.359678	0.302821	0.123626
7	0.352659	0.926026	0.225213	0.121587	0.553345	0.162879		0.390285	0.305347	0.124657
8	0.194874	0.749454	0.0620632	0.128785	0.431293	0.279345		0.307636	0.251517	0.102681
9	0.0809635	0.782454	0.221264	0.135984	0.145794	0.41226		0.296453	0.26463	0.108035
10	0.1818	0.71225	0.282915	0.131813	0.20513	0.466052		0.329993	0.220761	0.0901251
11	0.19058	0.596363	0.202547	0.130569	0.256007	0.448065		0.304022	0.179872	0.0734323
12	0.268173	0.642816	0.391924	0.159133	0.345018	0.323833		0.355149	0.161972	0.066125
13	0.26958	0.693238	0.195962	0.20802	0.222364	0.609699		0.366477	0.223728	0.0913367
14	0.319089	0.609641	0	0.22946	0.178015	0.560744		0.316158	0.233461	0.0953099
15	0.421343	0.789816	0.293125	0.270998	0.173313	0.634998		0.430599	0.237263	0.0968623
16	0.316625	0.776544	0.213388	0.282868	0.260915	0.709253		0.426599	0.248201	0.101327
17	0.211907	0.829444	0.50733	0.327247	0.269729	0.811694		0.492892	0.272508	0.111251
18	0.264161	0.90242	0.463518	0.339551	0.390584	0.833666		0.532317	0.268952	0.109799
19	0.405231	0.485997	0.399518	0.374771	0.372928	0.878806		0.486209	0.196701	0.0803028
20	0.338115	0.485893	0.577592	0.410108	0.342776	0.883512		0.506333	0.205945	0.0840767
21	0.332718	0.818861	0.512014	0.458019	0.219533	0.891719		0.538811	0.266319	0.108724
22	0.423745	0.662112	0.53356	0.516397	0.282807	0.906113		0.554122	0.213549	0.0871809
23	0.53759	0.60722	0.430697	0.529018	0.265785	0.888612		0.543154	0.206522	0.0843122
24	0.528389	0.62359	0.341024	0.563132	0.248763	0.890209		0.532518	0.225556	0.092083
25	0.484779	0.781055	0.36075	0.61094	0.446847	0.891721		0.596015	0.205854	0.0840395
26	0.50181	0.798525	0.486221	0.701807	0.00159145	0.901723		0.56528	0.320706	0.130927
27	0.569255	0.81147	0.535347	0.643701	0.436692	0.884224		0.646781	0.170925	0.0697797
28	0.498306	0.833717	0.664199	0.585594	0.301265	0.887594		0.628446	0.217436	0.0887679
29	0.540392	0.831135	0.547507	0.515867	0.179494	0.877406		0.581967	0.252444	0.10306
30	0.559836	0.848321	0.593179	0.446139	0.0577252	0.954071		0.576545	0.317214	0.129502
31	0.582195	0.783434	0.465989	0.376411	0.151933	0.907346		0.544551	0.275207	0.112353
32	0.581852	0.566255	0.530801	0.306683	0.161589	0.916675		0.510642	0.259565	0.105967
33	0.596078	0.430746	0.486957	0.236955	0.241573	0.952778		0.490848	0.266338	0.108732
34	0.629567	0.330503	0.573755	0.167227	0.284464	0.91905		0.484095	0.276491	0.112877
35	0.545909	0.575494	0.653195	0.209904	0.280705	0.885322		0.525088	0.248282	0.101361
36	0.462252	0.545256	0.750301	0.214966	0.227382	0.851594		0.508625	0.262625	0.107216
37	0.547737	0.46225	0.628475	0.226944	0.0888448	0.817866		0.462019	0.266909	0.108965
38	0.629351	0.379243	0.634251	0.294513	0	0.784138		0.453583	0.286136	0.116815
39	0.579201	0.771862	0.605768	0.352382	0.299172	0.75041		0.559799	0.197353	0.080569
40	0.586857	0.461256	0.577284	0.36575	0.274142	0.716682		0.496995	0.161833	0.0660681
41	0.585638	0.419422	0.548801	0.426956	0.249112	0.80136		0.505215	0.187159	0.0764075
42	0.559901	0.445945	0.64822	0.516595	0.337874	0.778574		0.547851	0.15421	0.0629561
43	0.536353	0.61547	0.749295	0.58691	0.45161	0.776464		0.619351	0.12463	0.0508799
44	0.506612	0.686496	0.771356	0.623847	0.462247	0.78301		0.638928	0.133799	0.0546232
45	0.49547	0.62953	0.748265	0.664628	0.484817	0.789642		0.635392	0.126232	0.0515342
46	0.511977	0.609761	0.724191	0.689346	0.409136	0.776218		0.620105	0.138785	0.0566587
47	0.524689	0.667403	0.762249	0.736444	0.538299	0.831044		0.676688	0.124144	0.0506816
48	0.538066	0.701001	0.800307	0.723757	0.554702	0.809554		0.687898	0.117545	0.0479876
49	0.545187	0.807997	0.849266	0.710984	0.504021	0.801624		0.70318	0.146086	0.0596395
50	0.537841	0.625976	0.776661	0.74891	0.176779	0.798422		0.610765	0.234825	0.0958668
51	0.550449	0.495683	0.761971	0.815254	0.224514	0.810137		0.609668	0.232591	0.0949548
52	0.570282	0.397211	0.693109	0.808157	0.345183	0.855126		0.611511	0.211297	0.0862614
53	0.519174	0.201831	0.708746	0.812307	0.376663	0.835501		0.575704	0.254468	0.103886
54	0.572158	0.160056	0.76294	0.811551	0.380616	0.87102		0.593057	0.27818	0.113567
55	0.535149	0.165029	0.817134	0.823586	0.469139	0.882434		0.615412	0.277853	0.113433
56	0.588079	0.472689	0.851197	0.854437	0.635658	0.830403		0.705411	0.162405	0.0663016
57	0.556564	0.496067	0.766752	0.846339	0.749965	0.778372		0.69901	0.139044	0.0567645
58	0.575329	0.486012	0.738761	0.855977	0.715694	0.726341		0.683019	0.131435	0.0536579
59	0.519944	0	0.7343	0.895129	0.73992	0.751479		0.606795	0.32056	0.130868
60	0.572184	0.110994	0.774467	0.919271	0.748469	0.822397		0.657964	0.291073	0.11883
61	0.544856	0.25102	0.869413	0.907976	0.771521	0.848271		0.698843	0.254833	0.104035
62	0.537261	0.430158	0.784723	0.92252	0.662658	0.825823		0.693857	0.186006	0.0759366
63	0.515632	0.37627	0.852356	0.91719	0.713635	0.893409		0.711415	0.221805	0.0905515
64	0.513023	0.338182	0.839087	0.91186	0.691383	0.855615		0.691525	0.225372	0.0920076
65	0.537572	0.470216	0.83836	0.906531	0.711446	0.870818		0.722491	0.182897	0.0746674
66	0.535378	0.210852	0.848584	0.901201	0.732799	0.875175		0.683998	0.268012	0.109415
67	0.560725	0.15827	0.875638	0.895872	0.873595	0.869935		0.705672	0.296952	0.12123
68	0.548969	0.275887	0.87269	0.890542	0.906256	0.904743		0.733181	0.263312	0.107497
69	0.564196	0.270046	0.86137	0.885213	0.904949	0.840604		0.721063	0.25407	0.103724
70	0.579423	0.312468	0.78729	0.879883	0.971087	0.858665		0.731469	0.243893	0.0995688
71	0.522119	0.168287	0.676924	0.874553	0.947458	0.875859		0.677533	0.294786	0.120346
72	0.154797	0.374202	0.739746	0.869224	0.909369	0.879386		0.654454	0.315333	0.128734
73	0.181622	0.0675767	0.659596	0.863894	0.556183	0.908036		0.539484	0.348293	0.14219
74	0.208446	0.205028	0.849472	0.858565	0.631337	0.875559		0.604734	0.320995	0.131046
75	0.235271	0.34248	0.920939	0.853235	0.475979	0.898079		0.620997	0.305961	0.124908
76	0.262095	0.242499	0.924608	0.847906	0.370342	0.841065		0.581419	0.321744	0.131352
77	0.28892	0.678984	0.928277	0.842576	0.514139	0.873207		0.687684	0.247185	0.100913
78	0.315745	0.867813	0.96009	0.853281	0.555704	0.87948		0.738685	0.249404	0.101819
79	0.169044	0.65019	0.912812	0.892721	0.597268	0.870922		0.682159	0.284494	0.116144
80	0.0497023	0.727046	0.839517	0.897864	0.749084	0.819292		0.680417	0.315142	0.128656
81	0.0428985	0.815532	0.746267	0.910089	0.92394	0.857985		0.716119	0.336142	0.137229
82	0.0360948	0.841076	0.7534	0.892938	0.95854	0.843572		0.720937	0.342221	0.139711
83	0	0.732803	0.782962	0.901474	0.934903	0.741016		0.682193	0.344531	0.140654
84	0.0795293	0.63515	0.775831	0.887105	0.917705	0.712277		0.667933	0.307026	0.125343
85	0.0426998	0.640694	0.795702	0.891543	0.739841	0.819255		0.654956	0.311462	0.127154
86	0.161592	0.676286	0.848567	0.922709	0.27086	0.801956		0.613662	0.319984	0.130633
87	0.20628	0.64855	0.887979	0.91836	0.668818	0.779681		0.684945	0.258992	0.105733
88	0.215707	0.770701	0.870646	0.930808	0.774519	0.716321		0.713117	0.255624	0.104358
89	0.163787	0.694973	0.854393	0.91185	0.798404	0.65968		0.680515	0.270295	0.110348
90	0.203079	0.715399	0.830614	0.915283	0.580551	0.763644		0.668095	0.254081	0.103728
91	0.127519	0.502051	0.854751	0.922951	0.821917	0.803495		0.672114	0.303803	0.124027
92	0.134179	0.437184	0.892659	0.916521	0.935717	0.820278		0.689423	0.329419	0.134485
93	0.115968	0.814198	0.912253	0.897617	0.978385	0.733443		0.741977	0.318208	0.129908
94	0.0740301	0.631513	0.89354	0.920218	0.953609	0.661523		0.689072	0.330927	0.1351
95	0.0953646	0.871664	0.931899	0.929214	0.927068	0.699366		0.74243	0.32928	0.134428
96	0.172978	0.833491	0.945659	0.936305	0.954486	0.681836		0.754126	0.303076	0.12373
97	0.109326	0.86285	0.956594	0.940951	0.960558	0.71413		0.757402	0.330949	0.135109
98	0.107774	0.71694	0.951672	0.952318	0.957443	0.773484		0.743272	0.328166	0.133973
99	0.0950041	0.781471	0.941558	0.901022	0.967947	0.715689		0.733782	0.327601	0.133743
100	0.115153	0.706497	0.959964	0.89719	0.989358	0.725628		0.732298	0.324555	0.132499
101	0.106326	0.642618	0.970125	0.913414	0.989068	0.748761		0.728385	0.333274	0.136059
102	0.0671424	0.873864	0.96381	0.937177	0.945957	0.766402		0.759059	0.346572	0.141488
103	0.169916	0.850556	0.97238	0.940885	0.921305	0.819139		0.77903	0.303831	0.124039
104	0.256633	0.866486	0.968539	0.927186	0.823053	0.900671		0.790428	0.26622	0.108684
105	0.140599	0.920503	0.959072	0.930552	0.972621	0.759736		0.780514	0.322744	0.13176
106	0.231889	0.948438	0.976001	0.958969	0.927308	0.728064		0.795111	0.29061	0.118641
107	0.0878338	0.948434	0.937723	0.96154	0.810577	0.772959		0.753178	0.335251	0.136866
108	0.152988	0.810539	0.96666	0.96451	0.97195	0.812046		0.779782	0.316491	0.129207
109	0.162884	0.864217	0.949349	0.968342	0.936367	0.86591		0.791178	0.310856	0.126907
110	0.138349	0.883295	0.967985	0.966634	0.946822	0.972469		0.812592	0.331981	0.135531
111	0.155285	0.709803	0.967027	0.96993	0.993245	0.809814		0.767517	0.319899	0.130598
112	0.23373	0.67654	0.954161	0.9824	0.971232	0.899458		0.786253	0.293604	0.119863
113	0.339743	0.672888	0.969053	0.966863	0.997042	0.89442		0.806668	0.257639	0.105181
114	0.409128	0.803715	0.978355	0.965016	0.957079	0.871001		0.830716	0.217205	0.0886734
115	0.413266	0.830704	0.985217	0.970848	0.977191	0.890587		0.844635	0.21984	0.0897495
116	0.480397	0.812352	0.995725	0.976888	0.983336	0.915989		0.860781	0.198391	0.0809929
117	0.570533	0.714843	0.983656	0.969016	0.978585	0.950764		0.861233	0.175686	0.0717236
118	0.576333	0.79505	0.987557	0.967649	0.910058	0.933949		0.861766	0.155242	0.0633772
119	0.589884	0.760075	0.985249	0.984833	0.699659	0.889627		0.818221	0.161451	0.0659121
120	0.553838	0.893032	0.948025	0.984122	0.977506	0.861822		0.869724	0.162003	0.0661374
121	0.640038	0.890007	0.965663	0.987088	0.881718	0.804286		0.861467	0.126619	0.0516922
122	0.620671	0.873706	0.979962	0.985851	0.785929	0.890548		0.856111	0.137131	0.0559836
123	0.661379	0.701402	0.96351	0.986851	0.690141	0.92627		0.821592	0.152185	0.0621293
124	0.554397	0.685949	0.97522	0.983974	0.594353	0.880597		0.779082	0.191853	0.0783237
125	0.560642	0.711956	0.972655	0.972539	0.933881	0.909049		0.843454	0.16918	0.0690675
126	0.611951	0.662414	0.924294	0.973082	0.996437	0.865005		0.838864	0.163371	0.0666958
127	0.528286	0.786101	0.926747	0.982702	0.99017	0.943101		0.859518	0.178244	0.0727678
128	0.508294	0.874596	0.934838	0.979305	0.991275	0.925068		0.868896	0.181514	0.0741028
129	0.608233	0.974876	0.962249	0.974788	0.959186	0.924533		0.900644	0.144433	0.0589646
130	0.661781	0.982867	0.973028	0.979721	0.941435	0.907697		0.907755	0.12387	0.0505698
131	0.661559	0.925921	0.948574	0.972489	0.865151	0.890998		0.877449	0.112592	0.0459653
132	0.69833	0.955546	0.979172	0.976891	0.950006	0.888194		0.908023	0.10788	0.0440418
133	0.678634	0.968793	0.954026	0.98098	0.950007	0.897931		0.905062	0.11451	0.0467487
134	0.765305	0.855388	0.921756	0.977019	0.915881	0.948806		0.897359	0.0763291	0.0311612
135	0.733896	0.958788	0.946871	0.97928	0.90872	0.946497		0.912342	0.0903911	0.036902
136	0.870847	0.973065	0.925113	0.98105	0.86545	0.954077		0.928267	0.0504224	0.0205849
137	0.838496	0.955421	0.937265	0.984059	0.822179	0.94564		0.913843	0.0667803	0.0272629
138	0.835304	0.964556	0.90863	0.982532	0.778909	0.957019		0.904491	0.0812799	0.0331824
139	0.79044	0.853828	0.905555	0.984615	0.735639	0.952305		0.870397	0.0957269	0.0390803
140	0.846889	0.894756	0.918597	0.988221	0.692368	0.965119		0.884325	0.106634	0.0435332
141	0.834252	0.867056	0.898298	0.984638	0.866533	0.912481		0.893876	0.0522024	0.0213115
142	0.847377	0.950074	0.926042	0.982074	0.999458	0.915243		0.936711	0.0542747	0.0221575
143	0.786068	0.978623	0.883154	0.990854	0.990376	0.884295		0.918895	0.0824291	0.0336515
144	0.853569	0.995792	0.903161	0.983913	0.9364	0.883356		0.926032	0.0564259	0.0230358
145	0.816492	0.983289	0.936687	0.98763	1	0.882416		0.934419	0.0723002	0.0295164
146	0.774246	0.979561	0.947564	0.984271	0.99477	0.90241		0.93047	0.0835759	0.0341197
147	0.811095	0.960104	0.983987	0.989413	0.988647	0.904017		0.939544	0.0707915	0.0289005
148	0.795126	0.935575	0.974287	0.983491	0.971466	0.931958		0.931984	0.0703481	0.0287195
149	0.806573	0.883985	0.959986	0.985363	0.986107	0.913559		0.922595	0.0698644	0.028522
150	0.839213	0.928955	0.995169	0.988634	0.898858	0.883394		0.92237	0.0611899	0.0249807
151	0.811288	0.950878	0.966337	0.992914	0.904308	0.939301		0.927504	0.0640566	0.026151
152	0.809751	0.959084	0.976491	0.996287	0.909758	0.929122		0.930082	0.0667405	0.0272467
153	0.793672	0.964355	0.950411	0.992703	0.915208	0.908578		0.920821	0.0696938	0.0284524
154	0.810907	0.94491	0.950919	0.993248	0.920658	0.924897		0.924257	0.0612514	0.0250058
155	0.755103	0.840984	0.983351	0.993054	0.926108	0.945142		0.90729	0.0921792	0.037632
156	0.8683	0.902311	0.985118	0.985895	0.934386	0.977509		0.942253	0.0492167	0.0200926
157	0.851263	0.972622	0.988578	0.982343	0.942665	0.907993		0.940911	0.053137	0.0216931
158	0.854776	0.923363	0.985907	0.988576	0.950943	0.97388		0.946241	0.0510704	0.0208494
159	0.887512	0.97108	0.996792	0.990961	0.97135	0.915131		0.955471	0.0440645	0.0179892
160	0.933822	0.892473	0.989053	0.995068		0.950682		0.95222	0.0421399	0.0188455
161	0.928748	0.882673	0.995389	0.998848		0.956657		0.952463	0.0485923	0.0217312
162	0.932359	0.824378	0.995745	0.99764		0.953128		0.94065	0.0707583	0.0316441
163	0.956173	0.919226	0.971969	0.99786		0.966752		0.962396	0.0285949	0.012788
164	0.907272	0.871449	0.983675	0.99646		0.987024		0.949176	0.0562491	0.0251554
165	0.91586	0.964141	0.997418	0.995199		0.99371		0.973266	0.0348608	0.0155902
166	0.879444	0.91437	1	0.995586		0.999786		0.957837	0.0570026	0.0254924
167	0.959262	0.902067	0.988981	0.995934		0.996516		0.968552	0.0401737	0.0179662
168	0.940026	0.906117	0.984049	0.999003		0.990872		0.964013	0.039606	0.0177124
169	0.958955	0.942635	0.983504	0.998588		1		0.976736	0.0252168	0.0112773
170	0.94796	0.986127	0.963222	0.998723		0.999265		0.979059	0.0227094	0.010156
171	0.923742	0.970572	0.938995	1		0.994311		0.965524	0.0335123	0.0149872
172	0.929975	0.972892	0.969806	0.999584		0.981202		0.970692	0.025538	0.0114209
173	0.897819	0.988444	0.952665	0.999673		0.984046		0.964529	0.0411671	0.0184105
174	0.974922	0.993121	0.967283	0.99777		0.976563		0.981932	0.0129286	0.00578184
175	0.890298	0.970605	0.967741	0.986945		0.969081		0.956934	0.0380535	0.0170181
176	0.951027	0.984619	0.970738	0.967318		0.961599		0.96706	0.0123368	0.00551717
177	0.965798	0.955723	0.898509	0.94769		0.954117		0.944367	0.0264448	0.0118265
178	0.885328	0.956245	0.998718	0.928062		0.946634		0.942997	0.0413592	0.0184964
179	0.920231	0.932814	0.962299	0.908434				0.930944	0.0231525	0.0115763
180	0.911666	0.992518	0.99999	0.92312				0.956824	0.0458717	0.0229359
181	0.913689	0.995315	0.991985	0.937806				0.959699	0.0404441	0.0202221
182	0.893539	0.997656	0.995361	0.952492				0.959762	0.0487909	0.0243955
183	0.870876	0.996556	0.999756	0.967177				0.958591	0.0602872	0.0301436
184	0.847942	0.992473	0.991666	0.981863				0.953486	0.0705277	0.0352639
185	0.917573	0.983016	0.983575	0.971998				0.964041	0.0314336	0.0157168
186	0.876541	0.901053	0.975484	0.978006				0.932771	0.0517636	0.0258818
187	0.832581	0.904908	0.967394	0.979967				0.921213	0.0675925	0.0337963
188
189
190
191
192
193
194
195
196
197
198
199
200
201
202
203
204
205
206
207
208
209
210
211
212
213
214
215
216
217
218
219
220
221
222
223
224
225
226
227
228
229
230
231
232
233
234
235
236
237
238
239
240
241
242
243
244
245
246
247
248
249
250
251
252
253
254
255
256
257
258
259
260
261
262
263
264
265
266
267
268
269
270
271
272
273
274
275
276
277
278
279
280
281
282
283
284
285
286
287
288
289	0.0550537	0.803754	0.813224	0.669569	0.593209	0.848082		0.630482	0.298262	0.121765
290	0.201536	0.9024	0.929687	0.758183	0.752732	0.861256		0.734299	0.271035	0.110649
291	0.348019	0.966433	0.907183	0.783095	0.912255	0.910531		0.804586	0.231712	0.0945961
292	0.327091	0.995404	0.945792	0.808007	0.856667	0.936335		0.811549	0.246634	0.100688
293	0.512587	0.968841	0.88927	0.879848	0.964286	0.942004		0.859473	0.174007	0.0710379
294	0.605035	0.984848	0.925644	0.885331	0.97285	0.90099		0.879116	0.139834	0.057087
295	0.74339	0.984941	0.944132	0.890813	0.983325	0.931618		0.913037	0.0902184	0.0368315
296	0.881746	0.974051	0.939955	0.930708	0.989504	0.958665		0.945772	0.0380488	0.0155334
297	0.907519	0.9566	0.947056	0.928617	0.9723	0.927247		0.93989	0.0233058	0.00951455
298	0.902619	0.944771	0.964369	0.928879	0.972374	0.905553		0.936427	0.0293111	0.0119662
299	0.900185	0.908976	0.954175	0.942315	0.972608	0.896943		0.9292	0.0315323	0.012873
300	0.907908	0.896793	0.95829	0.981155	0.988376	0.96057		0.948849	0.0379962	0.0155119
301	0.9253	0.874275	0.951444	0.978362	0.986854	0.928217		0.940742	0.0411568	0.0168022
302	0.957793	0.846482	0.942867	0.978278	0.986303	0.956638		0.944727	0.0506407	0.020674
303	0.936668	0.902716	0.950621	0.974365	0.982914	0.899876		0.941193	0.0350373	0.0143039
304	0.950284	0.917346	0.942546	0.97808	0.98224	0.853043		0.937257	0.0476993	0.0194732
305	0.972024	0.908479	0.928972	0.977724	0.971916	0.76873		0.921307	0.079774	0.0325676
306	0.984823	0.941084	0.947614	0.98599	0.972524	0.890859		0.953816	0.0360853	0.0147318
307	0.952519	0.927744	0.89143	0.975305	0.984597	0.882589		0.935697	0.0426293	0.0174033
308	0.886661	0.895526	0.907072	0.981124	0.940358	0.8859		0.916107	0.0376832	0.0153841
309	0.967862	0.912717	0.927178	0.977681	0.901694	0.898959		0.931015	0.0339773	0.0138712
310	0.854185	0.91598	0.880397	0.981459	0.885515	0.930282		0.90797	0.0449887	0.0183665
311	0.844318	0.897573	0.871133	0.985155	0.867104	0.90223		0.894585	0.0491981	0.020085
312	0.835137	0.892953	0.84871	0.990379		0.954833		0.904403	0.0670178	0.0299713
313	0.882512	0.899921	0.844866	0.984121		0.906245		0.903533	0.0509863	0.0228018
314	0.894363	0.899685	0.847946	0.994856		0.966797		0.920729	0.0592715	0.026507

## Sheet: bandwidth
day	B010_raw	B041_raw	B002_raw	B022_raw	B047_raw	B068_raw		MEAN	SD	SEM
0
1
2	0.493168	0.935781	0.849929	0.256177	0.737363	0.382433		0.609142	0.272229	0.111137
3	0.551037	0.908032	0.90943	0.413935	0.803928	0.443843		0.671701	0.229248	0.0935902
4	0.535731	0.911526	0.908543	0.452967	0.870492	0.50982		0.69818	0.219754	0.0897142
5	0.623966	0.924791	0.891719	0.437865	0.877276	0.556329		0.718658	0.205797	0.0840165
6	0.625436	0.936317	0.85572	0.388528	0.871063	0.467925		0.690832	0.230341	0.0940365
7	0.68871	0.925083	0.831846	0.290356	0.802954	0.561963		0.683485	0.229782	0.093808
8	0.534657	0.883738	0.840893	0.305902	0.84678	0.64961		0.67693	0.226783	0.0925837
9	0.61904	0.880553	0.875955	0.321448	0.756486	0.726975		0.696743	0.208456	0.0851019
10	0.627444	0.873937	0.889651	0.257939	0.737898	0.825252		0.70202	0.238329	0.0972974
11	0.681407	0.849245	0.859593	0.340882	0.810662	0.771977		0.718961	0.196125	0.0800677
12	0.561464	0.845483	0.904831	0.408958	0.481575	0.623098		0.637568	0.198623	0.0810875
13	0.423376	0.807637	0.803102	0.447404	0.152875	0.628216		0.543768	0.253215	0.103375
14	0.39442	0.875298	0.701374	0.464064	0.292114	0.0758833		0.467192	0.286521	0.116972
15	0.27378	0.871194	0.705956	0.412167	0.406593	0.0379417		0.451272	0.299021	0.122075
16	0.345325	0.861316	0.859433	0.408403	0.17776	0		0.44204	0.353762	0.144423
17	0.41687	0.791638	0.783402	0.444906	0.244579	0.112688		0.465681	0.276947	0.113063
18	0.310932	0.561957	0	0.39115	0.124785	0.111173		0.25	0.209	0.0853239
19	0.207907	0.649251	0.677521	0.442099	0.218114	0.127378		0.387045	0.238417	0.0973335
20	0.211223	0.713651	0.743873	0.374812	0.240068	0.374807		0.443072	0.231507	0.0945125
21	0.192386	0.856304	0.789274	0.316083	0.614154	0.172838		0.490173	0.302843	0.123635
22	0.119711	0.852712	0.787558	0.291034	0.731809	0.280328		0.510525	0.315185	0.128674
23	0.0749144	0.686895	0.782397	0.307504	0.703908	0.387472		0.490515	0.277896	0.113451
24	0.171036	0.616903	0.886723	0.274384	0.676006	0.502108		0.521193	0.264813	0.108109
25	0.13568	0.691867	0.820275	0.228271	0.830995	0.623334		0.55507	0.300841	0.122818
26	0.243159	0.674839	0.80362	0.285632	0.807966	0.522071		0.556214	0.249417	0.101824
27	0.201492	0.37396	0.783409	0.279637	0.894024	0.497113		0.504939	0.278923	0.11387
28	0.231041	0.591548	0.814066	0.273642	0.484875	0.452489		0.47461	0.214109	0.0874097
29	0.170249	0.670923	0.803659	0.360705	0.352785	0.380626		0.456491	0.234148	0.0955906
30	0.207192	0.414466	0.734351	0.447769	0.22432	0.496174		0.420712	0.19442	0.0793717
31	0.113318	0.53977	0.774657	0.534833	0.192141	0.383747		0.423078	0.245171	0.100091
32	0.16869	0.597867	0.74727	0.621896	0.256498	0.296068		0.448048	0.236657	0.0966149
33	0.177804	0.673991	0.637582	0.70896	0.370292	0.219744		0.464729	0.238571	0.097396
34	0.158525	0.510505	0.625903	0.796023	0.381712	0.269812		0.45708	0.234999	0.0959379
35	0.293862	0.628592	0.732782	0.74141	0.390392	0.319881		0.51782	0.206904	0.0844683
36	0.429198	0.752897	0.705921	0.721493	0.554958	0.36995		0.58907	0.162951	0.0665245
37	0.222876	0.458983	0.691033	0.492733	0.51876	0.420019		0.467401	0.15192	0.0620212
38	0.334189	0.165068	0.613669	0.130617	0.479236	0.470088		0.365478	0.190676	0.077843
39	0.214025	0.46722	0.657431	0	0.440167	0.520157		0.383167	0.236528	0.096562
40	0.204898	0.554593	0.701193	0.0331148	0.332092	0.570226		0.399353	0.253326	0.10342
41	0.194438	0.709592	0.744954	0.0398505	0.224016	0.697497		0.435058	0.315881	0.128958
42	0.169093	0.694638	0.642294	0.264005	0.30627	0.679114		0.459236	0.237894	0.0971198
43	0.126256	0.743538	0.647152	0.0817998	0.356049	0.597608		0.425401	0.280143	0.114368
44	0.047554	0.711198	0.622394	0.0825647	0.278886	0.470877		0.368912	0.277554	0.113311
45	0.0674457	0.579548	0.65961	0.10825	0.36453	0.369866		0.358208	0.239596	0.0978148
46	0.0938203	0.25157	0.753679	0.140311	0.446647	0.417662		0.350615	0.243376	0.0993579
47	0.147356	0.371168	0.818975	0.238976	0.8832	0.305722		0.460899	0.311848	0.127312
48	0.167163	0.697672	0.88427	0.311812	0.775838	0.345467		0.53037	0.292358	0.119355
49	0.0669225	0.678167	0.761509	0.469842	0.717295	0.361836		0.509262	0.266228	0.108687
50	0.127034	0.647526	0.786475	0.604562	0.51922	0.34121		0.504338	0.236364	0.0964952
51	0.137416	0.499765	0.702639	0.585462	0.4193	0.452047		0.466105	0.190658	0.0778357
52	0.0592155	0.13914	0.757732	0.584781	0.324001	0.381085		0.374326	0.263999	0.107777
53	0.0836503	0.115474	0.782938	0.696185	0.205772	0.437191		0.386868	0.301155	0.122946
54	0.0607066	0.254587	0.797946	0.751563	0	0.459544		0.387391	0.340827	0.139142
55	0.0691876	0.139064	0.812954	0.761627	0.164988	0.510902		0.409787	0.330389	0.134881
56	0	0.445099	0.727609	0.867116	0.285021	0.432315		0.459527	0.31002	0.126565
57	0.0431361	0.483827	0.864615	0.83447	0.919501	0.353727		0.583213	0.349179	0.142552
58	0.100063	0.430887	0.731689	0.830205	0.921138	0.27514		0.548187	0.329068	0.134341
59	0.0301796	0.0623887	0.730964	0.830918	0.895559	0.359735		0.484957	0.387265	0.1581
60	0.0548858	0.0258144	0.818596	0.818103	0.923387	0.479359		0.520024	0.400736	0.1636
61	0.105408	0	0.779565	0.781665	0.758085	0.407028		0.471959	0.356014	0.145342
62	0.111481	0.263196	0.816921	0.782251	0.410007	0.494932		0.479798	0.280287	0.114427
63	0.138249	0.368852	0.879366	0.792359	0.486003	0.397963		0.510465	0.278354	0.113638
64	0.223169	0.328933	0.858115	0.802467	0.40298	0.431775		0.507907	0.260509	0.106352
65	0.20999	0.415264	0.826944	0.812574	0.572427	0.547921		0.564187	0.236095	0.0963853
66	0.199857	0.0235984	0.816557	0.822682	0.263336	0.449571		0.429267	0.331636	0.13539
67	0.236615	0.110885	0.835695	0.83279	0.345977	0.562574		0.487423	0.306891	0.125288
68	0.199444	0.160016	0.841972	0.842898	0.305143	0.555707		0.484197	0.309845	0.126494
69	0.335482	0.270747	0.870639	0.853006	0.195518	0.43224		0.492939	0.296179	0.120915
70	0.471519	0.400461	0.82363	0.863113	0.739053	0.473379		0.628526	0.203002	0.0828751
71	0.241841	0.229495	0.849024	0.873221	0.869636	0.53665		0.599978	0.309493	0.12635
72	0.544152	0.398079	0.911482	0.883329	0.752545	0.688893		0.696413	0.198286	0.0809499
73	0.554186	0.130143	0.833053	0.893437	0.856754	0.659333		0.654484	0.288068	0.117603
74	0.564219	0.262932	0.824795	0.903544	0.819204	0.753982		0.688113	0.2378	0.0970815
75	0.574253	0.395721	0.871667	0.913652	0.78608	0.739413		0.713464	0.195648	0.0798728
76	0.584287	0.243484	0.868623	0.92376	0.762882	0.596583		0.66327	0.247731	0.101136
77	0.594321	0.816129	0.865578	0.933868	0.749906	0.651143		0.768491	0.129225	0.0527561
78	0.604355	0.947931	0.803079	0.953449	0.758849	0.634297		0.78366	0.149175	0.0609004
79	0.554349	0.929569	0.773316	0.946614	0.767792	0.72764		0.783213	0.144168	0.0588565
80	0.607399	0.925098	0.66157	0.927755	0.755329	0.6647		0.756975	0.139588	0.0569864
81	0.556598	0.878373	0.727274	0.905017	0.807828	0.699415		0.762417	0.129158	0.0527284
82	0.505796	0.792384	0.805877	0.894858	0.759358	0.758228		0.75275	0.13088	0.0534316
83	0.435537	0.721636	0.826807	0.905785	0.776408	0.674163		0.723389	0.162517	0.0663475
84	0.565631	0.722808	0.864513	0.87013	0.845981	0.742794		0.768643	0.11786	0.048116
85	0.600473	0.703868	0.816938	0.899768	0.908205	0.805832		0.789181	0.118603	0.0484193
86	0.707403	0.680724	0.849649	0.901182	0.682583	0.82315		0.774115	0.0957145	0.0390753
87	0.772906	0.822587	0.794414	0.913579	0.742336	0.850794		0.816103	0.0608688	0.0248496
88	0.779815	0.850025	0.854654	0.920206	0.774132	0.904479		0.847218	0.0609162	0.024869
89	0.758378	0.788602	0.80381	0.912762	0.782782	0.826798		0.812189	0.0542502	0.0221475
90	0.735714	0.770791	0.83652	0.865183	0.8016	0.812388		0.803699	0.0461352	0.0188346
91	0.60858	0.766306	0.860567	0.841095	0.749886	0.912874		0.789885	0.107492	0.0438833
92	0.582219	0.755134	0.844674	0.854905	0.940343	0.750858		0.788022	0.123046	0.0502335
93	0.554502	0.780847	0.859211	0.896744	0.8177	0.849821		0.793138	0.1233	0.0503369
94	0.494673	0.727906	0.839592	0.874042	0.796007	0.835039		0.76121	0.139777	0.0570636
95	0.46197	0.86166	0.841561	0.855216	0.844833	0.743135		0.768062	0.156183	0.0637615
96	0.487804	0.829769	0.860862	0.870302	0.919606	0.81111		0.796575	0.155793	0.0636022
97	0.420334	0.727401	0.829415	0.881011	0.886621	0.88793		0.772118	0.182984	0.0747029
98	0.477318	0.764791	0.848545	0.874739	0.850444	0.956822		0.795443	0.167523	0.0683909
99	0.355183	0.839483	0.82858	0.946548	0.904199	0.864327		0.78972	0.21729	0.0887084
100	0.437389	0.776128	0.837583	0.95497	0.972996	0.844797		0.803977	0.194589	0.0794406
101	0.338848	0.71174	0.758909	0.922985	0.985309	0.805397		0.753865	0.227536	0.0928911
102	0.306039	0.668533	0.810829	0.920605	0.96567	0.870409		0.757014	0.243828	0.0995425
103	0.386637	0.667416	0.851493	0.906443	0.773172	0.882215		0.744563	0.195687	0.079889
104	0.598728	0.777508	0.782956	0.895694	0.720001	0.932161		0.784508	0.12074	0.049292
105	0.513321	0.853991	0.749019	0.929879	0.93941	0.926169		0.818631	0.166035	0.0677836
106	0.52504	0.831185	0.77761	0.943163	0.848991	0.887349		0.802223	0.146678	0.0598812
107	0.437399	0.902139	0.820391	0.927642	0.858491	0.912864		0.809821	0.186655	0.0762018
108	0.553663	0.914531	0.849991	0.915722	0.92911	0.967577		0.855099	0.152464	0.062243
109	0.630157	0.880512	0.804426	0.942958	0.919152	0.969231		0.85774	0.125395	0.0511921
110	0.615768	0.901396	0.859904	0.928218	0.964309	0.978475		0.874678	0.133896	0.0546628
111	0.554468	0.840164	0.881629	0.944431	0.96509	0.926418		0.852033	0.152587	0.0622934
112	0.645136	0.912198	0.86221	0.949087	0.945312	0.903358		0.86955	0.114406	0.046706
113	0.769219	0.871909	0.816043	0.970671	0.968408	0.954305		0.891759	0.0862057	0.0351933
114	0.790987	0.827421	0.853758	0.953164	0.914657	0.917916		0.876317	0.0621075	0.0253553
115	0.747808	0.792437	0.847858	0.95192	0.898378	0.899197		0.856266	0.0757286	0.0309161
116	0.756511	0.802997	0.872843	0.953421	0.930185	0.981352		0.882885	0.0887261	0.0362223
117	0.827385	0.868862	0.930686	0.959113	0.987466	0.973368		0.92448	0.0634287	0.0258947
118	0.863304	0.844384	0.91103	0.980786	0.947211	0.966443		0.91886	0.0558517	0.0228014
119	0.867163	0.838319	0.904248	0.966123	0.745293	0.889794		0.86849	0.0739651	0.0301961
120	0.886467	0.805512	0.925374	0.985783	0.834007	0.934963		0.895351	0.0671737	0.0274235
121	0.892388	0.843696	0.915629	0.978405	0.833092	0.843958		0.884528	0.0562153	0.0229498
122	0.909741	0.873582	0.873066	0.972377	0.832176	0.934934		0.899313	0.0501483	0.020473
123	0.924125	0.840362	0.883418	0.983385	0.831261	0.935735		0.899714	0.0589379	0.0240613
124	0.894123	0.897658	0.894398	0.979561	0.830345	0.928926		0.904169	0.0489604	0.019988
125	0.913404	0.803951	0.881147	0.977159	0.921138	0.957839		0.909106	0.061658	0.0251718
126	0.862995	0.828607	0.931638	0.960475	0.975221	0.911788		0.911787	0.0567241	0.0231575
127	0.853396	0.75397	0.921623	0.951115	0.9736	0.92854		0.89704	0.0809395	0.0330434
128	0.887631	0.820691	0.915911	0.968871	0.980633	0.889775		0.910585	0.058946	0.0240646
129	0.866826	0.897229	0.919581	0.973263	0.952672	0.922681		0.922042	0.0380335	0.0155271
130	0.910591	0.896395	0.91262	0.978244	0.892358	0.889961		0.913361	0.0331498	0.0135334
131	0.869751	0.879489	0.871424	0.986832	0.93923	0.923997		0.911787	0.046847	0.0191252
132	0.922932	0.916238	0.955592	0.985629	0.990175	0.916833		0.9479	0.0342369	0.0139771
133	0.912019	0.86615	0.942169	0.992592	0.948768	0.90541		0.927851	0.0433477	0.0176966
134	0.967015	0.904978	0.939487	0.991128	0.947001	0.936448		0.947676	0.0292531	0.0119425
135	0.954525	0.893195	0.948475	0.994662	0.688752	0.912946		0.898759	0.108733	0.04439
136	0.979385	0.894128	0.916833	0.992547	0.705535	0.940669		0.90485	0.104417	0.042628
137	0.959197	0.869495	0.926033	0.996414	0.722318	0.914048		0.897918	0.0960734	0.0392218
138	0.953288	0.840144	0.919997	0.994889	0.739101	0.94551		0.898822	0.093571	0.0382002
139	0.952955	0.919583	0.952003	0.991248	0.755884	0.970545		0.923703	0.0855492	0.0349253
140	0.95959	0.835153	0.937271	0.989463	0.772667	0.98031		0.912409	0.0881909	0.0360038
141	0.958052	0.809528	0.952257	0.992009	0.951256	0.964405		0.937918	0.0646533	0.0263946
142	0.954193	0.933194	0.931894	0.983408	0.986723	0.953838		0.957208	0.0236453	0.00965315
143	0.960778	0.955362	0.938273	0.990253	1	0.924096		0.96146	0.0292771	0.0119523
144	0.966806	0.94519	0.952858	0.981396	0.991565	0.9516		0.964902	0.0184238	0.00752148
145	0.962977	0.918763	0.947161	0.99122	0.971418	0.979103		0.961774	0.025789	0.0105283
146	0.957215	0.933569	0.949189	0.992169	0.994989	0.976387		0.967253	0.0246381	0.0100585
147	0.972397	0.934478	0.964278	0.987216	0.931481	0.988799		0.963108	0.0250952	0.0102451
148	0.975512	0.900066	0.94395	0.981248	0.998679	0.973028		0.96208	0.0351615	0.0143546
149	0.970337	0.938183	0.98531	0.977539	0.992577	0.913744		0.962948	0.0305931	0.0124896
150	0.977724	0.928858	0.969104	0.972909	0.938294	0.926514		0.952234	0.0235123	0.00959887
151	0.986657	0.975571	0.966244	0.976708	0.886178	0.977264		0.961437	0.0374341	0.0152824
152	0.976687	0.962791	0.965288	0.973587	0.834063	0.984733		0.949525	0.0571181	0.0233184
153	0.98266	0.977478	0.96356	0.97708	0.781947	0.986032		0.944793	0.0801454	0.0327192
154	0.97713	0.866833	0.972895	0.981323	0.729831	0.989259		0.919545	0.103546	0.0422724
155	0.980476	0.894914	0.988076	0.992945	0.677716	0.989334		0.920577	0.124699	0.050908
156	0.961767	0.916442	0.968976	0.986172	0.765979	0.973732		0.928845	0.0832765	0.0339975
157	0.969216	0.893507	0.974188	0.996405	0.854242	0.985381		0.94549	0.057617	0.023522
158	0.965709	0.875304	0.985525	0.99274	0.942505	0.99393		0.959286	0.0455712	0.0186043
159	0.97193	0.85538	0.97535	0.994644	0.968352	0.994628		0.960047	0.0525213	0.0214418
160	0.968051	0.870184	0.983034	0.999128		0.997929		0.963665	0.0537699	0.0240466
161	0.957142	0.907986	0.971229	0.998696		0.99701		0.966412	0.0370852	0.016585
162	0.941741	0.933797	0.980788	0.994547		0.995739		0.969322	0.0295313	0.0132068
163	0.948055	0.97161	0.983805	0.996541		0.977176		0.975437	0.0179084	0.00800889
164	0.969694	0.951443	0.992483	0.997513		0.975132		0.977253	0.0185081	0.00827707
165	0.973765	0.965391	0.994595	0.998647		0.996403		0.98576	0.0151341	0.00676819
166	0.975728	0.891272	0.992891	0.998004		0.995536		0.970687	0.0452461	0.0202347
167	0.962888	0.954921	0.992259	0.995721		0.992662		0.97969	0.0192295	0.00859968
168	0.974442	0.823356	0.96357	0.995994		0.99246		0.949964	0.0720045	0.0322014
169	0.962623	0.94746	0.924779	0.998903		0.992893		0.965332	0.031056	0.0138887
170	0.976603	0.767438	0.938562	0.998418		0.994661		0.935137	0.0966976	0.0432445
171	0.976735	0.905688	0.899373	0.999227		1		0.956205	0.0499307	0.0223297
172	0.967826	0.916681	0.89015	1		0.983728		0.951677	0.0464581	0.0207767
173	0.972733	0.939475	0.929396	0.999316		0.997924		0.967769	0.0324122	0.0144952
174	0.961283	0.959308	0.966442	0.999613		0.992296		0.975788	0.0187715	0.00839486
175	0.94397	0.946232	0.981652	0.993271		0.986668		0.970359	0.023436	0.0104809
176	0.961352	0.902705	0.996087	0.965066		0.98104		0.96125	0.0355222	0.015886
177	0.957738	0.980524	0.991979	0.936862		0.975411		0.968503	0.021566	0.00964462
178	0.95195	0.992773	0.998423	0.908657		0.969783		0.964317	0.0362414	0.0162077
179	0.966793	0.989856	0.978921	0.880453				0.954006	0.049932	0.024966
180	0.966553	0.978204	0.996518	0.878998				0.955068	0.0521917	0.0260958
181	0.9649	0.924092	0.998082	0.877544				0.941154	0.0520963	0.0260482
182	0.968449	0.970017	1	0.876089				0.953639	0.0536993	0.0268497
183	0.97626	0.976313	0.995511	0.874635				0.95568	0.0547845	0.0273923
184	0.977481	0.980176	0.989121	0.873181				0.95499	0.0547658	0.0273829
185	0.98202	0.974636	0.982732	0.860541				0.949982	0.0597398	0.0298699
186	0.975164	0.893171	0.976342	0.897097				0.935443	0.0465753	0.0232876
187	0.989426	0.91639	0.969952	0.901314				0.944271	0.0421153	0.0210577
188	0.990969	0.939608	0.963563	0.853868				0.937002	0.0592622	0.0296311
189
190
191
192
193
194
195
196
197
198
199
200
201
202
203
204
205
206
207
208
209
210
211
212
213
214
215
216
217
218
219
220
221
222
223
224
225
226
227
228
229
230
231
232
233
234
235
236
237
238
239
240
241
242
243
244
245
246
247
248
249
250
251
252
253
254
255
256
257
258
259
260
261
262
263
264
265
266
267
268
269
270
271
272
273
274
275
276
277
278
279
280
281
282
283
284
285
286
287
288
289	0.885973	0.743773	0.973298	0.612887	1.00612	0.943378		0.860904	0.152566	0.0622847
290	0.865831	0.829164	0.939531	0.849261	0.991174	0.983811		0.909795	0.0708287	0.0289157
291	0.84569	0.907601	0.910956	0.863305	0.976231	0.977389		0.913529	0.0550925	0.0224914
292	0.798978	0.957535	0.878672	0.87735	0.964546	0.976186		0.908878	0.0692551	0.0282733
293	0.891763	0.949833	0.836037	0.969655	0.939777	0.989982		0.929508	0.056478	0.0230571
294	0.965569	0.920395	0.814785	0.973118	0.934118	0.974821		0.930468	0.0608533	0.0248433
295	0.918396	0.898347	0.794415	0.976582	0.918665	0.981918		0.91472	0.0679896	0.0277567
296	0.871223	0.897917	0.771823	0.976536	0.930998	0.981216		0.904952	0.07814	0.0319005
297	0.905477	0.919265	0.756172	0.966223	0.896864	0.954455		0.899743	0.0754294	0.0307939
298	0.892144	0.91328	0.751254	0.979387	0.848428	0.925706		0.885033	0.0782842	0.0319594
299	0.820302	0.90078	0.714134	0.984141	0.886001	0.982639		0.881333	0.102872	0.0419971
300	0.92532	0.912146	0.710351	0.97141	0.933545	0.977061		0.904972	0.0987627	0.0403197
301	0.930783	0.773466	0.636733	0.965634	0.896212	0.969499		0.862055	0.131743	0.0537838
302	0.945147	0.839989	0.61973	0.964045	0.871409	0.968334		0.868109	0.132422	0.0540609
303	0.931645	0.741577	0.663381	0.972559	0.894519	0.960873		0.860759	0.127945	0.0522333
304	0.92597	0.866443	0.703055	0.965106	0.89851	0.949334		0.884736	0.0957754	0.0391002
305	0.974459	0.774541	0.679214	0.963168	0.865816	0.865123		0.85372	0.112743	0.046027
306	0.971782	0.849697	0.734404	0.853341	0.890946	0.956108		0.876047	0.086104	0.0351518
307	0.984826	0.812913	0.613192	0.956895	0.883751	0.968633		0.870035	0.141324	0.0576954
308	0.986026	0.803231	0.586297	0.946803	0.886765	0.972241		0.863561	0.15152	0.0618579
309	0.970453	0.735635	0.592649	0.974525	0.924758	0.987058		0.86418	0.162783	0.066456
310	0.975903	0.804651	0.6648	0.969879	0.877818	0.989958		0.880501	0.12756	0.0520762
311	0.971965	0.726949	0.640994	0.962858	0.90089	0.98792		0.865263	0.146049	0.0596243
312	0.952808	0.728387	0.583822	0.971849		0.991528		0.845679	0.180965	0.0809302
313	0.981839	0.679152	0.586537	0.97697		0.973897		0.839679	0.191652	0.0857095
314	0.981144	0.783064	0.596952	0.973251		0.966601		0.860203	0.168804	0.0754913
315	0.963536	0.673612	0.7111	0.977242				0.831372	0.161348	0.0806738

## Sheet: amplitude modulation
day	B010_raw	B041_raw	B002_raw	B022_raw	B047_raw	B068_raw		MEAN	SD	SEM
0
1
2	0.065736	0.0918513	0.389369	0.0143365	0.901328	-0.212209		0.208402	0.390233	0.159312
3	0.0376827	0.520019	0.533096	0	0.765869	0.179787		0.339409	0.311037	0.12698
4	0.12797	0.46861	0.556446	0.00573534	0.630411	0.426274		0.369241	0.247681	0.101115
5	0.0709648	0.802183	0.600677	0.0241887	0.413388	0.449404		0.393468	0.301292	0.123002
6	0.00220653	0.931711	0.398595	0.0318267	0.387157	0.430424		0.363654	0.337542	0.137801
7	0	0.816294	0.375587	0.018472	0.629774	0.335784		0.362652	0.324965	0.132666
8	0.00777306	0.930853	0.293705	0.027441	0.464399	0.50366		0.371305	0.345166	0.140913
9	0.0286531	0.858815	0.32573	0.03641	0.209548	0.579261		0.339736	0.326417	0.133259
10	0.0510235	0.758641	0.30366	0.0438217	0.25813	0.706952		0.353705	0.312423	0.127546
11	0.0332964	0.72838	0.18704	0.043388	0.413615	0.712602		0.353054	0.316073	0.129036
12	0.0403765	0.781847	0.243696	0.0561267	0.669687	0.740637		0.422062	0.347465	0.141852
13	0.101751	0.789129	0.121848	0.0638272	0.199655	0.59285		0.31151	0.303678	0.123976
14	0.0789766	0.748342	0	0.056656	0.132753	0.716417		0.288857	0.346326	0.141387
15	0.0645872	0.796581	0.0991206	0.0830978	0.101009	0.74153		0.314321	0.35291	0.144075
16	0.0389964	0.774479	0.0391902	0.069479	0.0873141	0.766642		0.296017	0.368052	0.150256
17	0.0134056	0.846891	0.167223	0.107515	0.156304	0.859574		0.358485	0.38708	0.158025
18	0.0222421	0.85967	0.218163	0.10119	0.171328	0.908919		0.380252	0.396308	0.161792
19	0.0635175	0.906434	0.269817	0.126298	0.226447	0.918564		0.418513	0.389494	0.15901
20	0.11278	0.916925	0.278754	0.140373	0.287476	0.895894		0.4387	0.369161	0.150709
21	0.138037	0.840427	0.264722	0.19071	0.210967	0.884077		0.42149	0.344092	0.140475
22	0.170596	0.812389	0.235536	0.266032	0.312805	0.918656		0.452669	0.324854	0.132621
23	0.257671	0.639358	0.101178	0.210337	0.25826	0.913191		0.396666	0.311835	0.127306
24	0.205051	0.611111	0.143655	0.235235	0.203715	0.879871		0.379773	0.297248	0.121351
25	0.169008	0.656755	0.173459	0.277658	0.319848	0.899709		0.416073	0.296699	0.121127
26	0.180712	0.763827	0.320447	0.375006	0.00731128	0.893804		0.423518	0.341215	0.1393
27	0.344684	0.746452	0.309043	0.26997	0.489416	0.852812		0.502063	0.24446	0.0998002
28	0.323499	0.598226	0.402825	0.164935	0.256163	0.881873		0.43792	0.262554	0.107187
29	0.253309	0.657859	0.432214	0.142676	0.170982	0.930011		0.431175	0.310739	0.126859
30	0.229104	0.743601	0.464004	0.120418	0.0809569	0.91529		0.425562	0.344361	0.140585
31	0.219975	0.736612	0.463096	0.0981589	0.0845069	0.930774		0.422187	0.351883	0.143656
32	0.213528	0.548323	0.465417	0.0759002	0.176277	0.882558		0.393667	0.299588	0.122306
33	0.22139	0.33033	0.341837	0.0536415	0.267028	0.686449		0.316779	0.208941	0.0853
34	0.233898	0.293138	0.437389	0.0313828	0.184809	0.588385		0.294834	0.195817	0.0799421
35	0.227672	0.261902	0.507347	0.0276835	0.181996	0.49032		0.28282	0.185585	0.0757646
36	0.221445	0.315673	0.569845	0.0335013	0.314055	0.392256		0.307796	0.1781	0.0727091
37	0.381656	0.285888	0.484573	0.0365357	0.0634271	0.294192		0.257712	0.176419	0.0720228
38	0.401624	0.256103	0.512001	0.0378952	0	0.196128		0.233959	0.200259	0.0817553
39	0.384923	0.898495	0.446838	0.0407645	0.182562	0.0980641		0.341941	0.315654	0.128865
40	0.394826	0.451525	0.381675	0.0314447	0.108943	0		0.228069	0.203078	0.0829062
41	0.441362	0.466744	0.316513	0.0399559	0.0353232	0.429875		0.288296	0.200889	0.0820126
42	0.376171	0.499346	0.514425	0.0640955	0.0478472	0.795928		0.382969	0.288234	0.117671
43	0.371905	0.431519	0.544594	0.139437	0.140677	0.888566		0.41945	0.280805	0.114638
44	0.533694	0.470007	0.629597	0.143461	0.0984042	0.811636		0.4478	0.278567	0.113724
45	0.559255	0.596642	0.655487	0.163733	0.176634	0.788193		0.489991	0.259662	0.106007
46	0.581879	0.59722	0.626997	0.204383	0.378847	0.827847		0.536196	0.216321	0.0883127
47	0.559397	0.666439	0.694859	0.259828	0.841158	0.786206		0.634648	0.208041	0.0849323
48	0.453729	0.804144	0.76272	0.30381	0.809897	0.853907		0.664701	0.228335	0.0932174
49	0.484614	0.640865	0.759355	0.353302	0.656677	0.862387		0.6262	0.183945	0.0750951
50	0.455621	0.595141	0.666319	0.398562	0.440336	0.890788		0.574461	0.185463	0.0757148
51	0.453369	0.629487	0.669966	0.515506	0.254803	0.928785		0.575319	0.227161	0.092738
52	0.383219	0.845326	0.650939	0.578645	0.421813	0.957303		0.639541	0.228151	0.0931423
53	0.425061	0.710185	0.608523	0.628672	0.240998	0.976259		0.598283	0.250629	0.102319
54	0.31795	0.774992	0.643672	0.578256	0.398498	0.965229		0.6131	0.238964	0.0975568
55	0.37367	0.805873	0.678821	0.620492	0.461918	0.960473		0.650208	0.216391	0.0883411
56	0.309321	0.742525	0.657871	0.679539	0.545543	0.914398		0.641533	0.202951	0.0828543
57	0.550427	0.665258	0.70594	0.671626	0.899539	0.868323		0.726852	0.132847	0.0542345
58	0.541366	0.703886	0.67118	0.705224	0.858589	0.822247		0.717082	0.113474	0.0463256
59	0.526127	0.696992	0.654657	0.740991	0.75892	0.79989		0.696263	0.0973064	0.0397252
60	0.495788	0.716386	0.697787	0.784459	0.696501	0.863157		0.709013	0.122682	0.0500846
61	0.517819	0.750766	0.694334	0.731258	0.759245	0.897336		0.725126	0.122833	0.0501464
62	0.514548	0.742172	0.609617	0.721064	0.635139	0.915882		0.689737	0.137814	0.0562624
63	0.602993	0.812715	0.639326	0.718708	0.689972	0.928726		0.732074	0.120325	0.0491224
64	0.628639	0.700146	0.672411	0.716353	0.557821	0.930264		0.700939	0.125978	0.0514302
65	0.553415	0.691621	0.672656	0.713998	0.720114	0.900727		0.708755	0.112015	0.04573
66	0.607148	0.907654	0.647944	0.711642	0.659968	0.86109		0.732574	0.123104	0.050257
67	0.600895	0.857967	0.684897	0.709287	0.738379	0.892354		0.747296	0.109673	0.0447738
68	0.628282	0.789482	0.640652	0.706931	0.730794	0.894984		0.731854	0.0995991	0.0406612
69	0.684457	0.814115	0.637702	0.704576	0.807805	0.893554		0.757035	0.096678	0.0394686
70	0.740631	0.873722	0.67968	0.702221	0.917306	0.855353		0.794819	0.0996602	0.0406861
71	0.701636	0.877501	0.600678	0.699865	0.901054	0.880545		0.77688	0.125642	0.0512933
72	0.520563	0.760913	0.768603	0.69751	0.821354	0.876332		0.740879	0.123623	0.0504691
73	0.517214	0.662698	0.681045	0.695155	0.254408	0.876194		0.614452	0.210176	0.0858042
74	0.513865	0.549618	0.632754	0.692799	0.915674	0.90231		0.70117	0.172784	0.0705387
75	0.510517	0.436537	0.879913	0.690444	0.171988	0.869285		0.593114	0.274475	0.112054
76	0.507168	0.838105	0.740591	0.688088	0.0673387	0.76675		0.60134	0.28438	0.116098
77	0.503819	0.875618	0.601269	0.685733	0.905255	0.742185		0.71898	0.155581	0.0635158
78	0.500471	0.949039	0.846168	0.745897	0.777669	0.841903		0.776858	0.152335	0.0621906
79	0.421909	0.482416	0.912859	0.767548	0.650083	0.896305		0.68852	0.207261	0.084614
80	0.261492	0.169707	0.846478	0.801544	0.815406	0.840339		0.622494	0.316935	0.129388
81	0.238325	0.156654	0.87885	0.790415	0.65668	0.841295		0.593703	0.317042	0.129432
82	0.215158	0.750514	0.824436	0.810861	0.763421	0.818916		0.697217	0.238124	0.0972136
83	0.22363	0.71265	0.795349	0.866694	0.81063	0.830597		0.706592	0.242074	0.0988265
84	0.28909	0.456181	0.718582	0.840874	0.818983	0.842261		0.660995	0.233988	0.0955252
85	0.198055	0.558262	0.813381	0.8423	0.690189	0.974098		0.679381	0.274888	0.112223
86	0.316207	0.606586	0.840731	0.880536	0.646074	0.951275		0.706902	0.234172	0.0956003
87	0.362757	0.25239	0.828275	0.865144	0.935852	0.934401		0.69647	0.306043	0.124941
88	0.309142	0.44852	0.812938	0.916259	0.91124	0.897787		0.715981	0.267486	0.109201
89	0.333467	0.222597	0.785872	0.882593	0.908927	0.853692		0.664525	0.304202	0.12419
90	0.452163	0.255794	0.806629	0.934975	0.931534	0.890008		0.711851	0.287817	0.117501
91	0.508963	0.332323	0.798261	0.956998	0.90866	0.895913		0.73352	0.253994	0.103693
92	0.570792	0.379584	0.781559	0.94544	0.923602	0.845803		0.74113	0.222423	0.0908038
93	0.571022	0.4874	0.812612	0.916408	0.890467	0.846461		0.754062	0.179744	0.0733803
94	0.654693	0.4455	0.876332	0.955645	0.887111	0.792793		0.768679	0.188993	0.0771559
95	0.677375	0.529114	0.884195	0.971318	0.832881	0.813729		0.784769	0.157945	0.0644806
96	0.693008	0.433318	0.834167	0.917719	0.758543	0.874424		0.751863	0.17566	0.071713
97	0.706143	0.573065	0.884025	0.935786	0.773325	0.933798		0.801024	0.144509	0.0589955
98	0.655025	0.525327	0.845783	0.939334	0.813028	0.864594		0.773849	0.153761	0.0627725
99	0.659665	0.60702	0.812901	0.865323	0.788468	0.929815		0.777199	0.122666	0.050078
100	0.673046	0.510472	0.849264	0.852674	0.830071	0.879262		0.765798	0.14513	0.0592491
101	0.665619	0.536319	0.872675	0.863062	0.806827	0.91638		0.776814	0.146431	0.0597802
102	0.638893	0.610239	0.828035	0.898779	0.922536	0.950953		0.808239	0.148258	0.0605262
103	0.600773	0.556553	0.868661	0.919122	0.874601	0.91601		0.789287	0.165044	0.0673788
104	0.726783	0.62678	0.880398	0.921832	0.76466	0.967345		0.814633	0.130109	0.0531166
105	0.683022	0.807038	0.867524	0.927498	0.965228	0.881265		0.855263	0.100129	0.0408776
106	0.697573	0.843696	0.874218	0.969486	0.872113	0.923995		0.863514	0.0927422	0.0378618
107	0.599554	0.801659	0.847994	0.982033	0.687477	0.92687		0.807598	0.144244	0.0588874
108	0.645582	0.826646	0.90942	0.973763	0.8401	0.966339		0.860309	0.121799	0.0497243
109	0.668693	0.687505	0.868317	0.97975	0.889403	0.952199		0.840978	0.132632	0.0541469
110	0.651779	0.689756	0.897468	0.978006	0.895077	0.94557		0.842942	0.137459	0.0561174
111	0.651085	0.652173	0.894944	0.989787	0.960873	0.913731		0.843766	0.152568	0.0622854
112	0.6745	0.582268	0.879584	0.994994	0.962807	0.928907		0.837177	0.168727	0.0688826
113	0.6962	0.702591	0.903132	0.994061	0.953507	0.917813		0.861217	0.129242	0.0527629
114	0.703326	0.592272	0.920142	0.993244	0.772127	0.980745		0.826976	0.163312	0.0666717
115	0.676362	0.632926	0.944236	0.995724	0.954861	0.988649		0.86546	0.165029	0.0673727
116	0.691021	0.717471	0.971481	0.997596	0.987524	0.991479		0.892762	0.146519	0.059816
117	0.79859	0.614115	0.960332	0.997206	0.931969	0.964927		0.877857	0.14656	0.0598327
118	0.794674	0.830427	0.949299	0.992737	0.790086	0.98794		0.890861	0.0962059	0.0392759
119	0.757399	0.792351	0.977609	0.996624	0.602244	0.966447		0.848779	0.15787	0.0644502
120	0.751436	0.925238	0.965461	0.996835	0.916173	0.992811		0.924659	0.0912111	0.0372368
121	0.789213	0.792192	0.969743	0.99754	0.82722	0.96658		0.890415	0.0974196	0.0397714
122	0.726235	0.850109	0.964945	0.993709	0.738268	0.982128		0.875899	0.122556	0.0500333
123	0.744342	0.683553	0.972577	0.992109	0.649315	0.984821		0.837786	0.162262	0.0662431
124	0.696897	0.702439	0.97242	0.989535	0.560362	0.981991		0.817274	0.186846	0.0762796
125	0.704095	0.842462	0.960213	0.994162	0.959606	0.978019		0.906426	0.11276	0.0460339
126	0.769415	0.841438	0.947653	0.993609	0.967607	0.968448		0.914695	0.0888546	0.0362747
127	0.744499	0.891186	0.961727	0.996009	0.976695	0.981645		0.925294	0.0959122	0.039156
128	0.716167	0.925148	0.961843	0.996388	0.940896	0.947697		0.91469	0.100195	0.0409043
129	0.763037	0.975292	0.94253	0.988604	0.875787	0.9873		0.922092	0.0887319	0.0362247
130	0.733868	0.964633	0.862429	0.987755	0.915166	0.951187		0.902506	0.0934903	0.0381673
131	0.837506	0.785787	0.910504	0.994512	0.915822	0.976367		0.903416	0.0800065	0.0326625
132	0.768566	0.930393	0.910796	0.996758	0.973892	0.975116		0.92592	0.0833651	0.0340337
133	0.852262	0.949348	0.924574	0.998855	0.956914	0.993091		0.945841	0.0536418	0.0218992
134	0.781889	0.820899	0.93458	0.995351	0.978616	0.977498		0.914805	0.0909573	0.0371332
135	0.80801	0.942665	0.943931	0.991927	0.588005	0.897525		0.86201	0.147886	0.0603741
136	0.881352	0.863171	0.931082	0.996939	0.564295	0.954912		0.865292	0.155276	0.0633911
137	0.87973	0.756285	0.942205	0.989889	0.540585	0.953366		0.843677	0.169658	0.0692627
138	0.807363	0.840531	0.949159	0.997615	0.516875	0.982802		0.849058	0.180074	0.073515
139	0.85511	0.821787	0.903942	0.992758	0.493165	0.988277		0.842506	0.184513	0.0753273
140	0.888773	0.884062	0.952191	0.97891	0.469455	0.991361		0.860792	0.196887	0.0803788
141	0.861548	0.688007	0.947356	0.968911	0.797859	0.986319		0.875	0.116228	0.0474498
142	0.909485	0.91768	0.944685	0.989039	0.995791	0.981445		0.956354	0.0376341	0.015364
143	0.884937	0.907129	0.887494	0.971269	0.987137	0.973483		0.935241	0.0470195	0.0191956
144	0.876299	0.775194	0.914962	0.986487	0.928705	0.957644		0.906548	0.0744736	0.0304037
145	0.87064	0.821546	0.888359	0.990566	0.98303	0.941804		0.915991	0.0670253	0.027363
146	0.838972	0.953917	0.92313	0.991793	1	0.96101		0.944804	0.0587716	0.0239934
147	0.860105	0.782488	0.901614	0.997297	0.918756	0.974098		0.905726	0.0781222	0.0318933
148	0.86828	0.855472	0.90303	0.995975	0.997342	0.966343		0.931074	0.0637066	0.0260081
149	0.795805	0.783163	0.875112	0.993538	0.985457	0.975966		0.901507	0.0968878	0.0395543
150	0.799828	0.918545	0.926347	0.996576	0.981043	0.979793		0.933689	0.0728353	0.0297349
151	0.870403	0.934895	0.946599	0.991874	0.844349	0.973745		0.926978	0.058094	0.0237168
152	0.817468	0.971262	0.966238	0.999086	0.707656	0.942165		0.900646	0.113901	0.0464999
153	0.867305	0.945093	0.947291	0.997513	0.570962	0.970561		0.883121	0.158986	0.0649059
154	0.872547	0.784624	0.958882	0.996722	0.434268	0.972033		0.836513	0.212037	0.0865639
155	0.906089	0.782099	0.939977	0.99673	0.297574	0.959913		0.81373	0.263342	0.107509
156	0.921798	0.954725	0.958834	0.989459	0.490567	0.974766		0.881692	0.19295	0.0787715
157	0.961348	0.913223	0.955418	0.996008	0.683561	0.982855		0.915402	0.117059	0.0477893
158	0.967979	0.846636	0.950118	0.981674	0.876554	0.963037		0.931	0.0555136	0.0226633
159	0.948401	0.965893	0.957885	0.990131	0.867183	0.978994		0.951415	0.0438521	0.0179026
160	0.974422	0.910038	0.960306	0.993813		0.98621		0.964958	0.03321	0.014852
161	0.938765	0.810892	0.963792	0.985505		0.978411		0.935473	0.0719027	0.0321559
162	0.881171	0.626043	0.913952	0.979344		0.987939		0.87769	0.147599	0.0660082
163	0.910308	0.929859	0.834344	0.998521		0.979383		0.930483	0.064557	0.0288707
164	0.966708	0.828001	0.979418	0.999215		0.977152		0.950099	0.0692599	0.030974
165	0.960137	0.881229	0.982221	0.99977		0.994669		0.963605	0.0485213	0.0216994
166	0.947505	0.759849	0.972374	0.99912		0.98292		0.932354	0.0982391	0.0439339
167	0.918863	0.662627	0.967685	0.998513		0.997978		0.909133	0.141572	0.0633129
168	0.936431	0.908834	0.963303	0.997374		0.991166		0.959422	0.0372518	0.0166595
169	0.90587	0.959065	0.904618	0.997254		1		0.953361	0.0468122	0.0209351
170	0.934811	0.957603	0.915833	0.999627		0.994715		0.960518	0.0366232	0.0163784
171	0.957017	0.955369	0.872565	0.999716		0.988701		0.954673	0.0498359	0.0222873
172	0.968129	0.982649	0.901165	0.99998		0.971715		0.964728	0.0376315	0.0168293
173	0.946948	1	0.935527	1		0.976589		0.971813	0.0297772	0.0133168
174	0.909197	0.982834	0.90277	0.998467		0.961357		0.950925	0.043149	0.0192968
175	0.960175	0.958781	0.847471	0.983169		0.946124		0.939144	0.0529592	0.0236841
176	0.953589	0.969367	0.94938	0.983821		0.930891		0.957409	0.0201424	0.00900796
177	0.950133	0.986401	0.900202	0.984472		0.915658		0.947373	0.0391731	0.0175188
178	0.978059	0.814502	0.98373	0.985124		0.900425		0.932368	0.0748693	0.0334826
179	0.958804	0.891702	0.936459	0.985775				0.943185	0.0398061	0.0199031
180	0.974704	0.905051	1	0.985297				0.966263	0.0421055	0.0210527
181	0.96803	0.969005	0.991481	0.984819				0.978334	0.0116635	0.00583177
182	0.971535	0.968809	0.992521	0.984341				0.979301	0.0111141	0.00555704
183	0.970594	0.958693	0.997243	0.983863				0.977598	0.0166497	0.00832486
184	0.989115	0.997569	0.984552	0.983385				0.988655	0.0064364	0.0032182
185	0.982458	0.91288	0.971861	0.990365				0.964391	0.0351674	0.0175837
186	0.98594	0.8902	0.95917	0.988202				0.955878	0.0457275	0.0228638
187	0.982505	0.745545	0.946478	0.990758				0.916322	0.115463	0.0577314
188
189
190
191
192
193
194
195
196
197
198
199
200
201
202
203
204
205
206
207
208
209
210
211
212
213
214
215
216
217
218
219
220
221
222
223
224
225
226
227
228
229
230
231
232
233
234
235
236
237
238
239
240
241
242
243
244
245
246
247
248
249
250
251
252
253
254
255
256
257
258
259
260
261
262
263
264
265
266
267
268
269
270
271
272
273
274
275
276
277
278
279
280
281
282
283
284
285
286
287
288
289	0.23896	0.784913	0.554911	-0.0284947	1.03205	0.557547		0.523314	0.378091	0.154355
290	0.236893	0.922115	0.841268	0.272742	0.890101	0.739826		0.650491	0.312834	0.127714
291	0.234826	0.918962	0.848256	0.394611	0.748153	0.709012		0.642303	0.269073	0.109848
292	0.349699	0.923682	0.904086	0.51648	0.763864	0.855727		0.718923	0.234204	0.0956132
293	0.539252	0.874478	0.960433	0.747701	0.737491	0.932021		0.798563	0.157057	0.0641183
294	0.592744	0.901351	0.959809	0.793935	0.817657	0.964437		0.838322	0.13953	0.0569627
295	0.659061	0.884894	0.971158	0.840169	0.91883	0.958058		0.872028	0.114851	0.0468877
296	0.725378	0.894928	0.97666	0.864579	0.912688	0.926009		0.883374	0.0858242	0.0350376
297	0.790494	0.905525	0.959502	0.893671	0.934064	0.879577		0.893806	0.0582235	0.0237696
298	0.799015	0.904609	0.933626	0.935692	0.873215	0.856936		0.883849	0.0522122	0.0213155
299	0.78927	0.933732	0.927931	0.897739	0.754584	0.949682		0.87549	0.0826966	0.0337607
300	0.859409	0.868531	0.946846	0.935854	0.821863	0.938295		0.895133	0.0520534	0.0212507
301	0.825599	0.826168	0.965414	0.930962	0.947045	0.938126		0.905552	0.0627795	0.0256296
302	0.898755	0.91365	0.978637	0.916488	0.938242	0.968012		0.935631	0.0319822	0.0130567
303	0.891471	0.980316	0.975107	0.931017	0.948227	0.953012		0.946525	0.0324813	0.0132604
304	0.780256	0.925352	0.98896	0.902496	0.815188	0.912597		0.887475	0.0765664	0.0312581
305	0.829603	0.953383	0.983247	0.960092	0.914397	0.788448		0.904862	0.0785569	0.0320707
306	0.834456	0.96277	0.990582	0.92455	0.8495	0.934914		0.916129	0.0620521	0.0253327
307	0.802699	0.981074	0.981247	0.941229	0.853302	0.963359		0.920485	0.074858	0.0305606
308	0.759336	0.926551	0.97699	0.882336	0.769104	0.974643		0.881494	0.097346	0.0397413
309	0.820571	0.970644	0.978592	0.901836	0.754629	0.960773		0.897841	0.091954	0.0375401
310	0.827677	0.933211	0.970996	0.908244	0.883114	0.96722		0.915077	0.0545558	0.0222723
311	0.825543	0.972951	0.953014	0.908824	0.793447	0.978159		0.905323	0.0787989	0.0321695
312	0.828909	0.965809	0.947557	0.901276		0.981267		0.924964	0.0615152	0.0275105
313	0.898875	0.966108	0.967012	0.945779		0.948647		0.945284	0.0277087	0.0123917
314	0.898052	0.936383	0.951557	0.899879		0.947991		0.926772	0.0260048	0.0116297
315	0.814924	0.973117	0.977337	0.916666				0.920511	0.0756308	0.0378154

## Sheet: mean frequency
day	B010_raw	B041_raw	B002_raw	B022_raw	B047_raw	B068_raw		MEAN	SD	SEM
0
1
2	-0.15462	0.576586	0.760657	0.603779	0.897226	0.0425946		0.45437	0.416562	0.170061
3	0	0.582681	0.379822	0.806719	0.787791	0.0279318		0.430824	0.358418	0.146323
4	0.0141173	0.456717	0.201958	0.778664	0.678355	0		0.354969	0.334677	0.136631
5	0.238185	0.684676	0.130905	0.832797	0.545486	0.062052		0.415684	0.316496	0.129209
6	0.260091	0.781495	0.445421	0.818448	0.20465	0.0573718		0.427913	0.314056	0.128213
7	0.45586	0.918146	0.280243	0.817948	0.339501	0.108663		0.486727	0.317498	0.129618
8	0.571915	0.839051	0.268692	0.760752	0.318568	0.171653		0.488439	0.276243	0.112776
9	0.761959	0.750729	0.217609	0.703557	0.0931929	0.165022		0.448678	0.320801	0.130966
10	0.758123	0.615343	0.396979	0.798616	0.110153	0.197721		0.479489	0.290016	0.118398
11	0.845198	0.288203	0.596234	0.787709	0.108497	0.19797		0.470635	0.314763	0.128502
12	0.757012	0.319803	0.544024	0.925365	0.104193	0.315689		0.494347	0.307194	0.125411
13	0.682564	0.0893033	0.596947	0.763783	0.0384013	0.267809		0.406468	0.314794	0.128514
14	0.689329	0.233861	0.64987	0.497221	0.0167718	0.356577		0.407272	0.257539	0.10514
15	0.762614	0.392794	0.633171	0.400412	0.00660664	0.338094		0.422282	0.261351	0.106696
16	0.753402	0.502832	0.768368	0.229685	0.123076	0.319612		0.449496	0.271521	0.110848
17	0.744189	0.0277385	0.784034	0.214281	0.0820795	0.298707		0.358505	0.32864	0.134167
18	0.784627	0.0896632	0.79075	0.163408	0.153783	0.323613		0.384308	0.321835	0.131389
19	0.782942	0	0.582344	0.183553	0.0356956	0.317472		0.317001	0.311429	0.12714
20	0.750899	0.146298	0.424687	0.156335	0.0660955	0.307016		0.308555	0.251969	0.102866
21	0.739477	0.564094	0.394502	0.212359	0.547239	0.321635		0.463217	0.190396	0.0777287
22	0.636842	0.216769	0.365941	0.242636	0.427166	0.311283		0.366773	0.153347	0.0626035
23	0.568901	0.317501	0.421186	0.220044	0.364428	0.332742		0.3708	0.117337	0.0479027
24	0.609712	0.482004	0.368967	0.252894	0.301689	0.318611		0.38898	0.133317	0.0544265
25	0.708748	0.804862	0.442355	0.382379	0.370394	0.326401		0.505857	0.200201	0.0817318
26	0.806639	0.786755	0.32132	0.452919	0.35142	0.306993		0.504341	0.232213	0.0948004
27	0.735228	0.564275	0.24926	0.429518	0.533355	0.404464		0.486017	0.165147	0.0674211
28	0.742489	0.666538	0.268233	0.406117	0.306241	0.476701		0.47772	0.191923	0.0783524
29	0.768088	0.705208	0.247883	0.33843	0.117689	0.487642		0.444157	0.257392	0.10508
30	0.766424	0.57782	0.167612	0.270744	0.0347332	0.442056		0.376565	0.271474	0.110829
31	0.741115	0.473461	0.233181	0.203058	0.0452379	0.355633		0.341948	0.2433	0.0993268
32	0.787251	0.300209	0.32974	0.135372	0.050021	0.326634		0.321538	0.255271	0.104214
33	0.742456	0.310066	0.245553	0.0676861	0.0982168	0.348289		0.302044	0.243239	0.099302
34	0.743605	0.220878	0.248258	0	0.107638	0.345783		0.277694	0.257619	0.105172
35	0.636677	0.533387	0.173976	0.0503157	0.0996193	0.343277		0.306209	0.239933	0.0979521
36	0.529748	0.60987	0.116569	0.117005	0.0987326	0.340771		0.302116	0.227192	0.0927509
37	0.657132	0.567599	0.161152	0.214618	0.0642944	0.338265		0.333844	0.234892	0.0958941
38	0.670232	0.525327	0.153765	0.395129	0.000860662	0.335759		0.346845	0.243259	0.09931
39	0.667296	0.536859	0.184235	0.575894	0.0527177	0.333253		0.391709	0.241793	0.0987114
40	0.544297	0.7572	0.214706	0.720831	0.0263588	0.330747		0.432357	0.291136	0.118856
41	0.522067	0.607066	0.245177	0.768352	0	0.287668		0.405055	0.279247	0.114002
42	0.545583	0.488681	0.235044	0.698837	0.0962645	0.303883		0.394715	0.222215	0.0907191
43	0.647416	0.468644	0.264742	0.705523	0.143989	0.340204		0.42842	0.219926	0.0897844
44	0.647849	0.383502	0.311459	0.571961	0.327257	0.312785		0.425802	0.14698	0.0600042
45	0.692285	0.460551	0.394991	0.414603	0.311894	0.343046		0.436228	0.13599	0.0555177
46	0.684765	0.491933	0.365402	0.429378	0.422713	0.469409		0.477267	0.110558	0.0451353
47	0.715766	0.511456	0.348838	0.382491	0.663306	0.484745		0.517767	0.147209	0.0600977
48	0.715317	0.553041	0.332274	0.284087	0.435056	0.481408		0.466864	0.156141	0.0637444
49	0.701034	0.340283	0.382756	0.221719	0.341293	0.539345		0.421072	0.171154	0.0698733
50	0.6495	0.37219	0.404326	0.19484	0.312829	0.52071		0.409066	0.159254	0.0650153
51	0.701781	0.389906	0.384385	0.120726	0.296372	0.570773		0.410657	0.204271	0.0833931
52	0.624028	0.435364	0.38243	0.0861456	0.298505	0.665793		0.415378	0.214374	0.0875178
53	0.633171	0.447185	0.291217	0.121663	0.283484	0.605886		0.397101	0.200905	0.0820193
54	0.498646	0.424891	0.369622	0.156403	0.454087	0.678017		0.430277	0.170488	0.0696015
55	0.507209	0.428246	0.448026	0.186415	0.428897	0.728387		0.45453	0.173809	0.0709574
56	0.430603	0.436878	0.362914	0.177806	0.636247	0.652876		0.449554	0.177802	0.0725873
57	0.595754	0.372081	0.268555	0.203597	0.67555	0.577364		0.448817	0.193927	0.0791703
58	0.503198	0.326674	0.204137	0.145069	0.686678	0.501853		0.394601	0.205797	0.0840162
59	0.508257	0.313304	0.265802	0.187643	0.558811	0.50724		0.390176	0.153937	0.0628444
60	0.540474	0.308687	0.291203	0.242083	0.557391	0.557664		0.41625	0.15026	0.0613436
61	0.624772	0.368584	0.307494	0.334096	0.782387	0.53791		0.49254	0.188821	0.0770858
62	0.643806	0.383228	0.276766	0.281893	0.746897	0.629095		0.493614	0.204499	0.0834864
63	0.587707	0.359628	0.19459	0.279075	0.790505	0.627057		0.473094	0.230509	0.0941051
64	0.520375	0.370727	0.219453	0.276258	0.775709	0.627484		0.465001	0.214854	0.0877139
65	0.587493	0.324117	0.345977	0.27344	0.580294	0.655649		0.461162	0.164478	0.067148
66	0.540052	0.344045	0.397755	0.270623	0.656833	0.681507		0.481802	0.170029	0.0694139
67	0.575217	0.324129	0.414549	0.267805	0.794579	0.662289		0.506428	0.205266	0.0837996
68	0.615553	0.2487	0.356426	0.264988	0.782227	0.732182		0.500013	0.239127	0.0976232
69	0.64119	0.264776	0.296521	0.26217	0.691866	0.624932		0.463576	0.208659	0.0851846
70	0.666828	0.32706	0.324854	0.259353	0.733483	0.64622		0.492966	0.210677	0.0860087
71	0.653761	0.342439	0.297708	0.256535	0.662468	0.657362		0.478379	0.198504	0.0810389
72	0.346078	0.465315	0.112675	0.253718	0.538823	0.572422		0.381505	0.177807	0.0725894
73	0.330431	0.447653	0	0.2509	0.240586	0.583649		0.30887	0.199325	0.0813743
74	0.314783	0.503371	0.32006	0.248083	0.222866	0.507495		0.352776	0.124071	0.0506517
75	0.299136	0.559089	0.154706	0.245265	0.284965	0.48905		0.338702	0.153762	0.0627729
76	0.283488	0.62676	0.311168	0.242448	0.242416	0.573797		0.380013	0.173407	0.0707932
77	0.267841	0.892579	0.46763	0.23963	0.187824	0.575846		0.438558	0.267362	0.10915
78	0.252193	0.894002	0.390734	0.245784	0.36836	0.646153		0.466204	0.254969	0.104091
79	0.320473	0.739168	0.354815	0.293875	0.548896	0.670406		0.487939	0.1916	0.0782206
80	0.565663	0.84668	0.582512	0.321036	0.466487	0.657439		0.573303	0.177203	0.072343
81	0.406747	0.775686	0.459038	0.326731	0.792721	0.631075		0.565333	0.196802	0.0803441
82	0.247832	0.711783	0.461726	0.247938	0.892652	0.658964		0.536816	0.262585	0.1072
83	0.284598	0.659404	0.335438	0.222679	0.822463	0.600704		0.487548	0.240411	0.0981475
84	0.450776	0.661801	0.45922	0.252565	0.816424	0.576326		0.536185	0.194722	0.0794949
85	0.696348	0.662002	0.497454	0.259795	0.65303	0.575105		0.557289	0.1624	0.0662996
86	0.614229	0.660977	0.352685	0.286864	0.813381	0.594724		0.55381	0.197938	0.0808078
87	0.649757	0.680034	0.442212	0.344493	0.32211	0.598792		0.506233	0.157183	0.0641699
88	0.683564	0.695648	0.399502	0.412395	0.302567	0.545428		0.506517	0.161578	0.0659638
89	0.669053	0.746394	0.342186	0.409609	0.368744	0.602968		0.523159	0.171451	0.0699947
90	0.530363	0.818487	0.352209	0.467502	0.0398726	0.637469		0.474317	0.265297	0.108307
91	0.432873	0.58073	0.252214	0.550989	0.799152	0.634713		0.541778	0.185573	0.0757601
92	0.476516	0.609479	0.352398	0.564044	0.674213	0.595711		0.545393	0.114519	0.0467521
93	0.624557	0.69755	0.389078	0.545853	0.82426	0.578606		0.609984	0.146759	0.0599141
94	0.561074	0.710414	0.351691	0.542825	0.838183	0.578866		0.597176	0.16478	0.0672713
95	0.680376	0.853096	0.297204	0.528143	0.850146	0.57773		0.631116	0.211956	0.0865306
96	0.772913	0.823374	0.347274	0.542678	0.829209	0.640369		0.659303	0.189745	0.0774632
97	0.63256	0.74716	0.358678	0.557424	0.849471	0.696044		0.640223	0.170011	0.0694066
98	0.733422	0.747255	0.339215	0.590957	0.867098	0.73172		0.668278	0.183465	0.0748991
99	0.711365	0.917194	0.398108	0.543759	0.921731	0.659024		0.691863	0.206542	0.0843206
100	0.660872	0.810589	0.384944	0.573077	0.835644	0.649909		0.652506	0.16523	0.0674549
101	0.621149	0.730146	0.413107	0.657021	0.814469	0.626289		0.643697	0.134757	0.0550143
102	0.617255	0.611185	0.369163	0.656116	0.709253	0.690788		0.60896	0.123737	0.0505155
103	0.73918	0.858456	0.318119	0.648633	0.796067	0.668798		0.671542	0.189978	0.0775582
104	0.585774	0.899629	0.367767	0.623841	0.734769	0.699428		0.651868	0.176854	0.0722005
105	0.575448	0.915306	0.391766	0.604707	0.817782	0.668622		0.662272	0.185621	0.0757794
106	0.802447	0.932958	0.40242	0.706641	0.821093	0.676808		0.723728	0.181761	0.0742037
107	0.622502	0.780347	0.311449	0.66638	0.835861	0.692282		0.65147	0.183821	0.0750445
108	0.756409	0.917322	0.45088	0.822461	0.957678	0.734565		0.773219	0.180496	0.0736873
109	0.724357	0.848523	0.415408	0.761874	0.928963	0.715602		0.732454	0.175398	0.0716057
110	0.830684	0.816519	0.472974	0.782717	0.946263	0.818065		0.77787	0.159524	0.0651256
111	0.724825	0.780922	0.446131	0.634154	0.905788	0.708897		0.70012	0.153869	0.0628166
112	0.779585	0.83351	0.481227	0.663921	0.896774	0.651091		0.717685	0.150038	0.0612529
113	0.788727	0.866838	0.498459	0.610589	0.935325	0.860997		0.760156	0.16965	0.0692594
114	0.731533	0.836347	0.51941	0.627179	0.95338	0.768578		0.739405	0.153029	0.0624737
115	0.707374	0.76885	0.556267	0.672185	0.934511	0.785056		0.737374	0.126552	0.0516645
116	0.819197	0.639809	0.576643	0.772464	0.837566	0.805766		0.741908	0.107585	0.0439213
117	0.709316	0.794124	0.533972	0.679239	0.925861	0.738726		0.730206	0.1296	0.052909
118	0.644353	0.71286	0.516188	0.746804	0.856533	0.845054		0.720299	0.128305	0.0523803
119	0.607698	0.688873	0.554512	0.851239	0.888414	0.719879		0.718436	0.131559	0.0537088
120	0.71511	0.825089	0.59448	0.838901	0.431368	0.750677		0.692604	0.155375	0.0634315
121	0.612598	0.918635	0.549888	0.90148	0.542123	0.709644		0.705728	0.169346	0.069135
122	0.539436	0.845409	0.547924	0.926863	0.652878	0.71616		0.704778	0.157393	0.0642555
123	0.495445	0.81682	0.594022	0.893935	0.763633	0.725718		0.714929	0.146769	0.059918
124	0.562746	0.749286	0.586045	0.894028	0.874388	0.827088		0.74893	0.14429	0.058906
125	0.588251	0.754062	0.596791	0.912271	0.927827	0.823405		0.767101	0.149158	0.0608934
126	0.621406	0.821171	0.638113	0.964478	0.928518	0.822276		0.799327	0.143259	0.0584851
127	0.650686	0.816761	0.67543	0.977056	0.806602	0.83999		0.794421	0.119078	0.0486134
128	0.73509	0.874317	0.677469	0.97641	0.942727	0.75902		0.827506	0.121146	0.0494576
129	0.774898	0.912825	0.670369	0.976872	0.966244	0.852351		0.858926	0.119156	0.0486454
130	0.731135	0.897771	0.74127	0.970564	0.97278	0.74009		0.842268	0.117954	0.0481543
131	0.691184	0.936903	0.747722	0.977108	0.807712	0.849073		0.83495	0.109382	0.0446551
132	0.732706	0.89968	0.787572	0.973318	0.906757	0.831863		0.855316	0.0879901	0.0359218
133	0.792332	0.781915	0.818137	0.963235	0.90095	0.870177		0.854458	0.0702601	0.0286836
134	0.788453	0.928713	0.807513	0.973885	0.720982	0.887674		0.851203	0.0950713	0.0388127
135	0.848144	0.886226	0.813985	0.973356	0.641375	0.769634		0.82212	0.112382	0.0458798
136	0.659182	0.738271	0.768931	0.974332	0.666605	0.876826		0.780691	0.123658	0.0504832
137	0.760206	0.843615	0.783635	0.978092	0.691834	0.9267		0.83068	0.107308	0.0438084
138	0.749145	0.804237	0.823229	0.985759	0.717064	0.881791		0.826871	0.0968359	0.0395331
139	0.637515	0.786438	0.773699	0.974375	0.742294	0.969459		0.813963	0.133087	0.0543323
140	0.708511	0.795057	0.781054	0.978903	0.767523	0.92917		0.826703	0.104136	0.0425133
141	0.644281	0.922017	0.803944	0.977439	0.911911	0.960437		0.870005	0.126093	0.0514772
142	0.673733	0.881137	0.791729	0.981698	0.987898	0.911485		0.87128	0.120713	0.049281
143	0.651532	0.864935	0.807709	0.987861	0.994374	0.92626		0.872112	0.129717	0.0529569
144	0.649012	0.904629	0.845634	0.970165	0.975952	0.927741		0.878855	0.122271	0.0499169
145	0.69774	0.816711	0.804348	0.969262	0.979063	0.929223		0.866058	0.111342	0.0454552
146	0.638994	0.848335	0.825007	0.99619	1	0.913527		0.870342	0.134592	0.0549471
147	0.696545	0.836331	0.837731	0.984437	0.991951	0.877736		0.870789	0.109805	0.0448276
148	0.714724	0.88848	0.836516	0.981659	0.988062	0.844714		0.875693	0.102396	0.041803
149	0.747015	0.737659	0.814192	0.98877	0.99825	0.859497		0.857564	0.114447	0.0467229
150	0.732329	0.842369	0.848136	0.972409	0.906248	0.911925		0.868903	0.0821544	0.0335394
151	0.808443	0.9192	0.869199	0.981051	0.826672	0.979186		0.897292	0.0746628	0.030481
152	0.760732	0.698452	0.88558	0.980257	0.747096	0.960752		0.838811	0.119392	0.0487416
153	0.773552	0.93266	0.865923	0.979618	0.66752	0.976787		0.86601	0.124553	0.0508486
154	0.753984	0.76603	0.916664	0.987435	0.587944	0.953523		0.827597	0.152304	0.0621776
155	0.753071	0.708206	0.896815	0.993174	0.508367	0.979799		0.806572	0.186781	0.0762531
156	0.798961	0.875047	0.92378	0.986009	0.617041	0.960962		0.8603	0.13647	0.0557136
157	0.818525	0.733836	0.904042	0.980442	0.725715	0.984396		0.857826	0.116243	0.047456
158	0.832835	0.864937	0.917962	0.971045	0.834389	0.967154		0.898053	0.0630909	0.0257567
159	0.807632	0.864808	0.954656	0.962451	0.894493	0.984354		0.911399	0.0678589	0.0277033
160	0.844864	0.827875	0.944556	0.910278		0.988717		0.903258	0.0673618	0.0301251
161	0.821858	0.838374	0.920006	0.924428		0.993609		0.899655	0.0701121	0.0313551
162	0.766172	0.841646	0.92121	0.949984		0.991812		0.894165	0.09017	0.0403253
163	0.823341	0.893666	0.954811	0.987646		0.878697		0.907632	0.0647405	0.0289528
164	0.793767	0.949611	0.9499	0.997157		0.982354		0.934558	0.0813742	0.0363916
165	0.770401	0.934067	0.975915	0.988177		1		0.933712	0.0946205	0.0423156
166	0.787721	0.707461	0.98462	0.994289		0.996804		0.894179	0.136867	0.0612088
167	0.856753	0.946099	0.975753	0.999952		0.989293		0.95357	0.0577687	0.0258349
168	0.860803	0.893071	0.987524	0.998328		0.986556		0.945256	0.0635699	0.0284293
169	0.839025	0.904249	0.963752	0.999602		0.989431		0.939212	0.0671397	0.0300258
170	0.853093	0.856171	0.952938	0.999954		0.992286		0.930889	0.0718693	0.0321409
171	0.83285	0.86324	0.935206	1		0.996143		0.925488	0.0759857	0.0339818
172	0.870247	0.861646	0.919707	0.997581		0.979442		0.925725	0.0617841	0.0276307
173	0.875003	0.892117	0.899742	0.996846		0.979811		0.928704	0.0554899	0.0248158
174	0.876584	0.909515	0.933441	0.999541		0.961676		0.936152	0.0472622	0.0211363
175	0.899667	0.985794	0.940686	0.989616		0.943541		0.951861	0.037065	0.016576
176	0.90565	0.932071	0.979663	0.983435		0.925405		0.945245	0.0345616	0.0154564
177	0.90687	0.898768	0.965603	0.977253		0.90727		0.931153	0.0371514	0.0166146
178	0.886329	0.966699	0.994542	0.971072		0.889135		0.941555	0.0502714	0.022482
179	0.891886	0.910571	0.989855	0.96489				0.939301	0.045768	0.022884
180	0.931225	0.974245	1	0.944609				0.96252	0.030781	0.0153905
181	0.918709	0.959451	0.981875	0.924328				0.946091	0.0299018	0.0149509
182	0.920324	0.892306	0.997522	0.904047				0.92855	0.0473951	0.0236976
183	0.921405	0.979555	0.995869	0.883766				0.945149	0.0519232	0.0259616
184	0.850648	0.989922	0.9796	0.863484				0.920914	0.0740309	0.0370155
185	0.899997	0.977925	0.963331	0.913122				0.938594	0.0378477	0.0189238
186	0.897152	0.948287	0.947062	0.884397				0.919224	0.033265	0.0166325
187	0.942509	0.957403	0.930793	0.8978				0.932126	0.0253432	0.0126716
188	0.70506	0.96652	0.914523	0.940682				0.881696	0.119656	0.0598278
189
190
191
192
193
194
195
196
197
198
199
200
201
202
203
204
205
206
207
208
209
210
211
212
213
214
215
216
217
218
219
220
221
222
223
224
225
226
227
228
229
230
231
232
233
234
235
236
237
238
239
240
241
242
243
244
245
246
247
248
249
250
251
252
253
254
255
256
257
258
259
260
261
262
263
264
265
266
267
268
269
270
271
272
273
274
275
276
277
278
279
280
281
282
283
284
285
286
287
288
289	0.829722	0.770191	0.871825	0.776275	0.947224	0.742752		0.822998	0.0765148	0.031237
290	0.770799	0.780237	0.818851	0.752033	0.92291	0.869957		0.819131	0.0658852	0.0268975
291	0.711875	0.821893	0.891327	0.724909	0.898596	0.827523		0.812687	0.0796711	0.0325256
292	0.62971	0.817619	0.837356	0.697784	0.871114	0.864998		0.78643	0.0993275	0.0405503
293	0.65625	0.799728	0.755515	0.676839	0.900875	0.916143		0.784225	0.109529	0.0447152
294	0.602325	0.804205	0.723837	0.695835	0.932076	0.915013		0.778882	0.129415	0.0528333
295	0.717953	0.763016	0.704544	0.71483	0.943964	0.90971		0.792336	0.106653	0.043541
296	0.833581	0.828352	0.694022	0.675105	0.945128	0.859811		0.806	0.103136	0.042105
297	0.851858	0.773277	0.693505	0.620936	0.949678	0.776865		0.777686	0.115551	0.0471734
298	0.894526	0.819033	0.662668	0.548602	0.908545	0.686007		0.75323	0.143534	0.0585976
299	0.867783	0.823084	0.639182	0.578519	0.922186	0.809928		0.773447	0.13479	0.0550277
300	0.855504	0.819413	0.669328	0.498433	0.950771	0.84765		0.773517	0.162646	0.0664001
301	0.898335	0.800567	0.64218	0.483235	0.919236	0.818797		0.760392	0.167377	0.0683312
302	0.876121	0.671034	0.656322	0.514776	0.95447	0.780407		0.742188	0.160384	0.0654764
303	0.910941	0.677488	0.73328	0.586506	0.943049	0.797614		0.774813	0.137121	0.0559793
304	0.910215	0.781975	0.732762	0.622933	0.923414	0.773265		0.790761	0.112942	0.0461084
305	0.861554	0.865068	0.741699	0.495889	0.945937	0.742942		0.775515	0.158026	0.0645139
306	0.831377	0.819141	0.742504	0.692573	0.944016	0.851062		0.813446	0.0877045	0.0358052
307	0.874158	0.796289	0.64037	0.54529	0.928136	0.909394		0.782273	0.156443	0.0638676
308	0.926297	0.834328	0.649331	0.430957	0.841287	0.913124		0.765887	0.191595	0.0782182
309	0.871998	0.768472	0.655538	0.626854	0.77936	0.83855		0.756796	0.0977126	0.039891
310	0.825994	0.775995	0.654929	0.633002	0.791053	0.887597		0.761428	0.0990074	0.0404196
311	0.895544	0.893175	0.666748	0.780254	0.784424	0.875504		0.815941	0.089861	0.0366856
312	0.904053	0.900176	0.636378	0.711134		0.863109		0.80297	0.121933	0.0545299
313	0.887047	0.904809	0.622729	0.466946		0.851811		0.746669	0.193245	0.0864219
314	0.858392	0.882494	0.621924	0.4927		0.837974		0.738697	0.17249	0.0771399
315	0.932682	0.877239	0.626168	0.490962				0.731763	0.2087	0.10435

## Sheet: wiener entropy
day	B010_raw	B041_raw	B002_raw	B022_raw	B047_raw	B068_raw		MEAN	SD	SEM
0
1
2	0.226269	0.894143	0.862123	0.144952	0.764522	-0.00196782		0.481674	0.401845	0.164053
3	0.300244	0.928519	0.613556	0.135939	0.779817	0.0556396		0.468952	0.357474	0.145938
4	0.566589	0.833677	0.183591	0.184524	0.795112	0.0637876		0.43788	0.33753	0.137796
5	0.580613	0.912847	0.320255	0.0758623	0.801045	0.312086		0.500451	0.320961	0.131032
6	0.614329	0.929955	0.693388	0.0485749	0.961881	0.325126		0.595542	0.354475	0.144714
7	0.409313	0.877505	0.618347	0.0620115	0.956506	0.235379		0.52651	0.355184	0.145003
8	0.345241	0.806111	0.437799	0.03351	0.934858	0		0.426253	0.386162	0.15765
9	0.29647	0.428811	0.780769	0.00500856	0.925454	0.100253		0.422794	0.367528	0.150043
10	0.0208391	0.386367	0.764391	0.0241838	0.899357	0.31312		0.401376	0.367386	0.149985
11	0.156073	0.209537	0.750432	0	0.942658	0.429594		0.414716	0.366779	0.149737
12	0.0886514	0.315264	0.813597	0.012488	0.543356	0.494657		0.378002	0.30065	0.12274
13	0	0.466905	0.561049	0.0240689	0.524715	0.744929		0.386944	0.305039	0.124532
14	0.189915	0.199442	0.308501	0.0418281	0.53883	0.276156		0.259112	0.165247	0.0674619
15	0.365439	0.257362	0.51084	0.0365037	0.761632	0.2978		0.371596	0.245901	0.100389
16	0.227288	0.50752	0.673799	0.0431691	0.366716	0.319443		0.356323	0.219014	0.0894119
17	0.0891378	0.398516	0.893349	0.0449005	0.474353	0.33695		0.372868	0.30699	0.125328
18	0.146061	0.920685	0.960804	0.0430978	0.402963	0.320042		0.465609	0.389372	0.158961
19	0.109478	0.830463	0.934932	0.0359934	0.320785	0.37381		0.434244	0.37102	0.151468
20	0.235	0.879369	0.825447	0.0282653	0.221328	0.377244		0.427776	0.34757	0.141895
21	0.203595	0.511019	0.724545	0.0334184	0.696487	0.22003		0.398183	0.286666	0.117031
22	0.24246	0.225599	0.82954	0.0234983	0.920661	0.29243		0.422365	0.363635	0.148453
23	0.238007	0.224728	0.837476	0.0213754	0.58044	0.226509		0.354756	0.297348	0.121392
24	0.167897	0.344662	0.825439	0.0493292	0.24022	0.36548		0.332171	0.268335	0.109547
25	0.253979	0.925551	0.809499	0.0780222	0.933346	0.345546		0.557657	0.376078	0.153533
26	0.245318	0.880538	0.862553	0.0416074	0.875851	0.476789		0.563776	0.365688	0.149292
27	0.45694	0.0844244	0.872304	0.0549545	0.927013	0.502614		0.483042	0.371982	0.151861
28	0.476024	0.819936	0.841981	0.0683016	0.650948	0.515361		0.562092	0.285004	0.116353
29	0.474117	0.803563	0.932126	0.207125	0.499693	0.612833		0.588243	0.257426	0.105094
30	0.546542	0.288871	0.94827	0.345948	0.253215	0.432899		0.469291	0.257358	0.105066
31	0.476528	0.14997	0.876039	0.484771	0.0670675	0.512636		0.427835	0.290191	0.11847
32	0.419623	0.294031	0.904677	0.623594	0.301572	0.484318		0.504636	0.231263	0.0944127
33	0.359477	0.371161	0.97304	0.762416	0.302406	0.598516		0.561169	0.266561	0.108823
34	0.39163	0	0.943007	0.901239	0.14985	0.609483		0.499202	0.388222	0.158491
35	0.425962	0.656969	0.939515	0.932912	0	0.62045		0.595968	0.352124	0.143754
36	0.460294	0.646668	0.881377	0.926579	0.0297155	0.631416		0.596008	0.326692	0.133371
37	0.249167	0.350484	0.960623	0.946188	0.691072	0.642383		0.639986	0.295207	0.120518
38	0.179819	0.054299	0.940336	0.897088	0.543209	0.65335		0.544683	0.365005	0.149013
39	0.322326	0.176151	0.89689	0.86843	0.271962	0.664317		0.533346	0.316872	0.129362
40	0.248116	0.783589	0.853445	0.857081	0.138422	0.675283		0.592656	0.318198	0.129904
41	0.314371	0.733923	0.809999	0.833303	0.00488223	0.732356		0.571472	0.33611	0.137216
42	0.293153	0.769328	0.900659	0.743636	0.26133	0.706776		0.61248	0.267962	0.109395
43	0.327401	0.855657	0.910594	0.761521	0.0217293	0.660933		0.589639	0.346322	0.141385
44	0.432844	0.841793	0.868129	0.698454	0.0410447	0.692531		0.595799	0.312691	0.127656
45	0.403133	0.570207	0.971752	0.70915	0.134308	0.650296		0.573141	0.284545	0.116165
46	0.458407	0.477882	0.899865	0.668392	0.216735	0.750517		0.578633	0.243461	0.0993925
47	0.477868	0.736768	0.883599	0.683165	0.540593	0.7317		0.675615	0.146652	0.0598705
48	0.564595	0.668386	0.867332	0.729152	0.228177	0.711732		0.628229	0.219104	0.0894487
49	0.508573	0.800623	0.737905	0.879484	0.489636	0.685018		0.68354	0.157018	0.0641021
50	0.537638	0.751593	0.781281	0.836887	0.688832	0.730904		0.721189	0.102717	0.041934
51	0.576333	0.760931	0.876338	0.826029	0.429305	0.807857		0.712799	0.173153	0.0706896
52	0.527744	0.33099	0.803277	0.898101	0.243506	0.852394		0.609335	0.282149	0.115187
53	0.498974	0.551683	0.731802	0.901478	0.295524	0.838386		0.636308	0.229096	0.0935282
54	0.508842	0.537856	0.692683	0.831188	0.181856	0.799366		0.591965	0.240172	0.0980498
55	0.505984	0.334046	0.653564	0.884048	0.313591	0.831997		0.587205	0.244129	0.0996651
56	0.483802	0.841875	0.857968	0.843877	0.172711	0.776977		0.662868	0.278644	0.113756
57	0.521114	0.854552	0.768071	0.830034	0.220696	0.721957		0.652738	0.242586	0.0990355
58	0.49723	0.840409	0.883262	0.85018	0.633081	0.666938		0.728517	0.153403	0.0626264
59	0.535101	0.503275	0.797111	0.834571	0.541024	0.734561		0.657607	0.147728	0.0603096
60	0.567206	0.542916	0.792278	0.810267	0.207685	0.72443		0.607464	0.225644	0.0921188
61	0.54526	0.684539	0.892706	0.812164	0.824987	0.659249		0.736484	0.128993	0.0526611
62	0.545602	0.886769	0.860102	0.816512	0.876632	0.734858		0.786746	0.130533	0.0532898
63	0.50391	0.771061	0.82157	0.82183	0.637882	0.6807		0.706159	0.124199	0.0507038
64	0.519676	0.834912	0.755703	0.827148	0.657682	0.670232		0.710892	0.11996	0.0489737
65	0.575931	0.868726	0.748814	0.832466	0.723855	0.777658		0.754575	0.10249	0.0418414
66	0.560938	0.65062	0.725043	0.837784	0.48411	0.73493		0.665571	0.128144	0.0523146
67	0.543417	0.774248	0.825257	0.843101	0.452521	0.747365		0.697652	0.161031	0.0657406
68	0.558944	0.855964	0.873742	0.848419	0.593359	0.820853		0.758547	0.142722	0.0582659
69	0.397497	0.847041	0.701319	0.853737	0.235752	0.800383		0.639288	0.260865	0.106498
70	0.23605	0.884806	0.625165	0.859055	0.414	0.823885		0.640494	0.266908	0.108965
71	0.472919	0.79014	0.654999	0.864372	0.423997	0.802906		0.668222	0.184088	0.0751537
72	0.142534	0.722071	0.825135	0.86969	0.682421	0.788979		0.671805	0.268017	0.109418
73	0.177555	0.620918	0.733791	0.875008	0.912796	0.813747		0.688969	0.271464	0.110825
74	0.212576	0.76089	0.762939	0.880326	0.949094	0.844427		0.735042	0.265823	0.108522
75	0.247596	0.900863	0.947577	0.885643	0.816464	0.834478		0.772104	0.261238	0.10665
76	0.282617	0.689677	0.921882	0.890961	0.657986	0.837822		0.713491	0.236508	0.0965541
77	0.317638	0.858455	0.896186	0.896279	0.682207	0.838122		0.748148	0.225303	0.0919797
78	0.352659	0.718114	0.948004	0.905297	0.79984	0.904686		0.771433	0.221754	0.0905308
79	0.224632	0.573984	0.940035	0.871079	0.917472	0.898169		0.737562	0.285251	0.116453
80	0.184663	0.607679	0.824939	0.891322	0.953343	0.882551		0.724083	0.289944	0.118369
81	0.166256	0.729206	0.640174	0.882767	0.655487	0.901833		0.66262	0.267228	0.109095
82	0.147849	0.880393	0.55432	0.921227	0.474993	0.901553		0.646723	0.310418	0.126728
83	0.19317	0.884496	0.594444	0.920021	0.481493	0.922897		0.666087	0.296983	0.121243
84	0.0257088	0.889869	0.74483	0.931409	0.398	0.914575		0.650732	0.365776	0.149327
85	0.215205	0.809782	0.70434	0.943048	0.684331	0.941492		0.716366	0.269491	0.110019
86	0.328841	0.793169	0.860187	0.926144	0.841308	0.978908		0.788093	0.23428	0.0956445
87	0.425871	0.935502	0.875004	0.909398	0.754	0.954951		0.809121	0.200775	0.0819661
88	0.553309	0.913081	0.809804	0.912398	0.850599	0.934393		0.828931	0.142809	0.0583017
89	0.563511	0.926554	0.641923	0.855786	0.77652	0.957445		0.786957	0.15771	0.064385
90	0.603323	0.914285	0.412917	0.948086	0.732107	0.969417		0.763356	0.223052	0.0910606
91	0.530194	0.668606	0.300446	0.920373	0.985946	0.931156		0.722787	0.27207	0.111072
92	0.63753	0.675818	0.6422	0.946264	0.884995	0.983098		0.794984	0.160443	0.0655006
93	0.669412	0.815977	0.63222	0.949079	0.895826	0.966239		0.821459	0.142645	0.0582347
94	0.686229	0.80557	0.679891	0.960573	0.888723	0.990882		0.835311	0.134172	0.0547756
95	0.704709	0.861695	0.832494	0.942901	0.974365	0.986238		0.883734	0.107129	0.0437351
96	0.731743	0.920581	0.748531	0.983899	0.948235	0.968137		0.883521	0.113186	0.0462082
97	0.638635	0.851758	0.852861	0.984807	0.948266	0.94229		0.86977	0.12545	0.0512146
98	0.72899	0.864715	0.841319	0.95454	0.950949	0.94094		0.880242	0.0881332	0.0359802
99	0.698932	0.972347	0.531999	0.988648	0.914324	0.977569		0.847303	0.188947	0.0771375
100	0.494225	0.969274	0.792815	0.984844	0.982518	0.952826		0.86275	0.194635	0.0794594
101	0.619569	0.861425	0.803225	0.960113	0.976932	0.930556		0.858636	0.133937	0.0546794
102	0.57716	0.791802	0.706315	0.905142	0.993773	0.976061		0.825042	0.163914	0.0669177
103	0.565399	0.888791	0.684118	0.953357	0.875956	0.971469		0.823182	0.162367	0.0662861
104	0.37049	0.892445	0.726988	0.953458	0.838382	0.995413		0.796196	0.228682	0.0933591
105	0.489005	0.900928	0.654798	0.964677	0.910359	0.988989		0.818126	0.200515	0.0818598
106	0.638194	0.936177	0.657496	0.94207	0.903707	0.973616		0.841877	0.152048	0.0620732
107	0.561641	0.847896	0.956942	0.972293	0.816203	0.985895		0.856812	0.160548	0.0655435
108	0.579012	0.909783	0.843367	0.9312	0.663492	0.978991		0.817641	0.160491	0.0655203
109	0.567012	0.823783	0.88272	0.920523	0.56474	0.971069		0.788308	0.17889	0.0730317
110	0.646243	0.829367	0.740187	0.93567	0.690455	0.776431		0.769725	0.103483	0.0422468
111	0.500771	0.845837	0.841734	0.97718	0.926895	0.976616		0.844839	0.178889	0.0730311
112	0.530887	0.894957	0.716463	0.967389	0.880883	0.960915		0.825249	0.170321	0.0695334
113	0.492601	0.905882	0.749902	0.92374	0.973146	0.981486		0.837793	0.188613	0.0770008
114	0.518225	0.866886	0.743963	0.955247	0.65481	0.972022		0.785192	0.179147	0.0731366
115	0.508578	0.848343	0.772055	0.96816	0.766075	0.964099		0.804552	0.169869	0.0693487
116	0.569829	0.851708	0.933879	0.964357	0.962307	0.96641		0.874748	0.155629	0.0635351
117	0.579408	0.86442	0.9515	0.976826	0.922619	0.937901		0.872112	0.148244	0.0605204
118	0.412341	0.876012	0.963301	0.961834	0.692376	0.959046		0.810818	0.221401	0.0903865
119	0.495627	0.90651	0.93979	0.970257	0.685875	0.991379		0.831573	0.198084	0.0808673
120	0.48795	0.863471	0.933887	0.959329	0.9273	0.987171		0.859851	0.186794	0.0762584
121	0.471172	0.973793	0.917297	0.974942	0.916169	0.986166		0.873257	0.199324	0.0813735
122	0.429485	0.914441	0.916836	0.967622	0.905038	0.986225		0.853274	0.210147	0.0857922
123	0.431763	0.925377	0.949494	0.973023	0.893907	0.977399		0.858494	0.211359	0.0862869
124	0.495281	0.928052	0.937219	0.973592	0.882775	1		0.869487	0.187668	0.076615
125	0.484828	0.875326	0.963436	0.968164	0.50838	0.987886		0.798003	0.236777	0.0966639
126	0.634107	0.914918	0.910985	0.987952	0.969824	0.988985		0.901128	0.135325	0.0552461
127	0.68062	0.931311	0.895912	0.992796	0.805679	0.996249		0.883761	0.121913	0.0497709
128	0.627336	0.970704	0.905112	0.988635	0.966402	0.985973		0.90736	0.140501	0.0573592
129	0.692729	0.984736	0.878512	0.973913	0.969492	0.992716		0.91535	0.116686	0.0476368
130	0.731159	0.968785	0.786372	0.981586	0.940649	0.970702		0.896542	0.108982	0.0444918
131	0.768563	0.801947	0.894524	0.990434	0.858107	0.983745		0.882887	0.0917709	0.0374653
132	0.73071	0.975123	0.919327	0.989778	0.838455	0.989596		0.907165	0.104157	0.0425218
133	0.745754	0.903719	0.929399	0.989485	0.974336	0.99012		0.922135	0.0931505	0.0380285
134	0.742406	0.979773	0.889875	0.986522	0.898183	0.990642		0.914567	0.0956391	0.0390445
135	0.759601	0.905739	0.934079	0.991479	0.965374	0.965669		0.920324	0.084122	0.0343426
136	0.572127	0.911655	0.909566	0.993525	0.946786	0.997922		0.888597	0.15967	0.0651849
137	0.771	0.93914	0.92761	0.989498	0.928197	0.985876		0.923553	0.0797324	0.0325506
138	0.715083	0.897875	0.933099	0.99188	0.909608	0.977102		0.904108	0.0996715	0.0406907
139	0.53019	0.920856	0.917378	0.981726	0.891019	0.991718		0.872148	0.172055	0.070241
140	0.682171	0.917471	0.946661	0.917063	0.872431	0.936209		0.878668	0.099563	0.0406464
141	0.734802	0.84876	0.945518	0.875217	0.691352	0.986745		0.847066	0.115627	0.0472047
142	0.733065	0.923491	0.932174	0.903453	0.987665	0.990034		0.911647	0.0942802	0.0384897
143	0.684214	0.701547	0.913019	0.913862	0.967272	0.993137		0.862175	0.134851	0.0550528
144	0.647679	0.73684	0.913225	0.903591	0.884139	0.99106		0.846089	0.127734	0.0521473
145	0.667559	0.925658	0.934977	0.859429	0.971494	0.988983		0.89135	0.118437	0.0483518
146	0.639933	0.873925	0.949273	0.887251	0.951104	0.983474		0.880827	0.125123	0.0510812
147	0.702651	0.917203	0.974235	0.88766	1	0.977742		0.909915	0.109872	0.0448552
148	0.6911	0.947573	0.96881	0.933388	0.869778	0.97491		0.897593	0.107928	0.0440614
149	0.75106	0.968266	0.971848	0.899489	0.979001	0.966663		0.922721	0.0889869	0.0363288
150	0.734116	0.975673	0.961003	0.912103	0.864457	0.963303		0.901776	0.0920474	0.0375782
151	0.801205	0.925621	0.961479	0.966678	0.829522	0.956778		0.90688	0.0728689	0.0297486
152	0.756972	0.891093	0.901161	0.968591	0.794587	0.953171		0.877596	0.0850527	0.0347226
153	0.797557	0.919668	0.966053	0.948281	0.759652	0.912152		0.883894	0.0846928	0.0345757
154	0.788704	0.90885	0.965807	0.939945	0.724717	0.923845		0.875311	0.0959445	0.0391692
155	0.844552	0.924483	0.980238	0.972192	0.689782	0.927747		0.889832	0.109238	0.0445963
156	0.871768	0.924815	0.9807	0.961838	0.705079	0.956967		0.900194	0.102945	0.0420271
157	0.891593	0.907839	0.984809	0.952365	0.720375	0.970565		0.904591	0.0971442	0.0396589
158	0.913548	0.970776	0.938731	0.921079	0.735671	0.929534		0.901557	0.0836647	0.034156
159	0.802282	0.846758	0.867619	0.989351	0.895613	0.970391		0.895336	0.0724698	0.0295857
160	0.668153	0.900915	0.935272	0.986481		0.990849		0.896334	0.132913	0.0594405
161	0.699016	0.954469	0.946303	0.987802		0.989566		0.915431	0.122522	0.0547933
162	0.734665	0.942256	0.947519	0.946833		0.963276		0.90691	0.0966148	0.0432075
163	0.736311	0.939124	0.920888	0.981393		0.934613		0.902466	0.0955949	0.0427513
164	0.692218	0.916314	0.989355	0.968404		0.997389		0.912736	0.127256	0.0569107
165	0.56043	0.902964	0.991967	0.98731		0.99301		0.887136	0.186561	0.0834328
166	0.624894	0.861567	0.860741	0.98652		0.999313		0.866607	0.150395	0.0672588
167	0.601042	0.855824	0.903681	0.995632		0.992776		0.869791	0.161656	0.0722949
168	0.775152	0.896479	0.931467	0.99516		0.996741		0.919	0.0911028	0.0407424
169	0.782642	0.937792	0.874501	0.995723		0.991414		0.916415	0.0894755	0.0400147
170	0.786996	0.915646	0.997339	0.9981		0.997238		0.939064	0.092112	0.0411937
171	0.781873	0.892466	0.94691	1		0.9901		0.92227	0.0892323	0.0399059
172	0.83325	0.934306	0.911411	0.994129		0.947439		0.924107	0.0590924	0.0264269
173	0.899173	0.916002	0.94051	0.995292		0.988175		0.94783	0.0427622	0.0191238
174	0.862034	0.867473	0.982529	0.998334		0.961219		0.934318	0.0648833	0.0290167
175	0.884289	0.937686	0.917748	0.991119		0.934264		0.933021	0.0387517	0.0173303
176	0.91245	0.916505	1	0.973514		0.907308		0.941955	0.0420827	0.01882
177	0.876716	0.988763	0.96968	0.955909		0.880352		0.934284	0.0522284	0.0233572
178	0.888216	0.683487	0.944949	0.938304		0.853397		0.86167	0.106455	0.047608
179	0.909958	0.975031	0.920217	0.920699				0.931476	0.0294562	0.0147281
180	0.955017	0.80786	0.895485	0.923897				0.895565	0.0633226	0.0316613
181	0.951916	0.937193	0.870754	0.927095				0.921739	0.0354854	0.0177427
182	0.977823	0.991575	0.846022	0.930293				0.936428	0.0657409	0.0328705
183	0.948644	0.891773	0.821291	0.933491				0.8988	0.0569942	0.0284971
184	0.965733	0.987529	0.796559	0.936689				0.921628	0.0859404	0.0429702
185	0.962547	0.873538	0.771827	0.931001				0.884728	0.0838029	0.0419014
186	0.98974	0.979827	0.747096	0.969159				0.921455	0.116543	0.0582715
187	0.962231	0.944402	0.915332	0.965689				0.946914	0.023028	0.011514
188
189
190
191
192
193
194
195
196
197
198
199
200
201
202
203
204
205
206
207
208
209
210
211
212
213
214
215
216
217
218
219
220
221
222
223
224
225
226
227
228
229
230
231
232
233
234
235
236
237
238
239
240
241
242
243
244
245
246
247
248
249
250
251
252
253
254
255
256
257
258
259
260
261
262
263
264
265
266
267
268
269
270
271
272
273
274
275
276
277
278
279
280
281
282
283
284
285
286
287
288
289	0.954819	0.840774	0.479036	0.411974	0.960661	0.76192		0.734864	0.237074	0.0967849
290	0.875752	0.886691	0.90852	0.73464	0.95197	0.784603		0.857029	0.0813881	0.0332266
291	0.796685	0.904693	0.882204	0.70643	0.94328	0.812362		0.840942	0.0861498	0.0351705
292	0.611964	0.896098	0.969149	0.67822	0.91661	0.828595		0.816773	0.141959	0.0579545
293	0.672001	0.915212	0.938007	0.850853	0.782845	0.829648		0.831428	0.0964745	0.0393856
294	0.725797	0.877276	0.939616	0.870996	0.876455	0.874096		0.860706	0.0710423	0.0290029
295	0.794272	0.887874	0.956003	0.891139	0.921888	0.923681		0.89581	0.0556325	0.0227119
296	0.862747	0.87555	0.964145	0.894388	0.935637	0.8657		0.899695	0.0414188	0.0169092
297	0.929158	0.895828	0.898054	0.842731	0.768068	0.803074		0.856152	0.0623155	0.0254402
298	0.668376	0.929374	0.919667	0.870399	0.858814	0.786614		0.838874	0.0978874	0.0399624
299	0.947789	0.917866	0.938216	0.916611	0.86409	0.819541		0.900686	0.0491928	0.0200829
300	0.74672	0.903787	0.939705	0.934316	0.939837	0.899791		0.894026	0.0743453	0.0303513
301	0.83662	0.919718	0.954949	0.940222	0.903078	0.856506		0.901849	0.0467413	0.0190821
302	0.925369	0.987178	0.9121	0.944084	0.890523	0.853508		0.918794	0.0457503	0.0186775
303	0.562498	0.901377	0.875603	0.90498	0.891819	0.869064		0.834224	0.133861	0.0546487
304	0.79799	0.872742	0.880156	0.914509	0.893978	0.881088		0.873411	0.0397625	0.016233
305	0.76502	0.944107	0.851128	0.837381	0.888688	0.87318		0.859917	0.0594681	0.0242778
306	0.790513	0.887905	0.855433	0.896115	0.905386	0.886672		0.870337	0.0425733	0.0173805
307	0.778519	0.885367	0.922116	0.877063	0.913337	0.930103		0.884417	0.0558822	0.0228138
308	0.722603	0.833058	0.939162	0.912007	0.803535	0.939563		0.858321	0.0872662	0.0356263
309	0.347575	0.883242	0.942435	0.949026	0.701942	0.908343		0.788761	0.234397	0.0956922
310	0.763214	0.810349	0.934498	0.934471	0.738532	0.893919		0.84583	0.0867512	0.035416
311	0.420138	0.945316	0.929733	0.905398	0.692975	0.961183		0.809124	0.214609	0.0876139
312	0.505603	0.93995	0.916295	0.900031		0.920325		0.836441	0.185489	0.0829531
313	0.782245	0.972741	0.917363	0.859686		0.953622		0.897131	0.0773275	0.0345819
314	0.711299	0.879101	0.881693	0.968631		0.960772		0.880299	0.103492	0.0462832
315	0.613566	0.940602	0.808984	0.947005				0.827539	0.156188	0.0780939

## Sheet: Decay data
	Bird	SR	duration	PD	FM	AM	BW	MF	E
		decay T1 T2	decay T1 T2	decay T1 T2	decay T1 T2	decay T1 T2	decay T1 T2	decay T1 T2	decay T1 T2
	1	0.916223	0.296669	0.369466	0.698557	1.02203	0.102681	0.107065	0.0257042
	2	0.479412	0.115309	0.448067	0.0640678	0.0438919	0.1733	0.119936	0.0885221
	3	0.406583	0.0428718	-0.0285153	0.0619058	0.376412	0.00268801	0.0178983	0.0663258
	4	0.480844	-0.0400832	0.355565	0.388734	1.28408	0.18732	0.111444	0.444601
	5	0.833957	-0.0856949	0.183423	0.252119	-0.00268673	-0.0352432	-0.0468719	-0.0196108
	6	0.473054	0.0355476	0.27377	0.0740058	0.239679	0.0145069	0.132956	0.134533
	mean	0.598345	0.0607699	0.266963	0.256565	0.493901	0.0742089	0.0737379	0.123346

## Sheet: Recovery data
	Bird	SR	duration	PD	FM	AM	BW	MF	E
		recover T2 T2	recover T2 T2	recover T2 T2	recover T2 T2	recover T2 T2	recover T2 T2	recover T2 T2	recover T2 T2
	1	0.85854	0.254766	0.337846	0.625451	0.866558	0.0823216	0.0451338	-0.123889
	2	0.457747	-0.0532307	0.46307	0.0268411	0.0549189	-0.0198993	0.0740445	0.0415389
	3	0.3619	-0.0960244	-0.0672226	-0.0128679	0.448561	-0.28811	-0.143745	0.107187
	4	0.445384	0.174291	0.591115	0.411908	1.19201	0.303663	-0.198886	0.424832
	5	0.477097	-0.361858	0.10951	0.224785	-0.139357	-0.0967015	-0.0664153	-0.08996
	6	0.456455	-0.0333474	0.153256	0.0433017	0.257805	0.0127003	0.0597426	0.142861
	mean	0.50952	-0.0192338	0.264596	0.219903	0.44675	-0.00100427	-0.0383542	0.0837617

## Sheet: Stats FM
			Time to stabilize			Dmax
		Bird	T1	T2		T1	T2
		1	165	17		0.0183	0.113
		2	128	2		0.0137
		3	108	4		0.0075
		4	137	22		0.023	0.079
		5	101	14		0.014	0.071
		6	30	6		0.0488
		avg	111.5	10.8333		0.0208833	0.0876667
		sd	45.9336	8.01041		0.0146191	0.022301
		se	18.7523	3.27024		0.00596822	0.0128755

## Sheet: Stats AM
			Time to stabilize			Dmax
		Bird	T1	T2		T1	T2
		1	222	16		0.0118511	0.196776
		2	145	32		0.0175272
		3	138	11		0.0152804	0.272589
		4	131	16		0.0565407	0.321739
		5	89	7		0.0226149
		6	46	13		0.085692	0.0814336
		avg	128.5	15.8333		0.0349177	0.218134
		sd	59.1228	8.61201		0.0297223	0.10463
		se	24.1368	3.51584		0.0121341	0.0523152

## Sheet: Stats BW
			Time to stabilize			Dmax
		Bird	T1	T2		T1	T2
		1	179	3		0.0113878
		2	125	1		0.0365506
		3	108	4		0.0075
		4	137	22		0.023
		5	101	14		0.014
		6	30	6		0.0488
		avg	113.333	8.33333		0.0235397	#DIV/0!
		sd	49.2612	8.06639		0.0161469	#DIV/0!
		se	20.1108	3.29309		0.00659192	#DIV/0!

[truncated: 2 more sheets: Stats MF, Stats Ent]
