# Supplementary material for: Accelerated redevelopment of vocal skills is preceded by lasting reorganization of the song motor circuitry
Source: eLife journal article supplement (doi:10.7554/elife.43194), 2019-05-17
Supplement: supp [file elife-43194-supp-v1.zip › elife_poa_e43194_Figure_4_source_data_1.xlsx]

## Sheet: CC T1xT1
CC T1xT1
	Bird	CC SR	CC Duration	CC Pause	CC FM	CC AM	CC BW	CC MF	CC Ent
	1	0.996475	0.992394	0.993756	0.957249	0.910531	0.991688	0.993136	0.990354
	2	0.987813	0.964424	0.851837	0.986047	0.948708	0.984944	0.988838	0.951563
	3	0.958236	0.916578	0.818279	0.953157	0.847064	0.961321	0.902791	0.907028
	4	0.965931	0.738527	0.748412	0.960591	0.980311	0.839868	0.913476	0.937149
	5	0.966458	0.929415	0.914025	0.965181	0.942762	0.958665	0.889868	0.950578
	6	0.888706	0.962684	0.964918	0.973203	0.94522	0.986129	0.930949	0.92732
	mean	0.960603	0.917337	0.881871	0.965905	0.929099	0.953769	0.93651	0.943999
	sd	0.0381174	0.0916807	0.0929582	0.0120431	0.0458873	0.0574655	0.0443141	0.0280759
	sem	0.0155614	0.0374285	0.03795	0.00491657	0.0187334	0.0234602	0.0180912	0.011462

## Sheet: CC T1xT2
CC T1xT2
	Bird	CC SR	CC Duration	CC Pause	CC FM	CC AM	CC BW	CC MF	CC Ent
	1	0.938792	0.950491	0.962136	0.884143	0.755055	0.971328	0.931205	0.840761
	2	0.966148	0.795885	0.86684	0.948821	0.959735	0.791744	0.942947	0.90458
	3	0.913553	0.777681	0.779572	0.878383	0.919213	0.670523	0.741148	0.947889
	4	0.930471	0.952901	0.983962	0.983765	0.888244	0.956211	0.603147	0.91738
	5	0.609597	0.653252	0.840112	0.937847	0.806091	0.897206	0.870324	0.880229
	6	0.872107	0.893789	0.844405	0.942499	0.963347	0.984323	0.857735	0.935648
	mean	0.871778	0.837333	0.879504	0.929243	0.881948	0.878556	0.824418	0.904414
	sd	0.132156	0.117056	0.07832	0.040562	0.0848069	0.124085	0.13005	0.0391671
	sem	0.0539523	0.0477878	0.031974	0.0165594	0.0346223	0.0506575	0.0530927	0.0159899

## Sheet: Euclidean distance
Euclidean distance
		Bird	T1 x T1	T1 x T2	T1 x T2(ext)
		1	0.848641	0.961638	2.91921
		2	0.85947	0.88381	2.67221
		3	0.631964	0.646053	1.53451
		4	0.674207	0.703744	1.66926
		5	0.717403	0.624679	1.92731
		6	0.661948	0.718354	2.02384
		Mean	0.732272	0.75638	2.12439
		sd	0.0983065	0.135723	0.554237
		se	0.0401335	0.0554086	0.226266

## Sheet: Phrase transitions
Bird	1														entropy		consistency	linearity
	T1		AB	AC	BC	BE	CB	CD	DB	DE	EB	ED			2.69652		0.964017	1.03695
		PD	0.00515464	0.108247	0.0773196	0.0257732	0.00515464	0.185567	0.108247	0.252577	0.0103093	0.221649
		log	-0.0391748	-0.347214	-0.285543	-0.136031	-0.0391748	-0.450926	-0.347214	-0.501417	-0.0680403	-0.481788
		TYP		*	*			*	*	*		*
Bird	1														entropy		consistency	linearity
	T2		AB	AC	BC	BE	CB	CD	DB	DE	EB	ED			2.65003		0.957579	1.09934
		PD	0.0254237	0.0974576	0.118644	0	0.00423729	0.211864	0.122881	0.224576	0	0.194915
		log	-0.134687	-0.327368	-0.364865	0	-0.033401	-0.474319	-0.371675	-0.4839	0	-0.459821
		TYP		*	*			*	*	*		*
Bird	2														entropy		consistency	linearity
	T1						AB	BC	CD	DE	EA	IA			2.54273		1	1.0641
						PD	0.19214	0.19214	0.18559	0.172489	0.172489	0.0851528
						log	-0.457249	-0.457249	-0.450948	-0.437333	-0.437333	-0.302616
						TYP	*	*	*	*	*	*
Bird	2														entropy		consistency	linearity
	T2						AB	BC	CD	DE	EA	IA			2.58496		1	1
						PD	0.166667	0.166667	0.166667	0.166667	0.166667	0.166667
						log	-0.430827	-0.430827	-0.430827	-0.430827	-0.430827	-0.430827
						TYP	*	*	*	*	*	*
Bird	3																														entropy		consistency	linearity
	T1		AB	BC	BD	BF	CD	CE	CF	CG	DE	DF	ED	EF	EI	EJ	FB	FD	FG	GD	GE	ID	IF	IJ	JD	JE	JF	JI			3.82583		0.835267	0.841387
		PD	0.0736342	0.0617577	0.00950119	0.00475059	0.0308789	0.0190024	0.00712589	0.00475059	0.0593824	0.0118765	0.0023753	0.0831354	0.123515	0	0.0023753	0.0356295	0.128266	0	0.130641	0	0.0736342	0.0736342	0	0.0023753	0.0261283	0.0356295
		log	-0.277121	-0.248095	-0.0638259	-0.0366635	-0.154927	-0.108649	-0.0508269	-0.0366635	-0.241913	-0.075959	-0.0207071	-0.298322	-0.372675	0	-0.0207071	-0.171406	-0.380025	0	-0.383604	0	-0.277121	-0.277121	0	-0.0207071	-0.137389	-0.171406
		TYP	*	*			*				*			*	*				*		*		*	*
Bird	3																														entropy		consistency	linearity
	T2		AB	BC	BD	BF	CD	CE	CF	CG	DE	DF	ED	EF	EI	EJ	FB	FD	FG	GD	GE	ID	IF	IJ	JD	JE	JF	JI			3.73971		0.822888	0.859436
		PD	0.0813953	0.0813953	0	0	0.0813953	0	0	0	0.0767442	0.0209302	0	0.109302	0.0744186	0.0372093	0	0	0.111628	0.00232558	0.109302	0.00697674	0.00930233	0.0930233	0.0186047	0.0488372	0	0.0372093
		log	-0.294562	-0.294562	0	0	-0.294562	0	0	0	-0.284245	-0.116754	0	-0.349068	-0.278935	-0.176677	0	0	-0.353105	-0.0203446	-0.349068	-0.049976	-0.0627739	-0.318722	-0.106943	-0.212729	0	-0.176677
		TYP	*	*			*				*			*	*				*		*		*	*
Bird	4																									entropy		consistency	linearity
	T1		AB	AF	BC	BD	BF	CB	CD	CE	CF	CG	DB	DE	DG	EA	EB	EF	FB	FD	FE	GB	GF			3.69417		0.884638	0.683701
		PD	0.0746269	0.021322	0.198294	0.0021322	0.021322	0	0.0895522	0.0234542	0.010661	0.0618337	0.00426439	0.0362473	0.102345	0.0511727	0	0.00852878	0.0767591	0.0575693	0.0021322	0.0724947	0.0852878
		log	-0.279415	-0.118369	-0.462875	-0.0189199	-0.118369	0	-0.311743	-0.126981	-0.0698456	-0.248291	-0.0335755	-0.173479	-0.336561	-0.219453	0	-0.0586221	-0.284279	-0.237102	-0.0189199	-0.274463	-0.302901
		TYP	*		*				*	*		*			*	*			*	*		*	*
Bird	4																									entropy		consistency	linearity
	T2		AB	AF	BC	BD	BF	CB	CD	CE	CF	CG	DB	DE	DG	EA	EB	EF	FB	FD	FE	GB	GF			3.63717		0.892928	0.699691
Bird	1	PD	0.0950226	0.0294118	0.199095	0	0.00678733	0.0113122	0.0158371	0.10181	0.00226244	0.0565611	0.00904977	0.020362	0.0837104	0.0769231	0.0180995	0.0158371	0.00678733	0.115385	0	0.0678733	0.0678733
		log	-0.322657	-0.149631	-0.463587	0	-0.0488887	-0.0731445	-0.0947146	-0.335571	-0.0198821	-0.234392	-0.061429	-0.114393	-0.299553	-0.284649	-0.104758	-0.0947146	-0.0488887	-0.359478	0	-0.263417	-0.263417
		TYP	*		*				*	*		*			*	*			*	*		*	*
Bird	5												consistency	linearity
	T1		AB	BC	CB	CD	DB	DC			Entropy		1	0.902564
		PD	0.110169	0.389831	0.242938	0.135593	0.121469	0
		log	1	3.53846	2.20513	1.23077	1.10256	0			1.95012
		TYP	*	*	*	*	*
Bird	5												consistency	linearity
	T2	PD	AB	BC	CB	CD	DB	DC			Entropy		0.997826	0.871014
		log	0.104784	0.398633	0.207289	0.159453	0.127563	0.0022779
		TYP	0.938776	3.57143	1.85714	1.42857	1.14286	0.0204082			1.81797
			*	*	*	*	*
Bird	6												consistency	linearity
	T1		AB	AC	BC	CB	CD	DB			entropy		0.959683	0.981818
		PD	0.0210526	0.00210526	0.326316	0.00210526	0.324211	0.324211
		log	-0.11726	-0.0187195	-0.527215	-0.0187195	-0.526841	-0.526841			1.7356
		TYP			*		*	*
Bird	6												consistency	linearity
	T2		AB	AC	BC	CB	CD	DB			entropy		0.968657	1
		PD	0.020339	0	0.327119	0	0.327119	0.325424
		log	-0.114297	0	-0.527353	0	-0.527353	-0.527059			1.69606
		TYP			*		*	*
		T1	T1	T1	T2	T2	T2
	Bird	consistency	linearity	entropy	consistency	linearity	entropy
	1	0.964017	1.03695	2.69652	0.957579	1.09934	2.65003
	2	1	1.0641	2.54273	1	1	2.58496
	3	0.835267	0.841387	3.82583	0.822888	0.859436	3.73971
	4	0.884638	0.683701	3.69417	0.892928	0.699691	3.63717
	5	1	0.902564	1.95012	0.997826	0.871014	1.81797
	6	0.959683	0.981818	1.7356	0.968657	1	1.69606
	AVG	0.940601	0.918421	2.74083	0.93998	0.921581	2.68765
	SD	0.0666273	0.141825	0.867525	0.0692895	0.141104	0.867175
	SE	0.0272005	0.0578998	0.354166	0.0282873	0.0576057	0.354023
