# Supplementary material for: Accelerated redevelopment of vocal skills is preceded by lasting reorganization of the song motor circuitry
Source: eLife journal article supplement (doi:10.7554/elife.43194), 2019-05-17
Supplement: supp [file elife-43194-supp-v1.zip › elife_poa_e43194_Figure_5_source_data_1.xlsx]

## Sheet: spine density HVC
HVC	Spine density (#/um)
	Bird	treatment
		Control	T1+	T1-
	1	0.785045	0.807357	0.598452
	2	0.992611	0.564909	0.484613
	3	0.961413	0.720106	0.624531
	4	0.845074	0.687102	0.787695
	5	1.2971	0.457791	0.757985
	6	0.843394	0.693166	0.861081
	7		0.575812
	8		0.640704
	avg	0.954106	0.643368	0.685726
	sd	0.185421	0.108456	0.140126
	se	0.075698	0.0383451	0.0572063

## Sheet: spine density RA
RA	Spine density (#/um)
	Bird	treatment
		C	T1+	T1-
	1	0.687297	0.608905	0.694245
	2	0.728173	0.429887	0.509965
	3	0.75853	0.656982	0.685665
	4	0.569577	0.637159	0.50654
	5	0.60831	0.65731	0.6541
	6	0.50493	0.682709	0.751819
	avg	0.642803	0.612159	0.633722
	sd	0.0982052	0.0926108	0.10219
	se	0.0400921	0.0378082	0.041719

## Sheet: dendrite probability 
	Dendrite probability
			BINS	0 - 0.2	0.2 - 0.4	0.4 - 0.6	0.6 - 0.8	0.8 - 1.0	1.0 - 1.2	1.2 - 1.4	1.4 - 1.6	1.6 - 1.8
	Group
	Control	Bird 1		0	0.0891089	0.168317	0.30297	0.160396	0.239604	0.039604	0	0
	Control	Bird 2		0	0.0529412	0.0882353	0.164706	0.288235	0.0588235	0.147059	0.141176	0.0588235
	Control	Bird 3		0	0.0835443	0.139241	0.144304	0	0.293671	0.339241	0	0
	Control	Bird 4		0	0	0.113957	0.299281	0.345612	0.2	0.0411511	0	0
	Control	Bird 5		0	0	0.0401567	0.0714985	0.191185	0.159843	0.0401567	0	0.2
	Control	Bird 6		0	0	0.154004	0.271869	0.291992	0.282136	0	0	0
			avg	0	0.0375991	0.117318	0.209105	0.212903	0.20568	0.101202	0.0235294	0.0431373
			se	0	0.0175506	0.0193549	0.0391525	0.0510222	0.0357951	0.051683	0.0235294	0.0328102
	T1+	Bird 1		0	0.112977	0.117557	0.287023	0.143511	0.225954	0	0.112977	0
	T1+	Bird 2		0.0607143	0.1875	0.430357	0.169643	0.0910714	0.0607143	0	0	0
	T1+	Bird 3		0	0.183607	0.167213	0.24918	0.216393	0.0655738	0.118033	0	0
	T1+	Bird 4		0	0.0670194	0.379894	0.2	0.17425	0.178836	0	0	0
	T1+	Bird 5		0	0.318563	0.507784	0.107784	0.0658683	0	0	0	0
	T1+	Bird 6		0	0.271854	0.156522	0.422883	0.020595	0	0	0.128146	0
	T1+	Bird 7		0	0.290909	0.272727	0.218182	0.145455	0.0727273	0	0	0
	T1+	Bird 8		0	0.249718	0.249718	0.0632768	0.350282	0.0870056	0	0	0
			avg	0.00758929	0.210268	0.285222	0.214747	0.150928	0.0863514	0.0147541	0.0301404	0
			se	0.00758929	0.0312806	0.0499248	0.0392742	0.0359716	0.0281039	0.0147541	0.0197835	0
	T1-	Bird 1		0	0.364984	0.0596866	0.315643	0.2	0.0596866	0	0	0
	T1-	Bird 2		0.0782123	0.267039	0.293855	0.173184	0.187709	0	0	0	0
	T1-	Bird 3		0	0.0277157	0.427716	0.344569	0.2	0	0	0	0
	T1-	Bird 4		0	0.135294	0.194118	0.135294	0.2	0.270588	0.0647059	0	0
	T1-	Bird 5		0	0.052381	0.2	0.442857	0.2	0	0.104762	0	0
	T1-	Bird 6		0	0.0981132	0.298113	0.101887	0.0679245	0.301887	0.132075	0	0
			avg	0.0130354	0.157588	0.245581	0.252239	0.175939	0.10536	0.0502572	0	0
			se	0.0130354	0.0538399	0.0508415	0.0552001	0.0216959	0.0581124	0.0241185	0	0
