# Supplementary figures and images for: Accelerated redevelopment of vocal skills is preceded by lasting reorganization of the song motor circuitry
Source: eLife journal article supplement (doi:10.7554/elife.43194), 2019-05-17

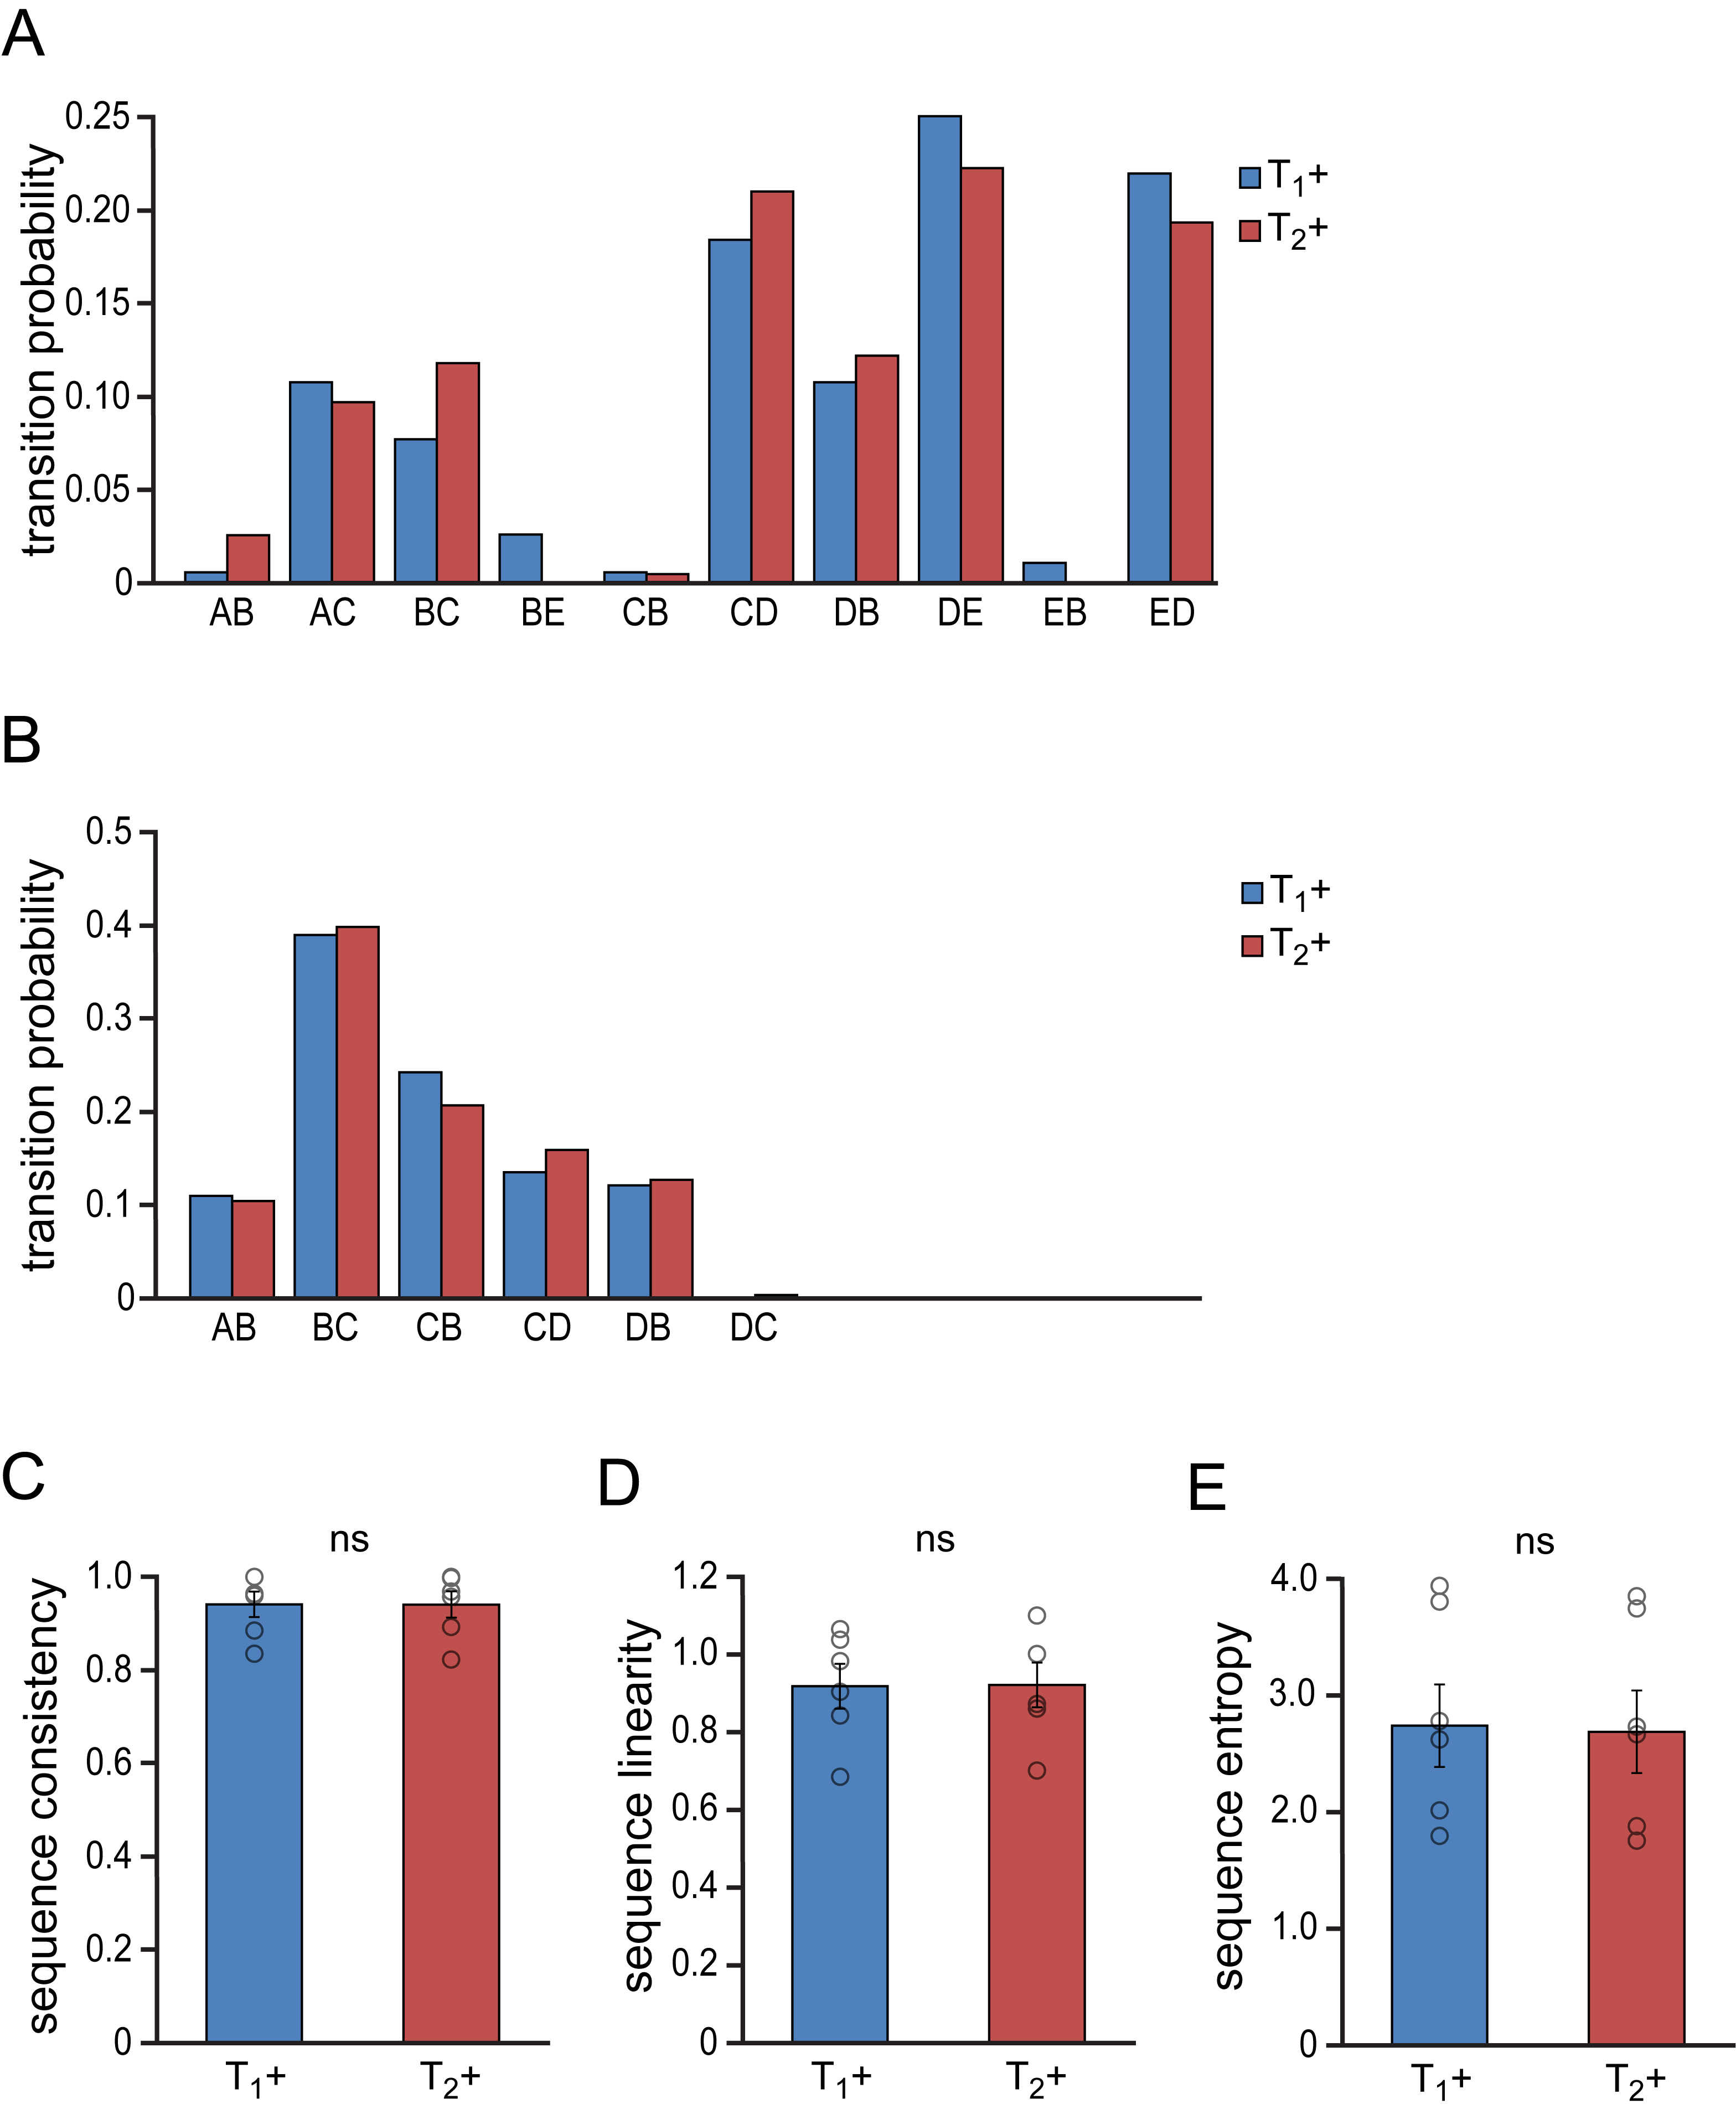

Supplement: supp [file elife-43194-supp-v1.zip › elife_poa_e43194_Figure_4_figure_supplement_2.tif]

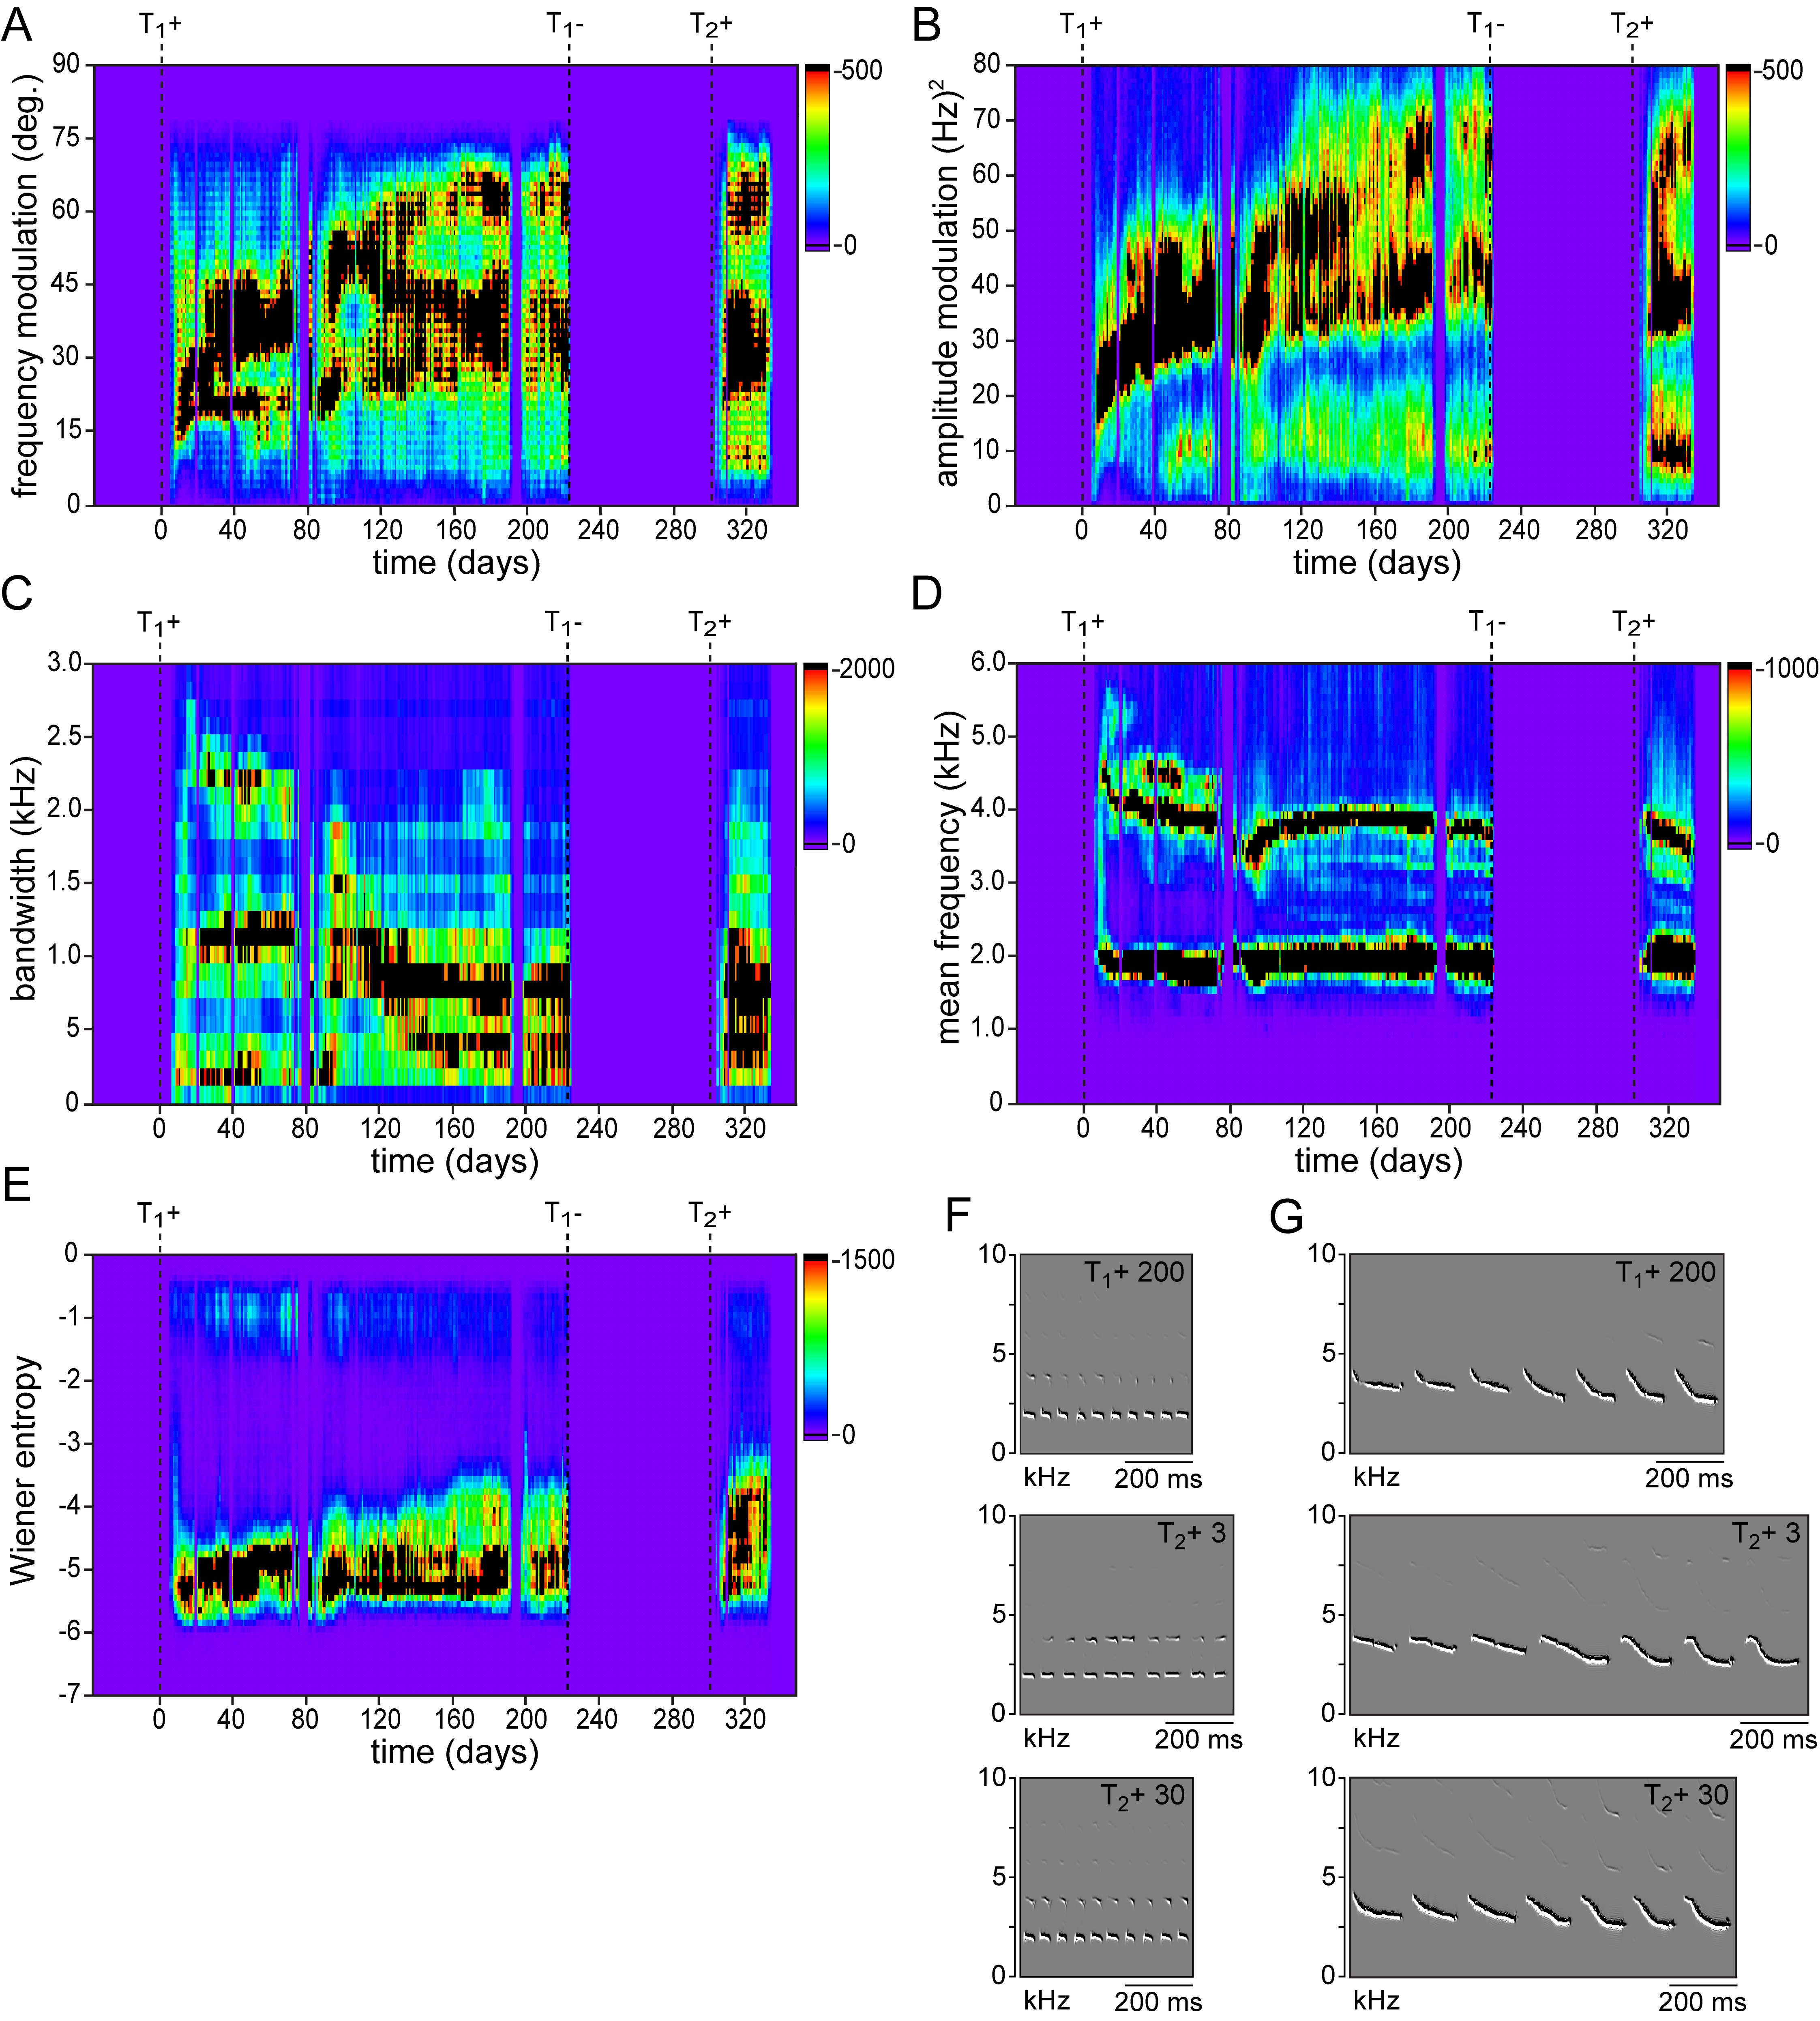

Supplement: supp [file elife-43194-supp-v1.zip › elife_poa_e43194_Figure_3_figure_supplement_2.tif]

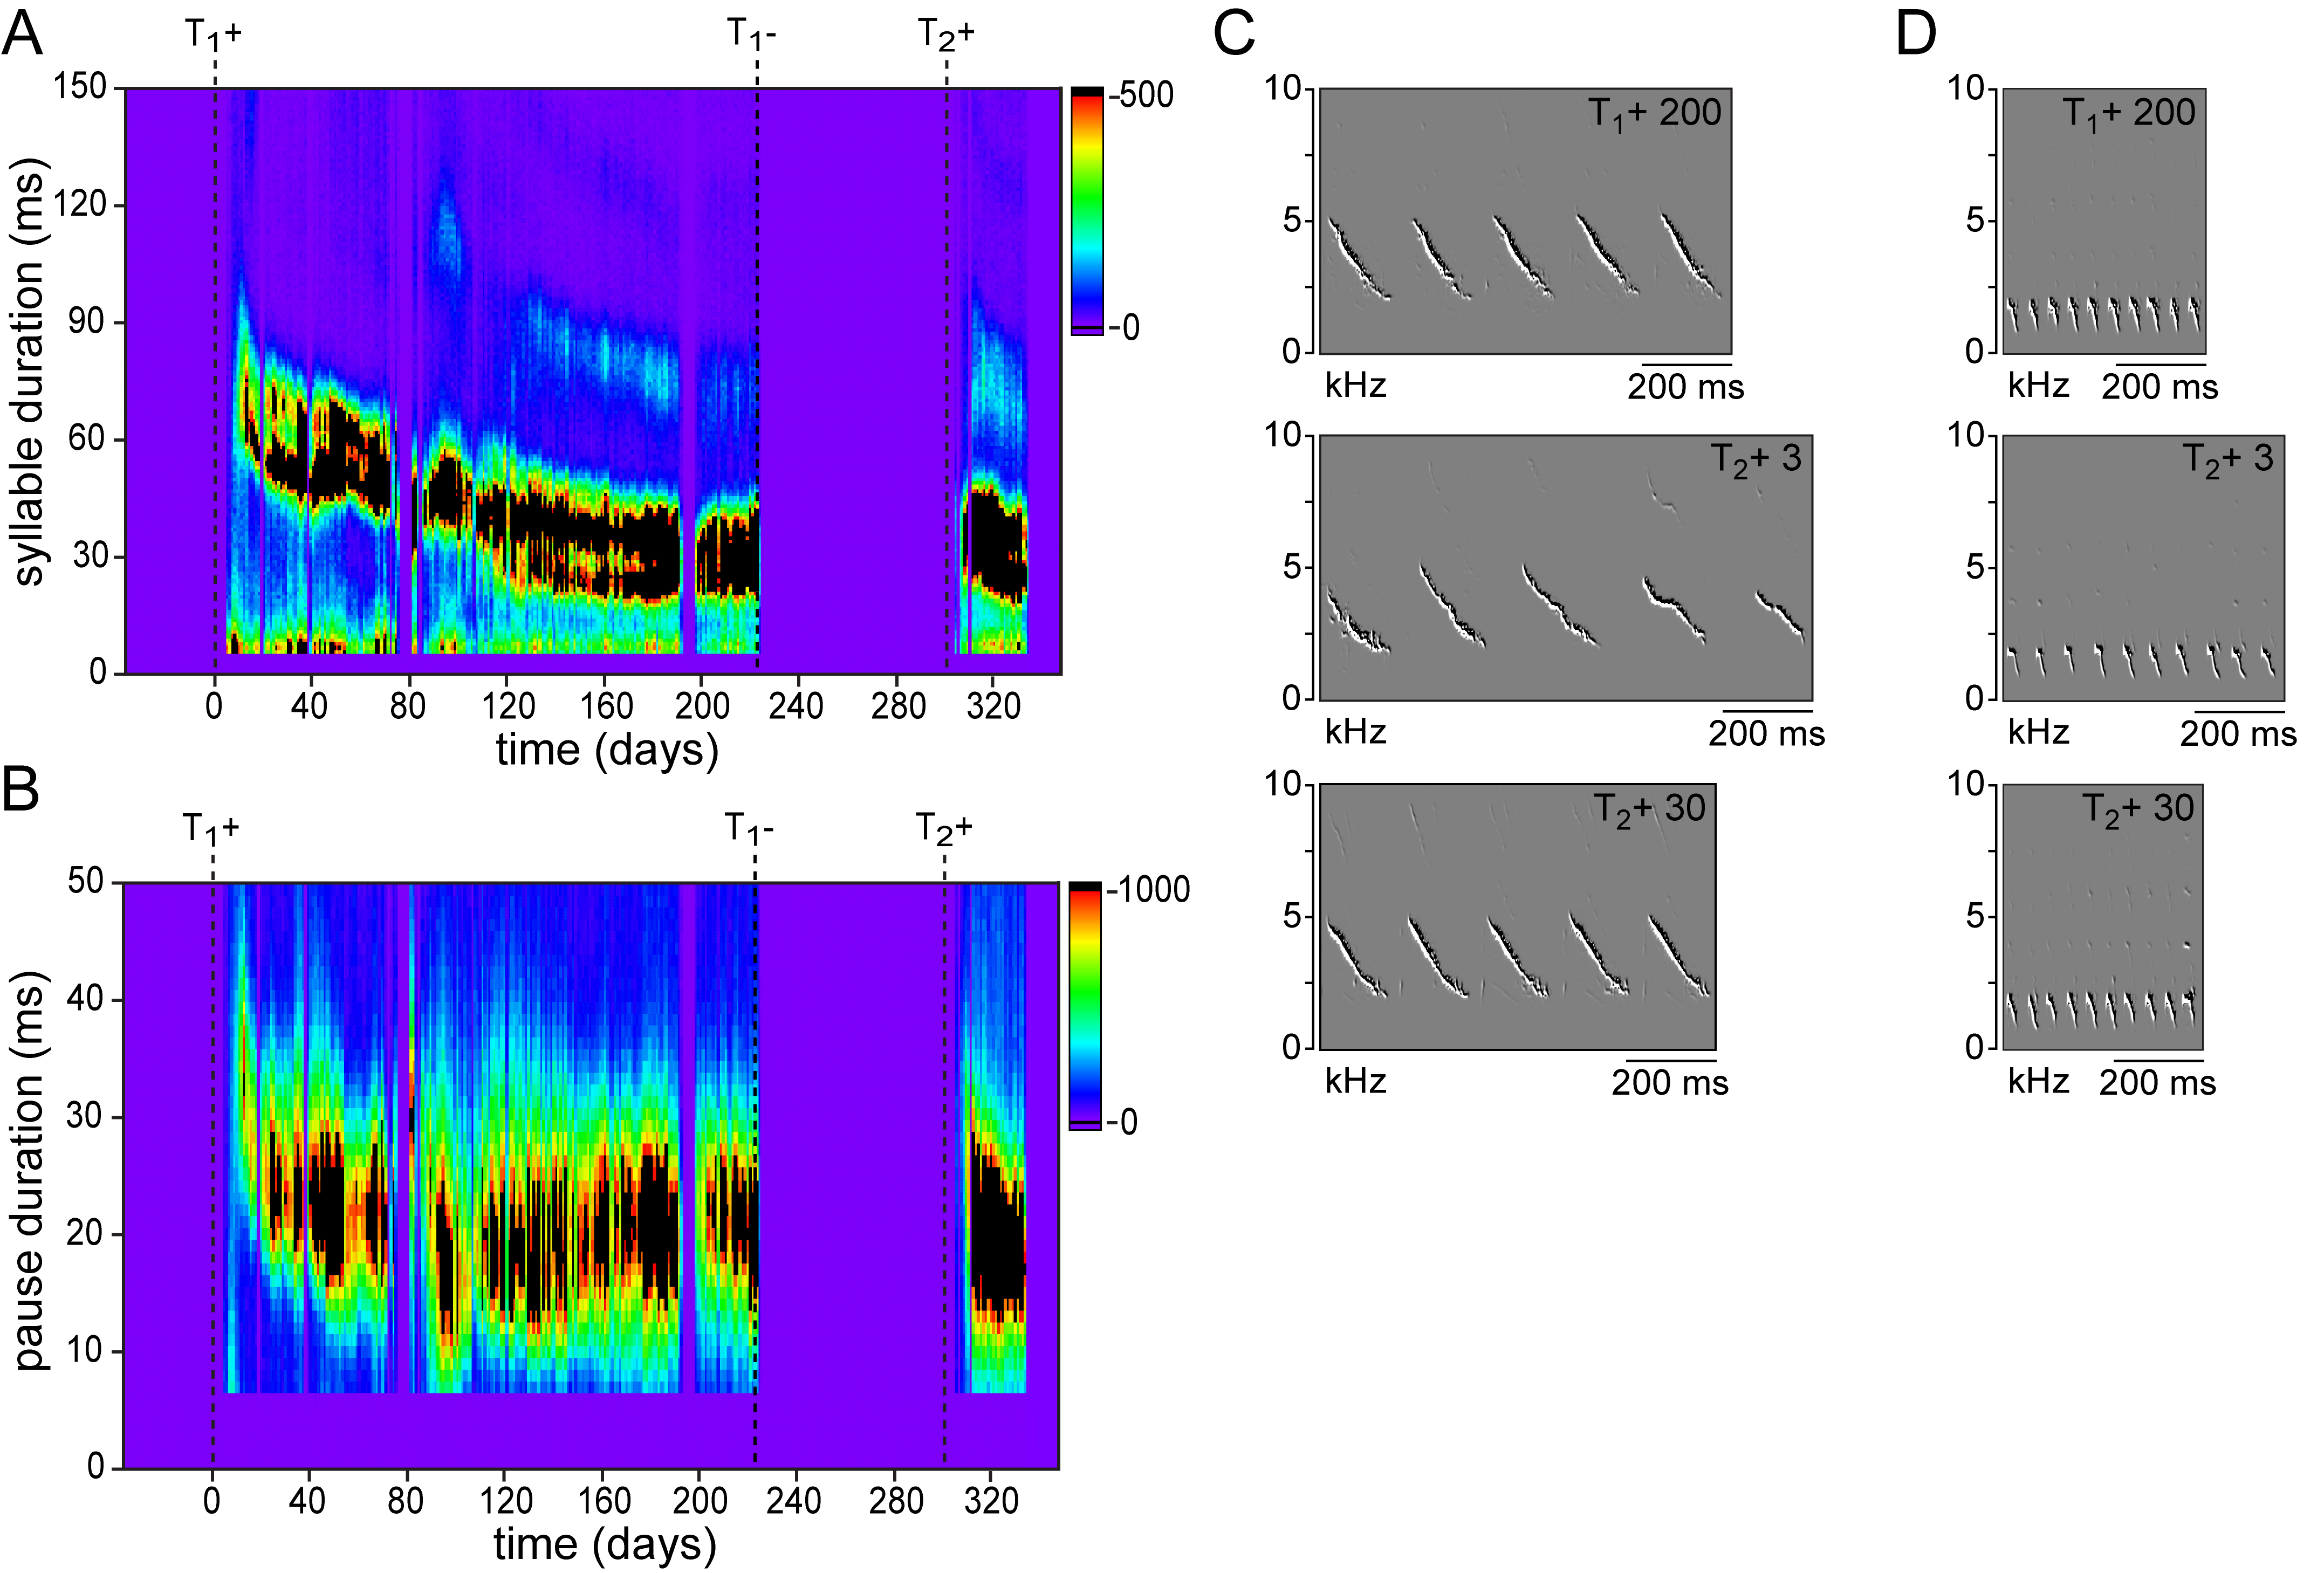

Supplement: supp [file elife-43194-supp-v1.zip › elife_poa_e43194_Figure_2_figure_supplement_2.tif]

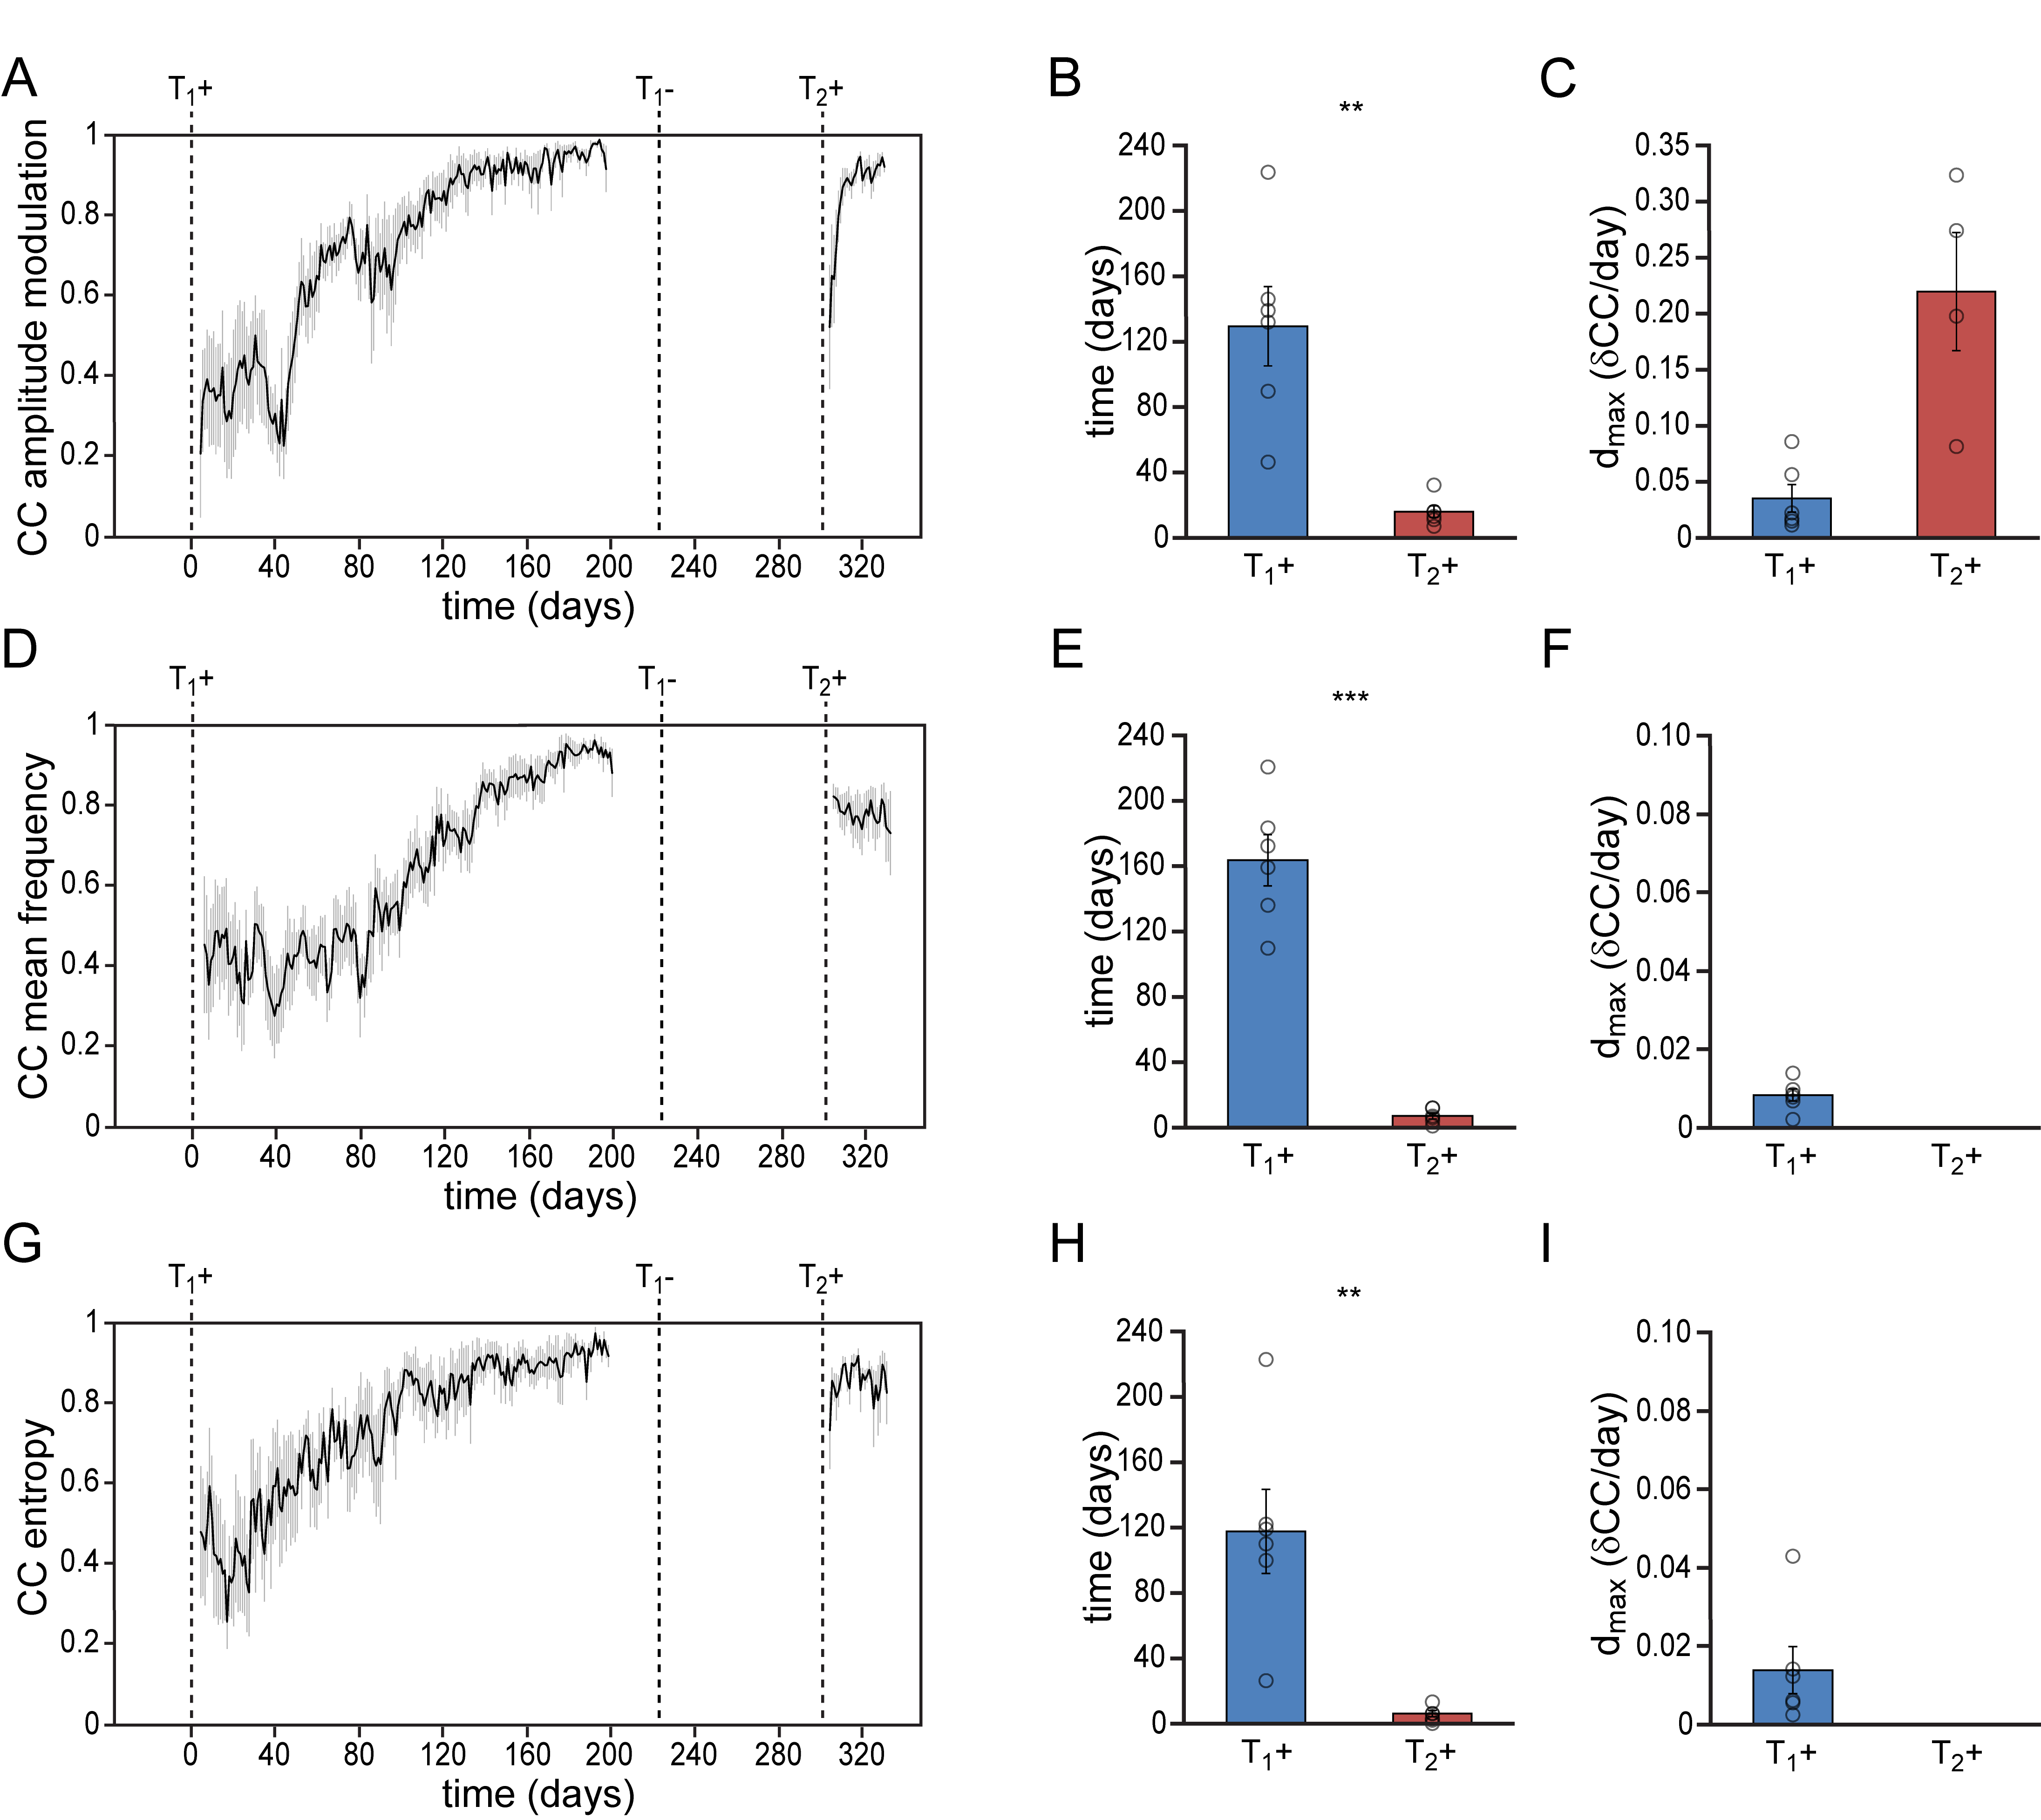

Supplement: supp [file elife-43194-supp-v1.zip › elife_poa_e43194_Figure_3_figure_supplement_1.tif]

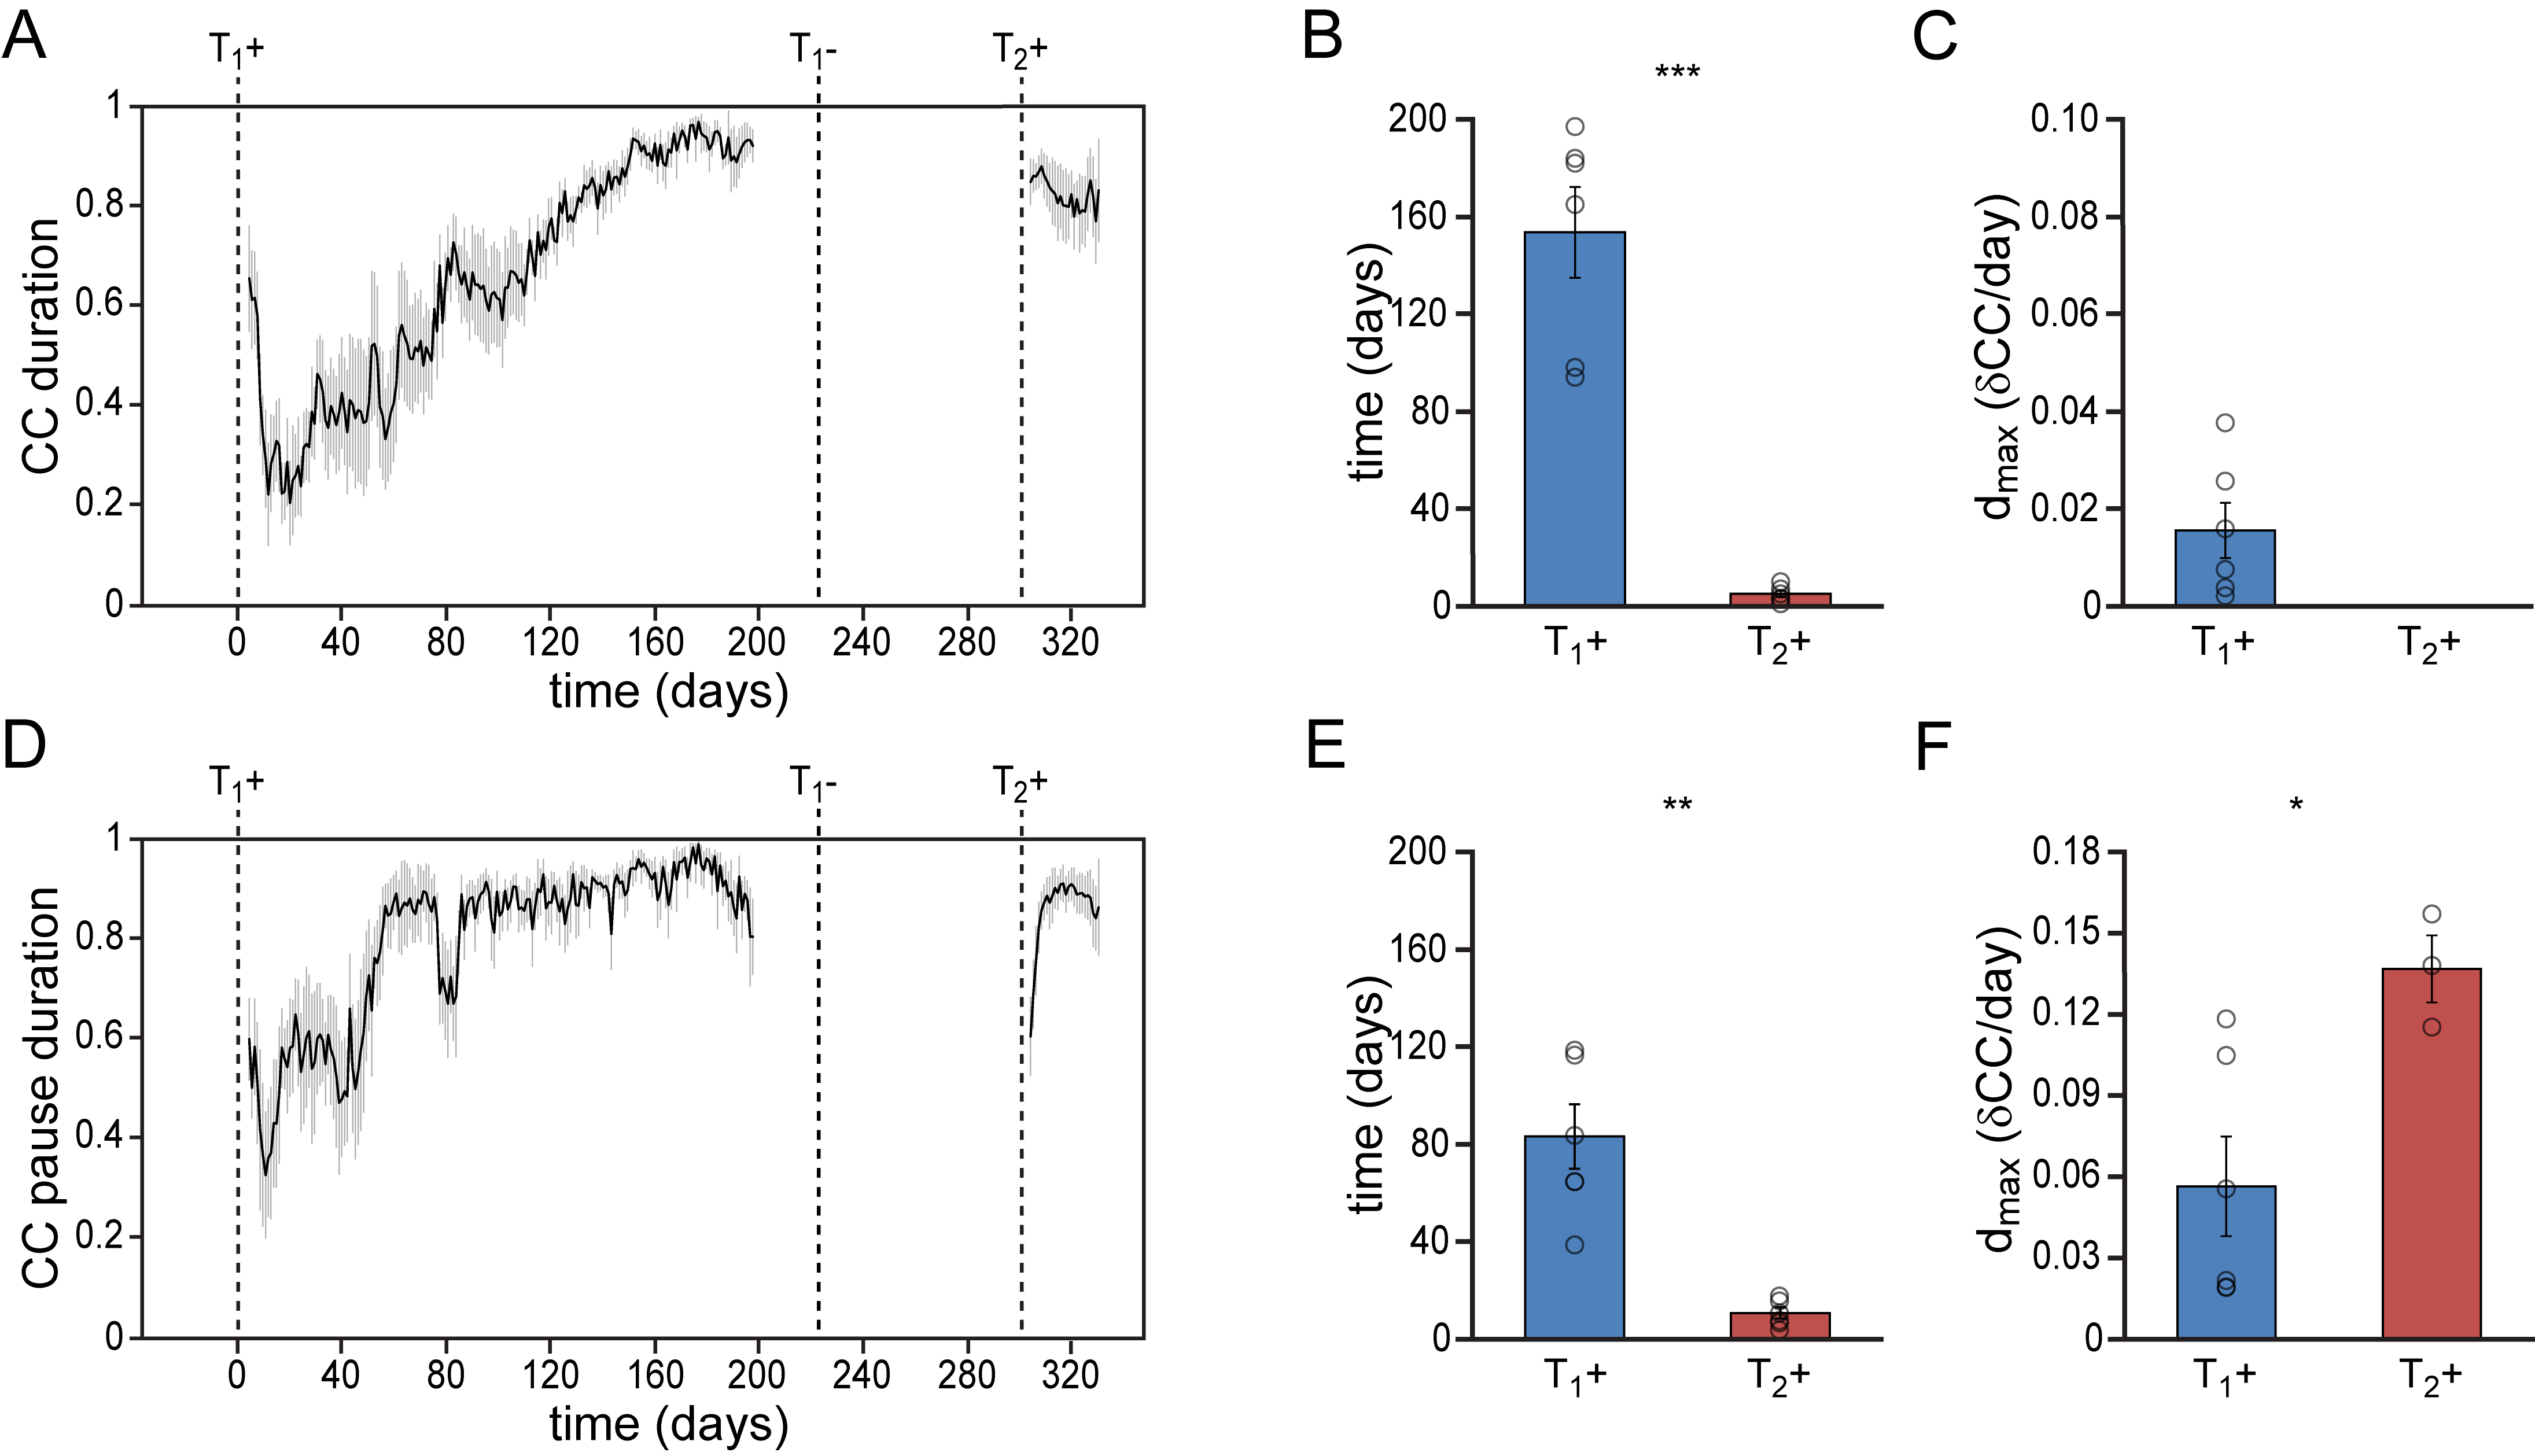

Supplement: supp [file elife-43194-supp-v1.zip › elife_poa_e43194_Figure_2_figure_supplement_1.tif]

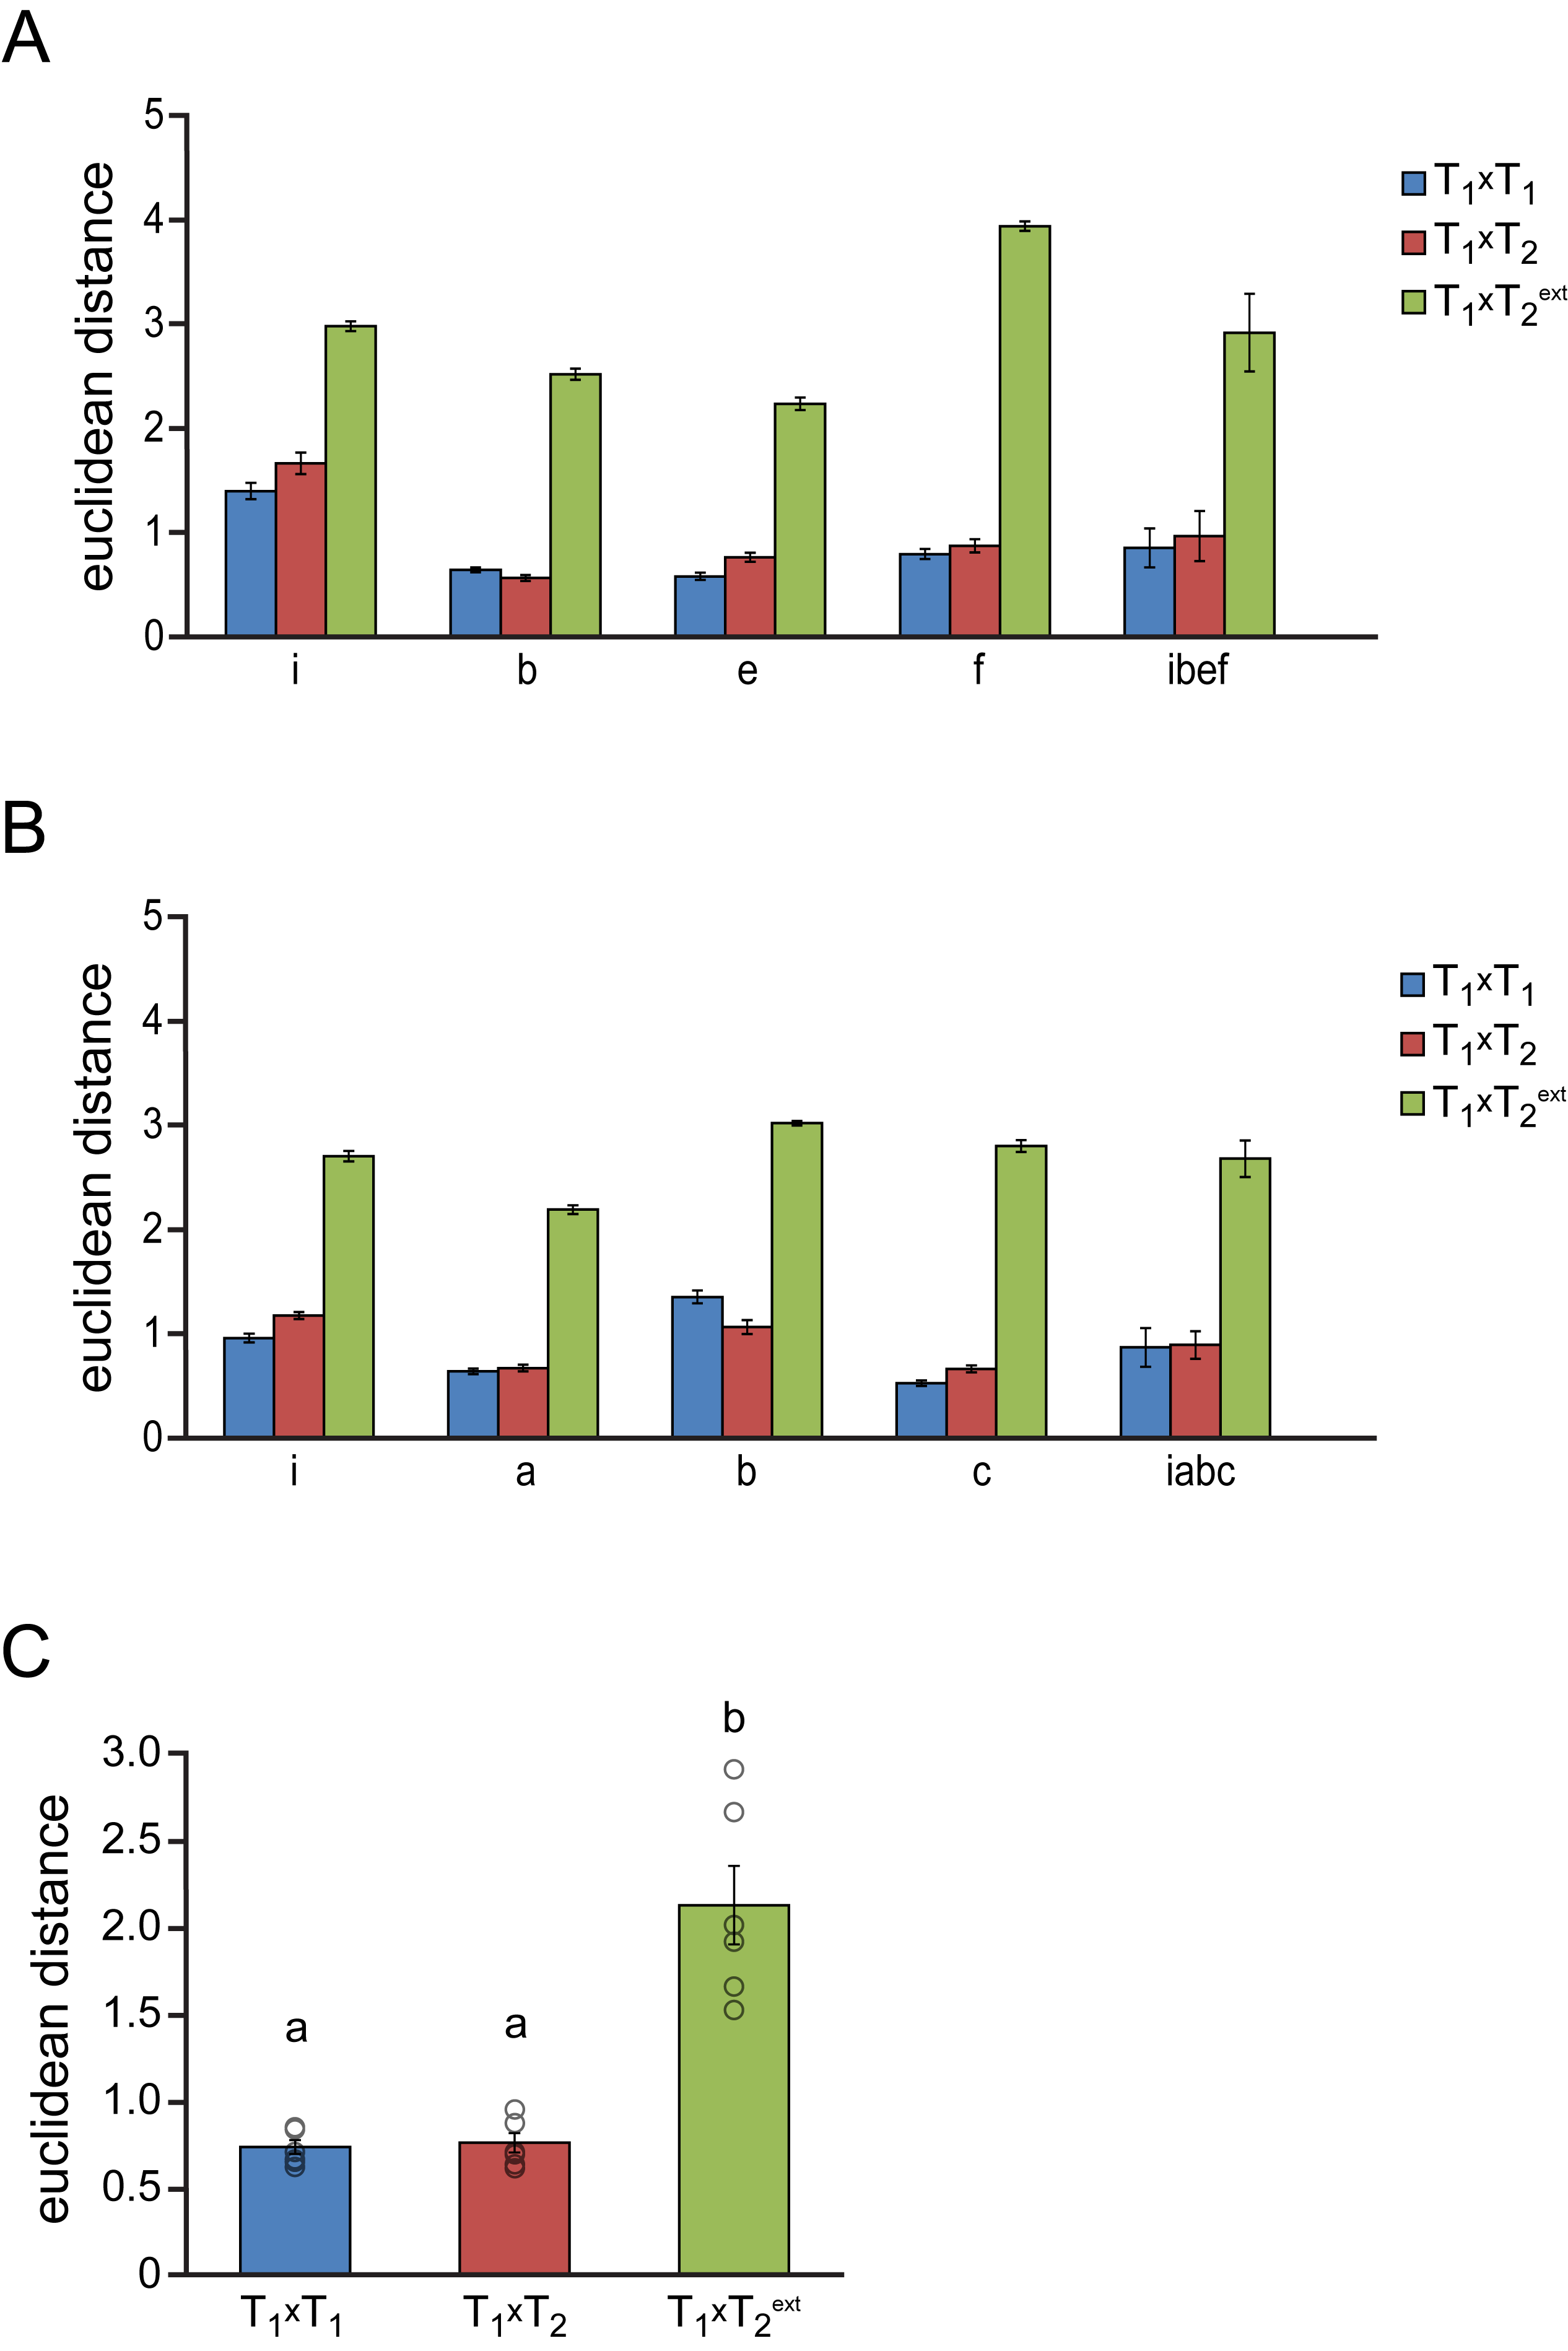

Supplement: supp [file elife-43194-supp-v1.zip › elife_poa_e43194_Figure_4_figure_supplement_1.tif]
